# Supplementary material
Source: PubMed Central journal article supplement (PMC4114395)

# **Synthetic studies on (-)-lemonomycin: construction of the tetracyclic core**

Alberto Jiménez-Somarribas and Robert M. Williams  
*Department of Chemistry, Colorado State University, Fort Collins, Colorado 80523-1872*

***Supplemental Information***

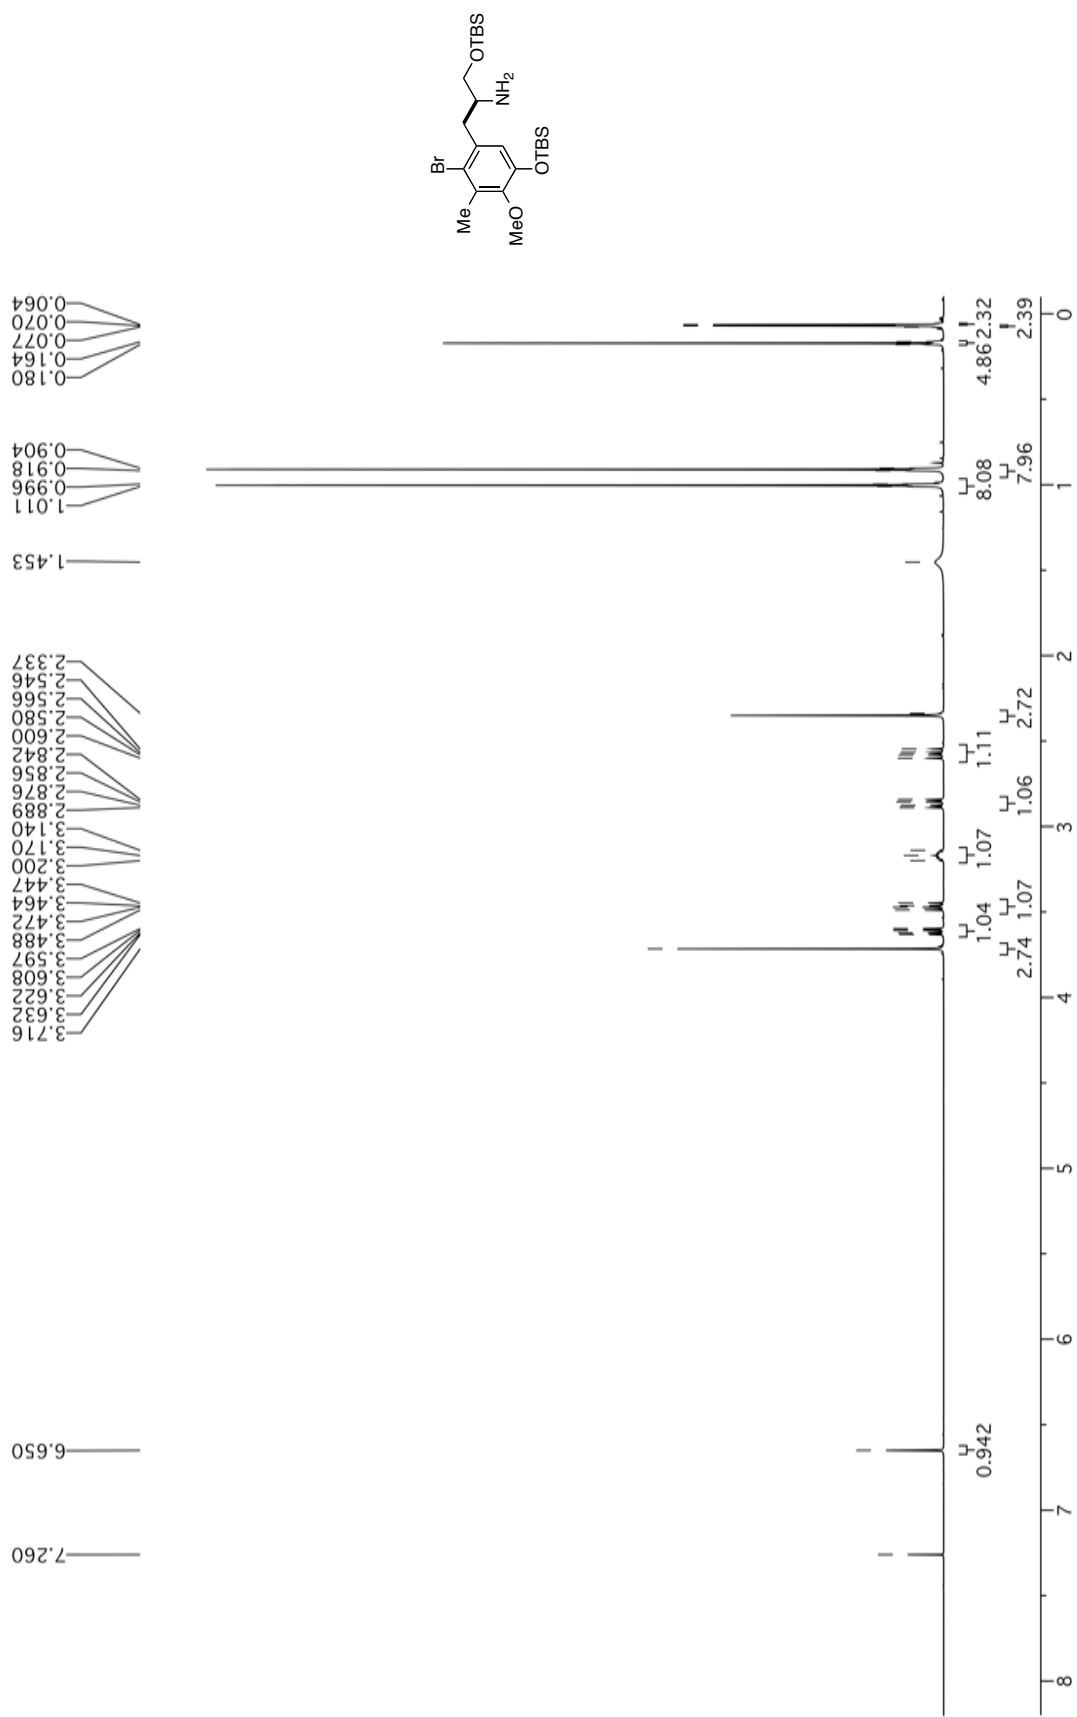

<sup>1</sup>H-NMR spectrum of compound 8 (400 MHz, CDCl<sub>3</sub>)

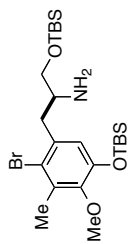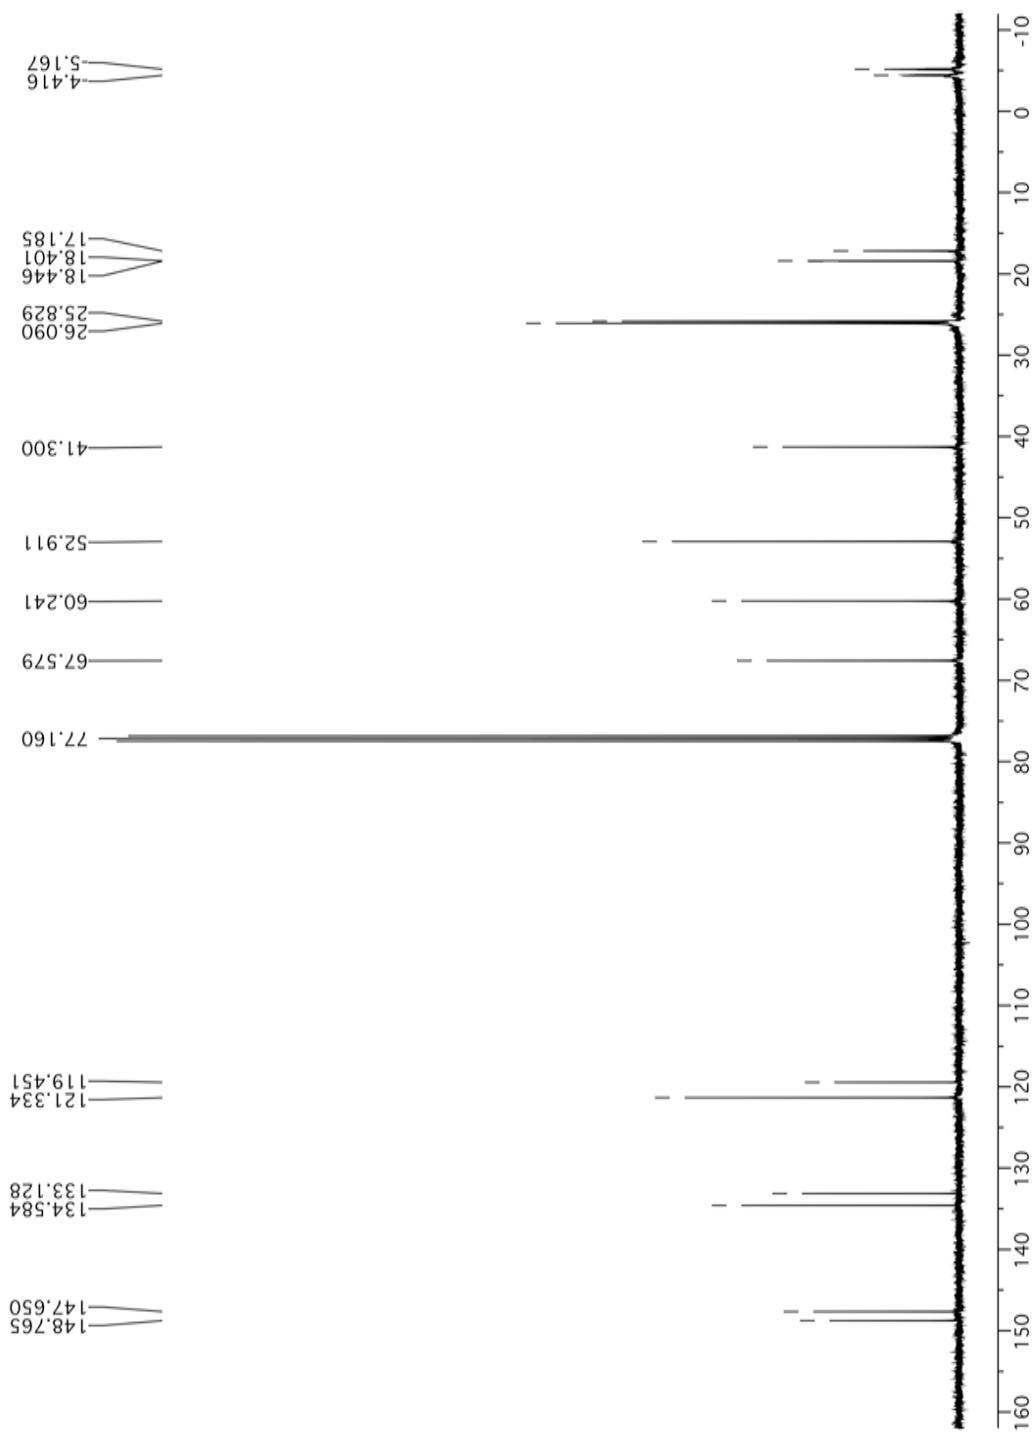

<sup>13</sup>C-NMR spectrum of compound 8 (101 MHz, CDCl<sub>3</sub>)

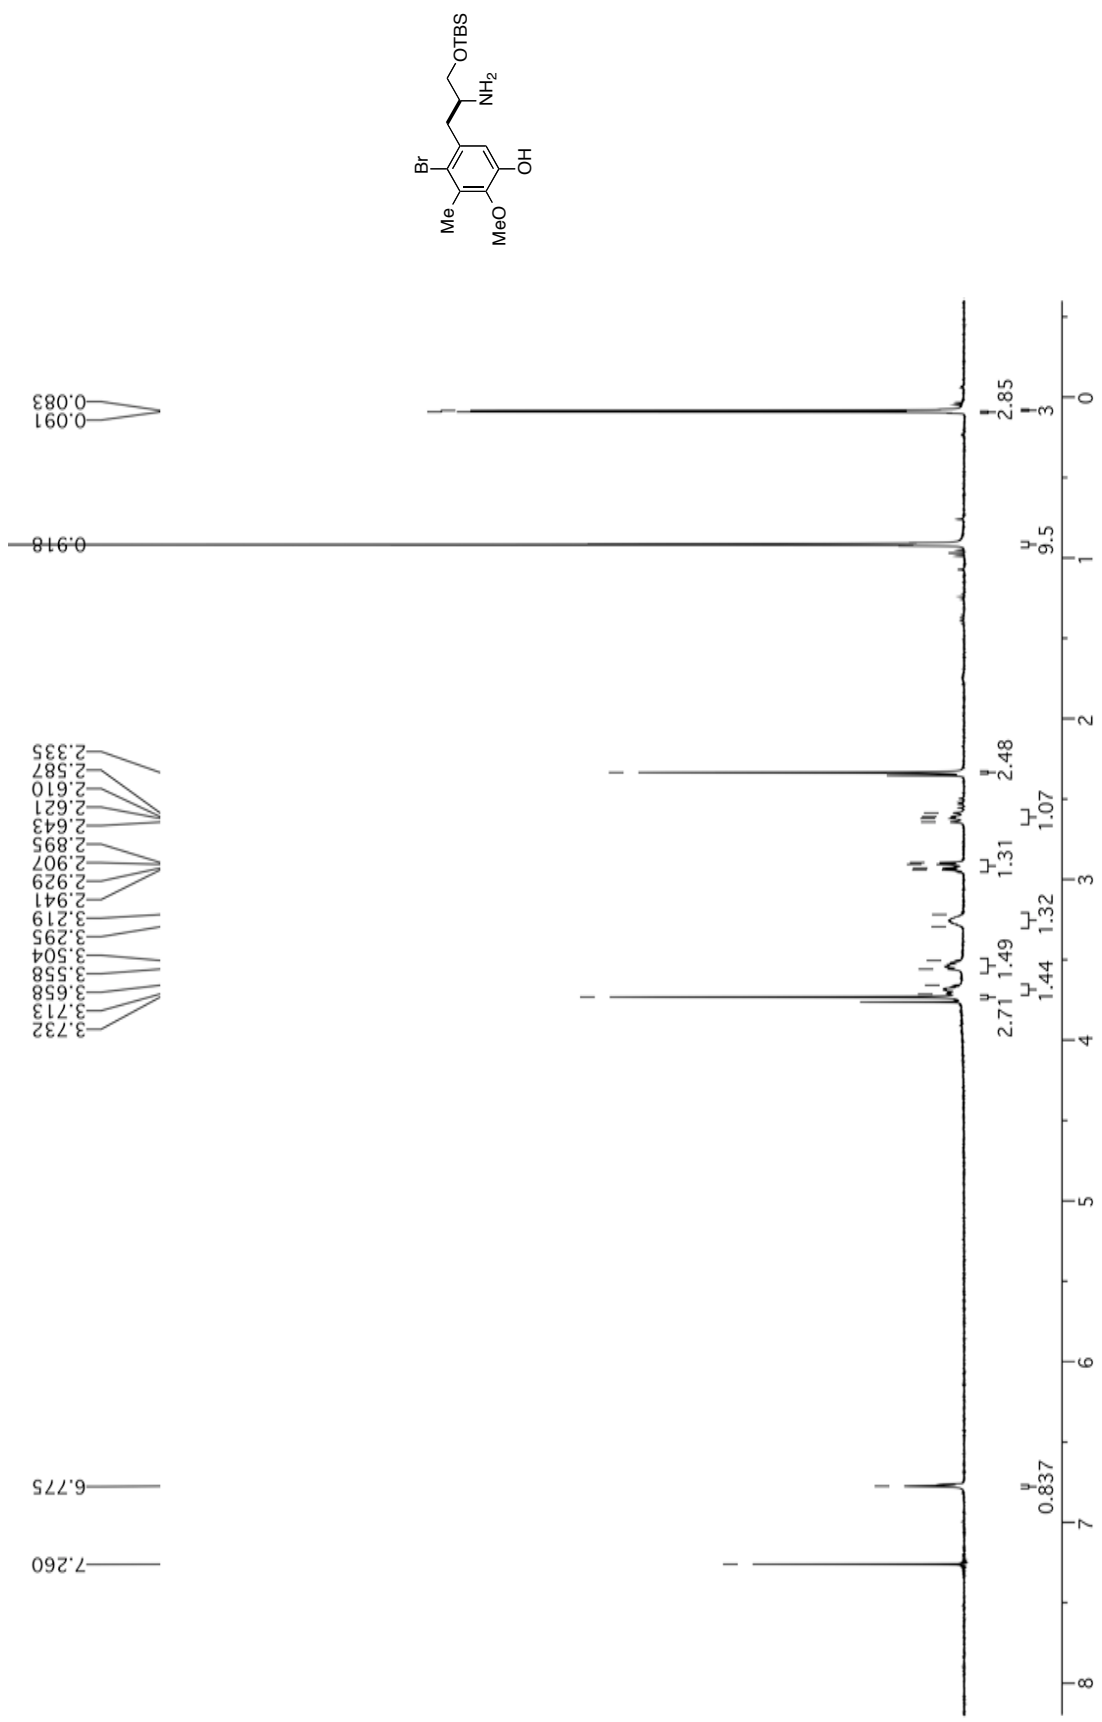

<sup>1</sup>H-NMR spectrum of compound 9 (400 MHz, CDCl<sub>3</sub>)

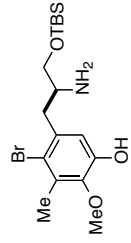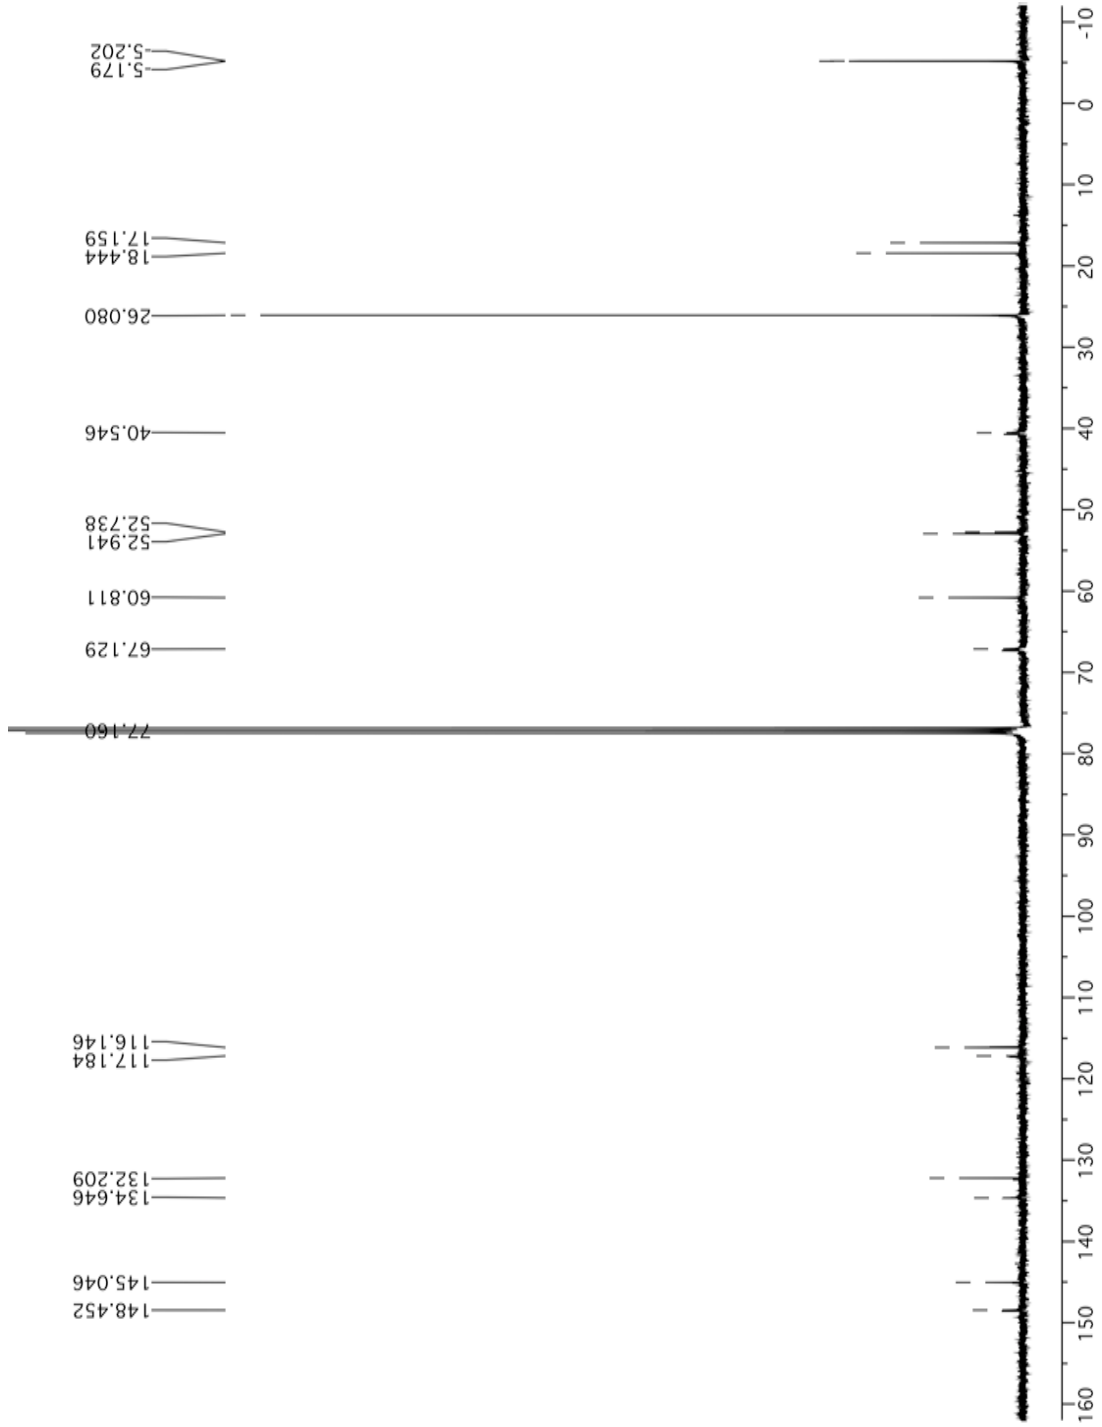

<sup>13</sup>C-NMR spectrum of compound 9 (101 MHz, CDCl<sub>3</sub>)

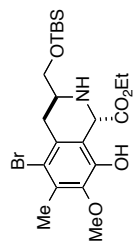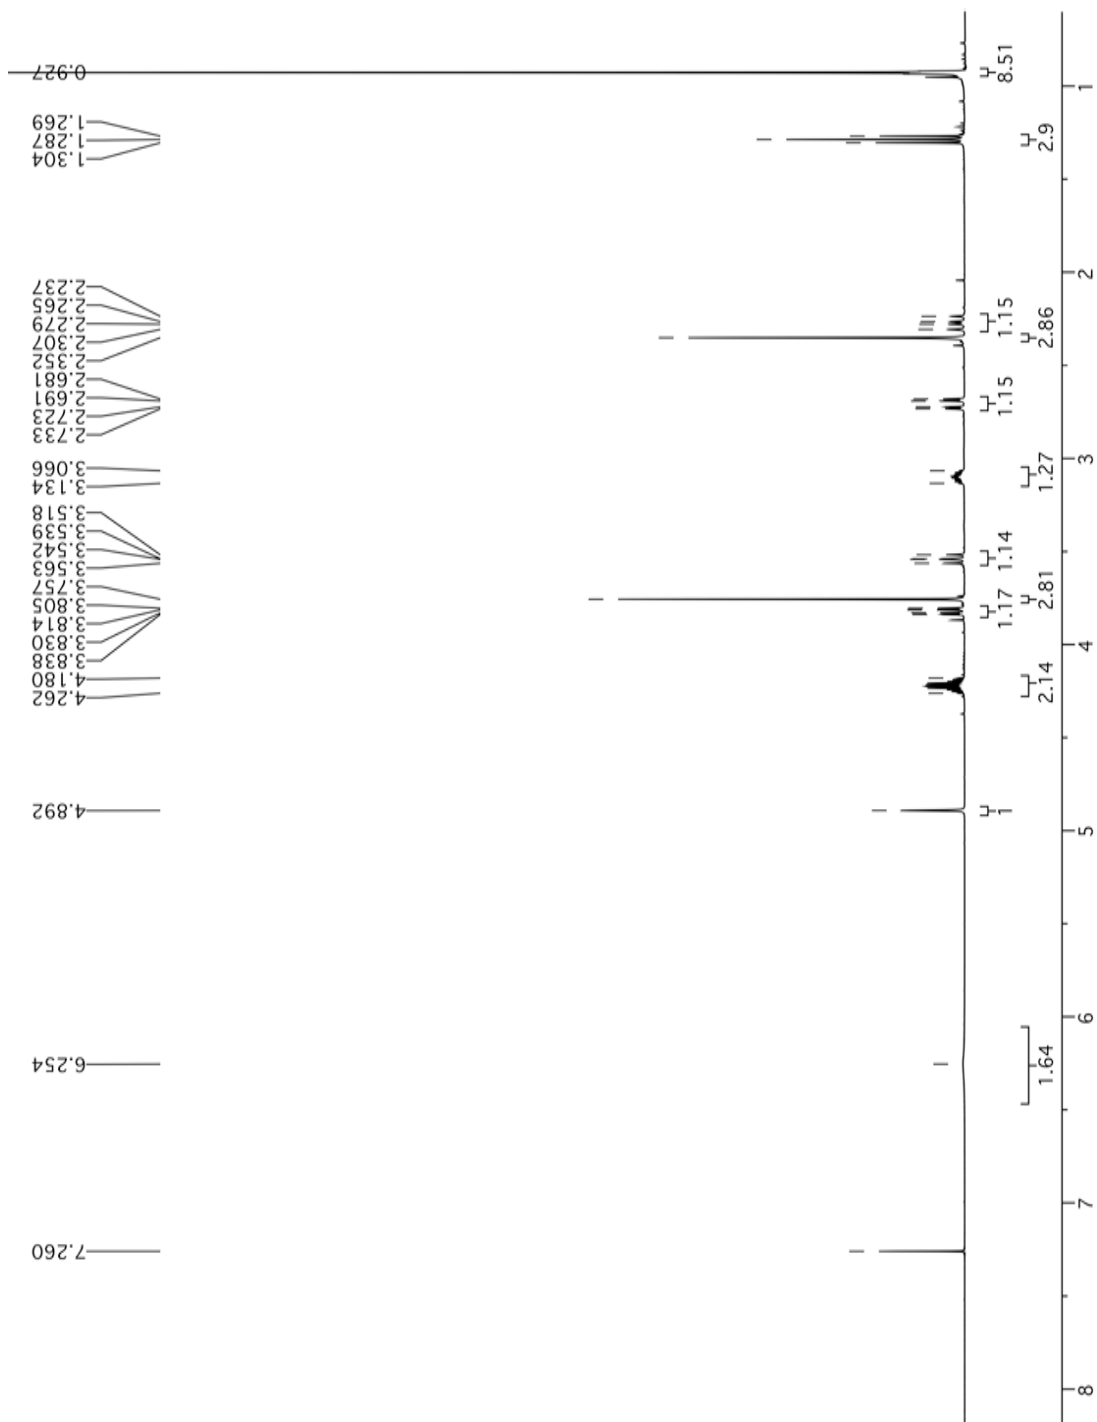

**<sup>1</sup>H-NMR spectrum of compound 10a (400 MHz, CDCl<sub>3</sub>)**

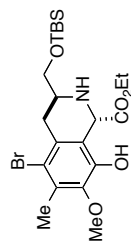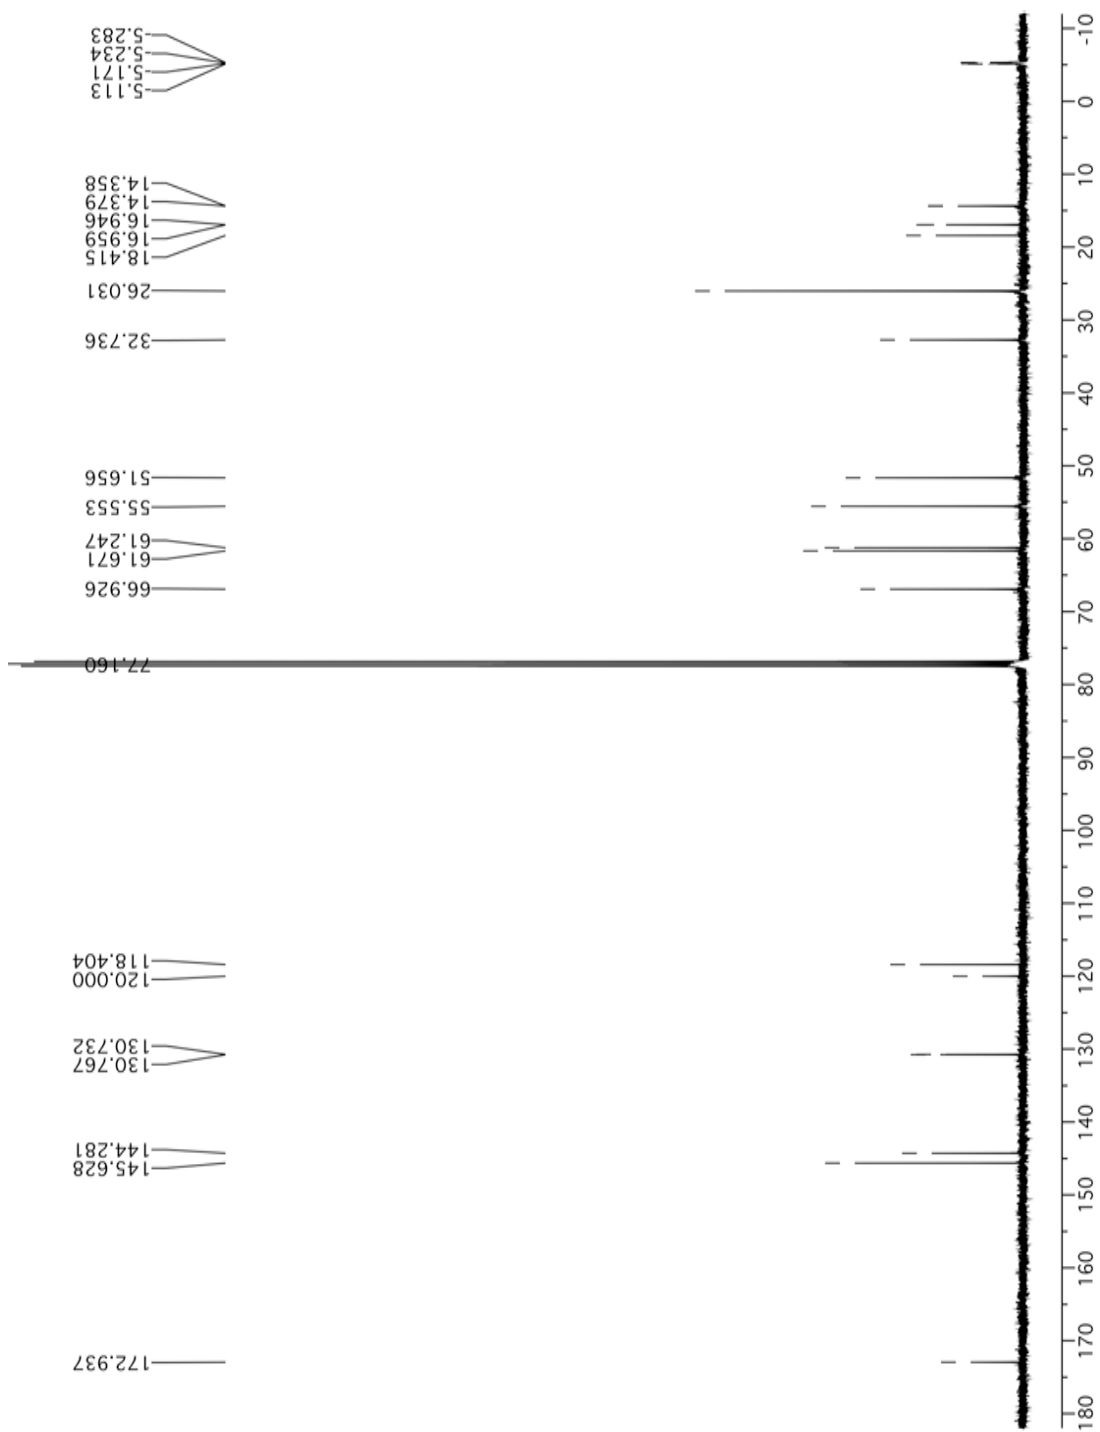

<sup>13</sup>C-NMR spectrum of compound 10a (101 MHz, CDCl<sub>3</sub>)

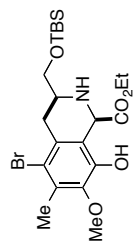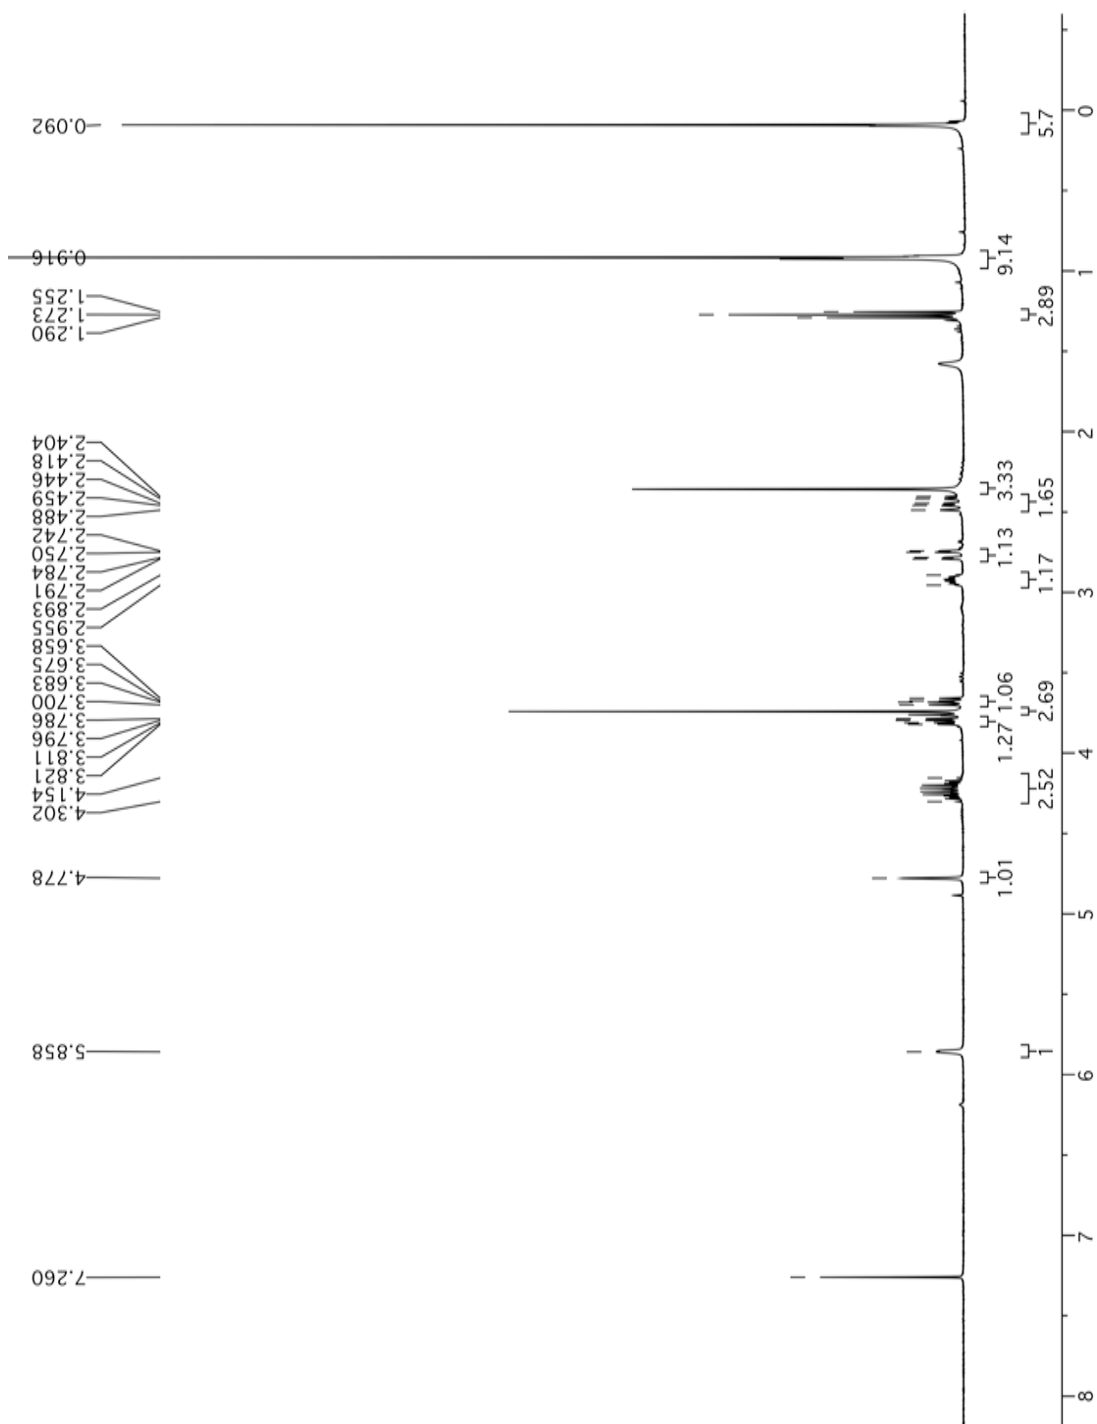

**<sup>1</sup>H-NMR spectrum of compound 10b (400 MHz, CDCl<sub>3</sub>)**



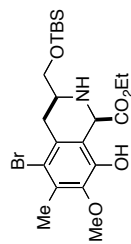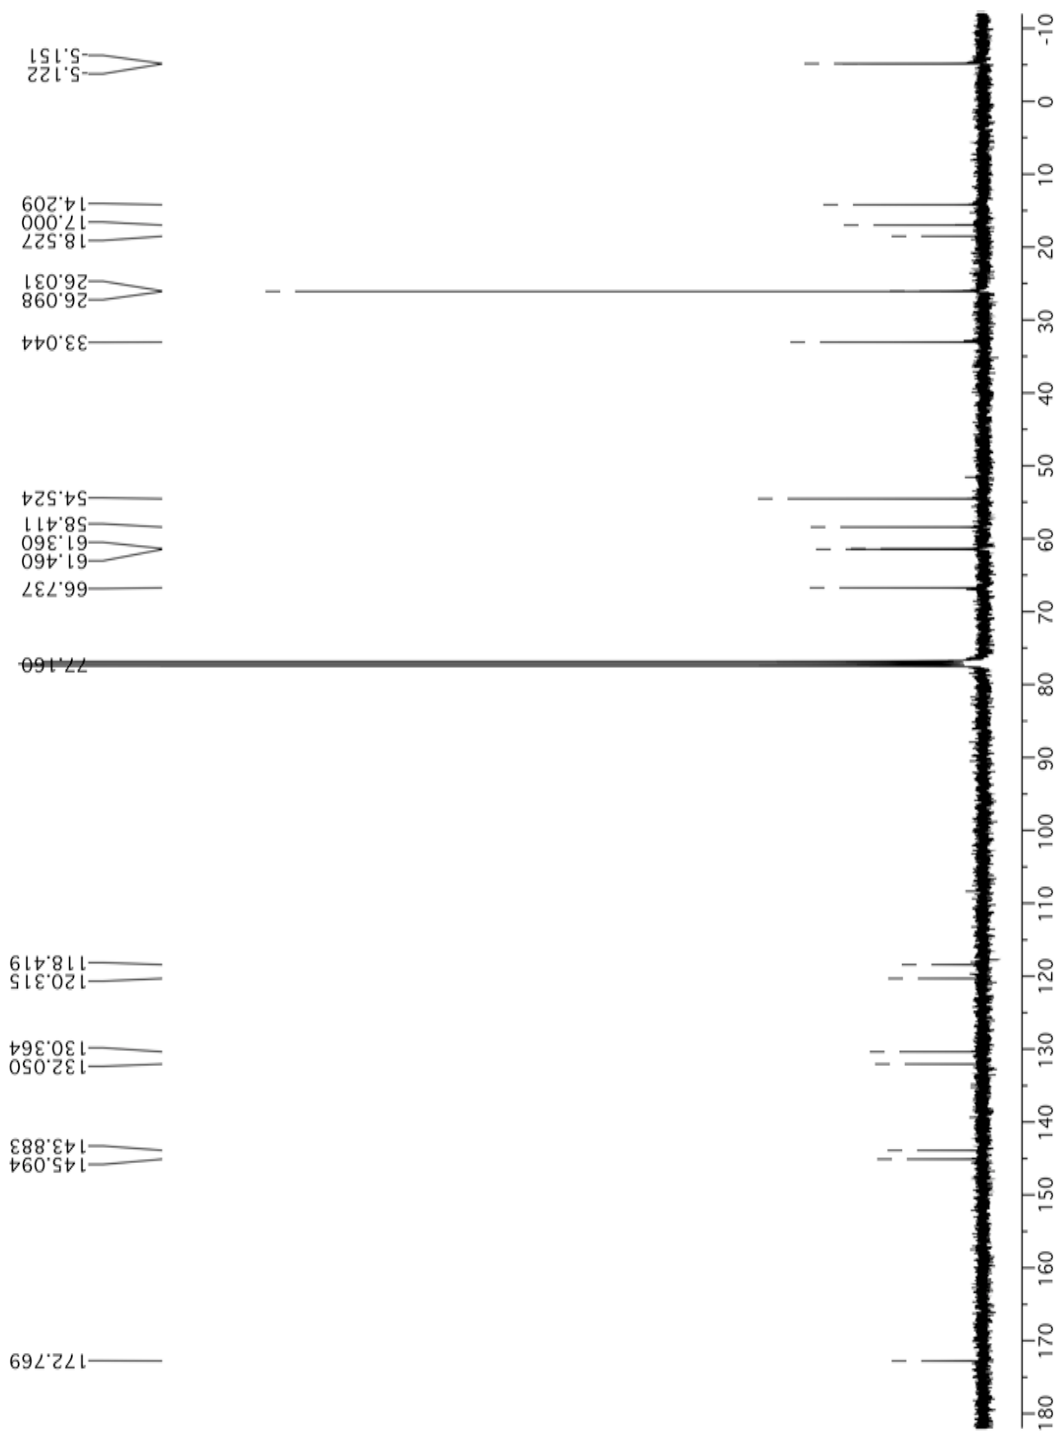

<sup>13</sup>C-NMR spectrum of compound 10b (101 MHz, CDCl<sub>3</sub>)

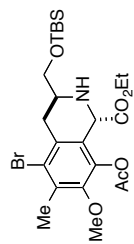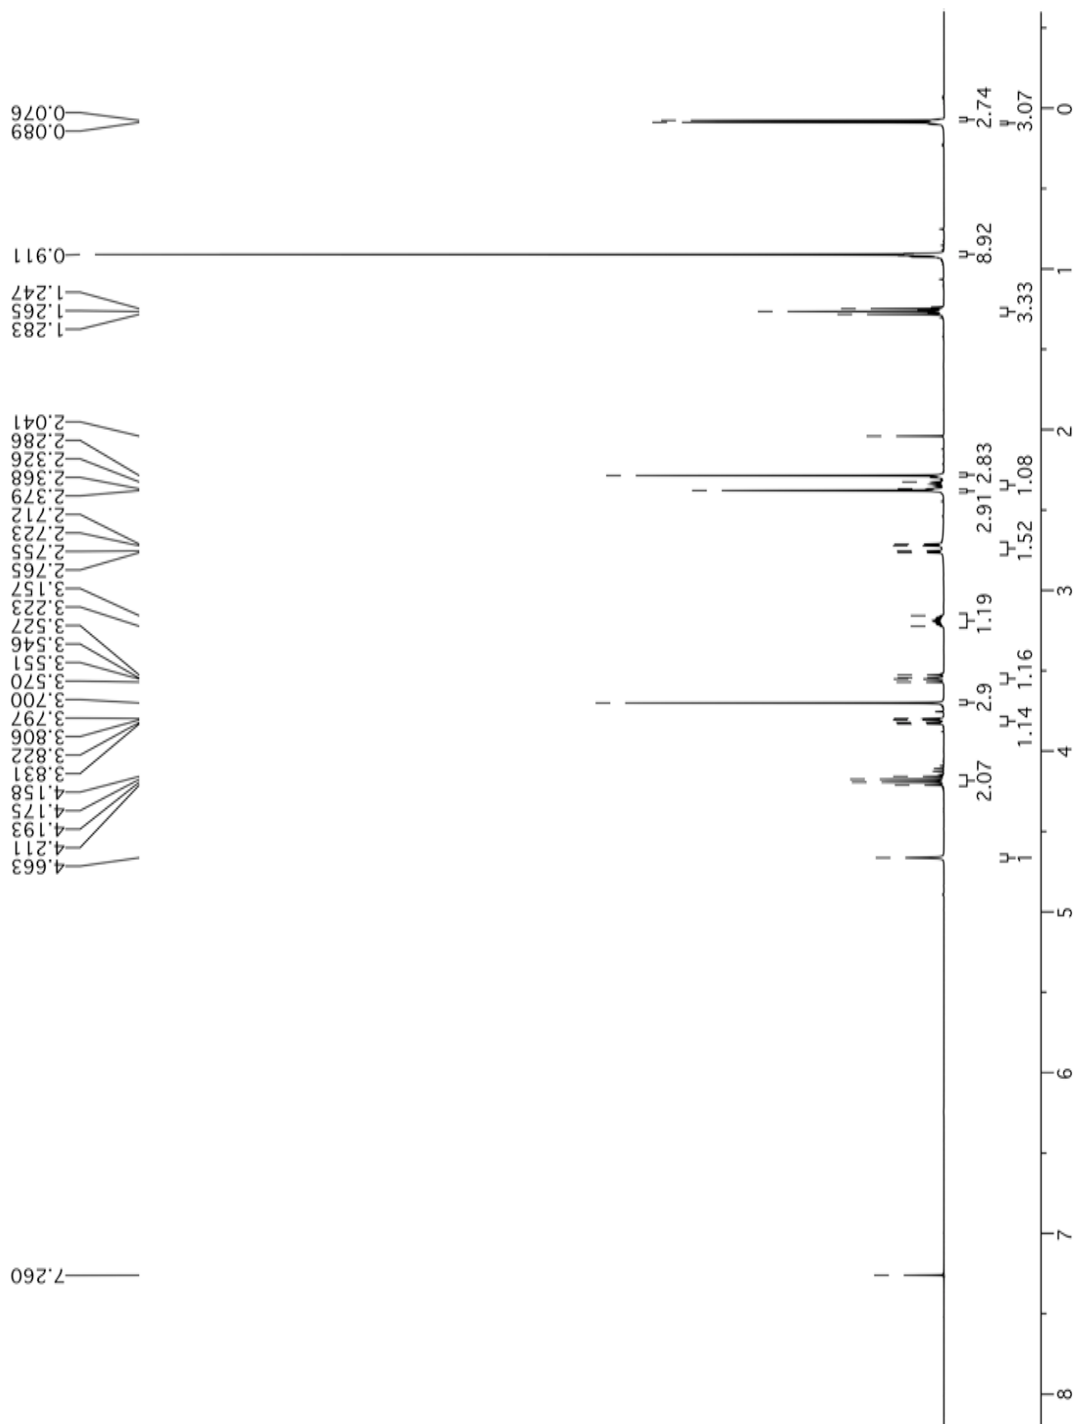

**<sup>1</sup>H-NMR spectrum of compound 11 (400 MHz, CDCl<sub>3</sub>)**

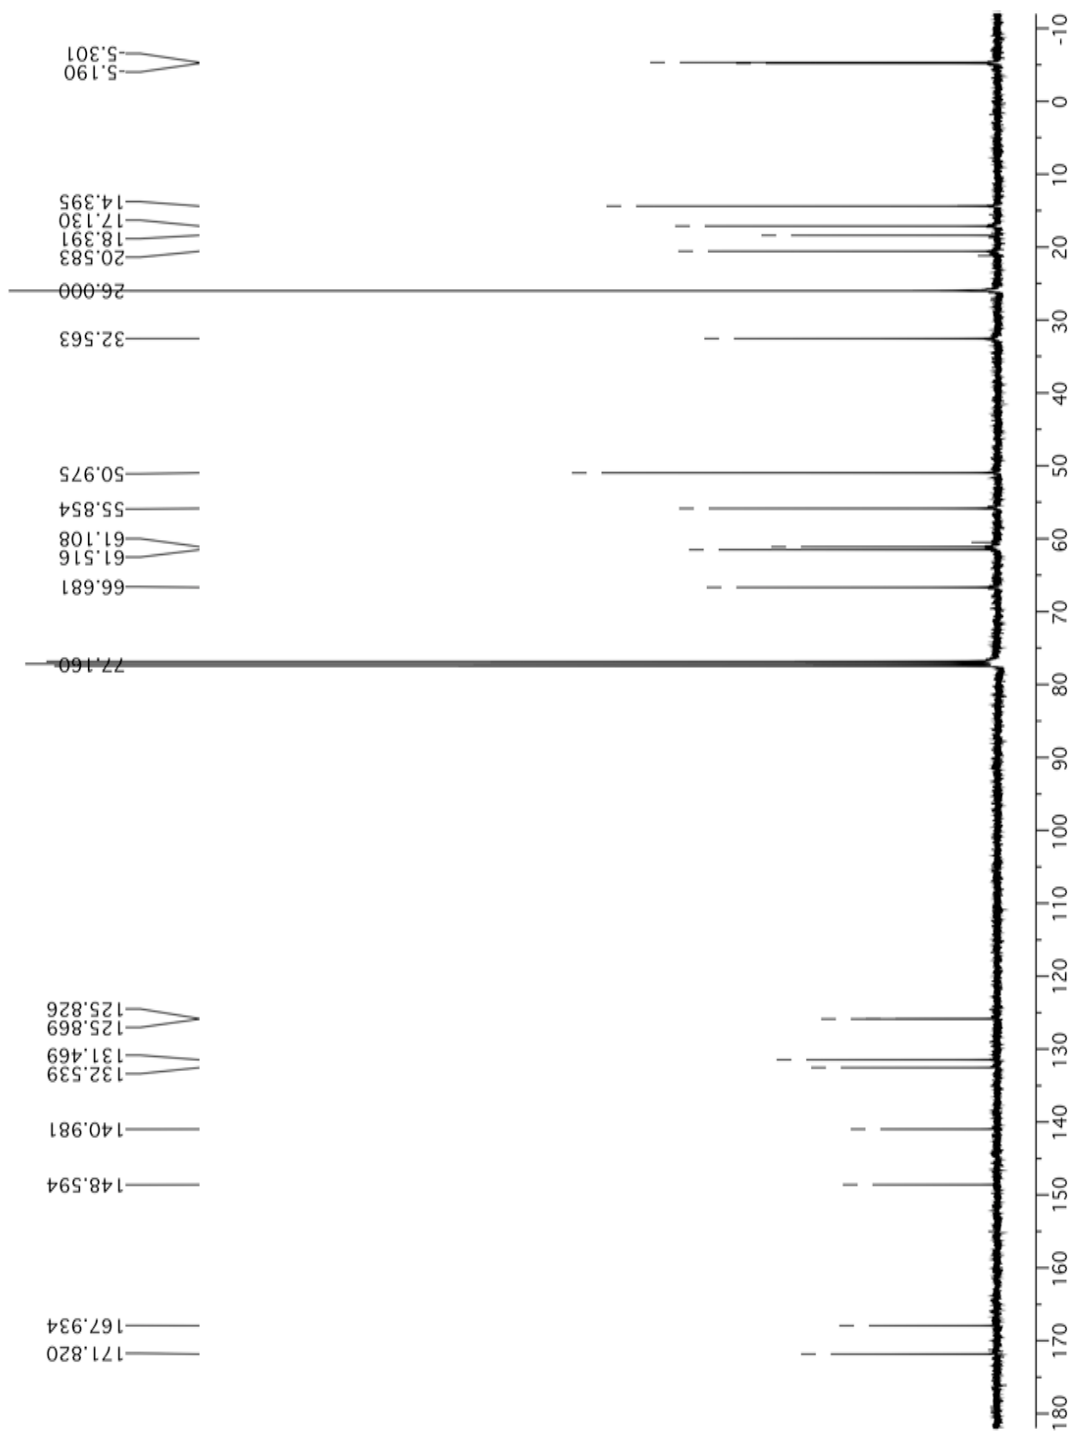

<sup>13</sup>C-NMR spectrum of compound 11 (101 MHz, CDCl<sub>3</sub>)

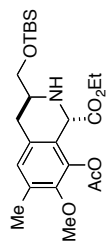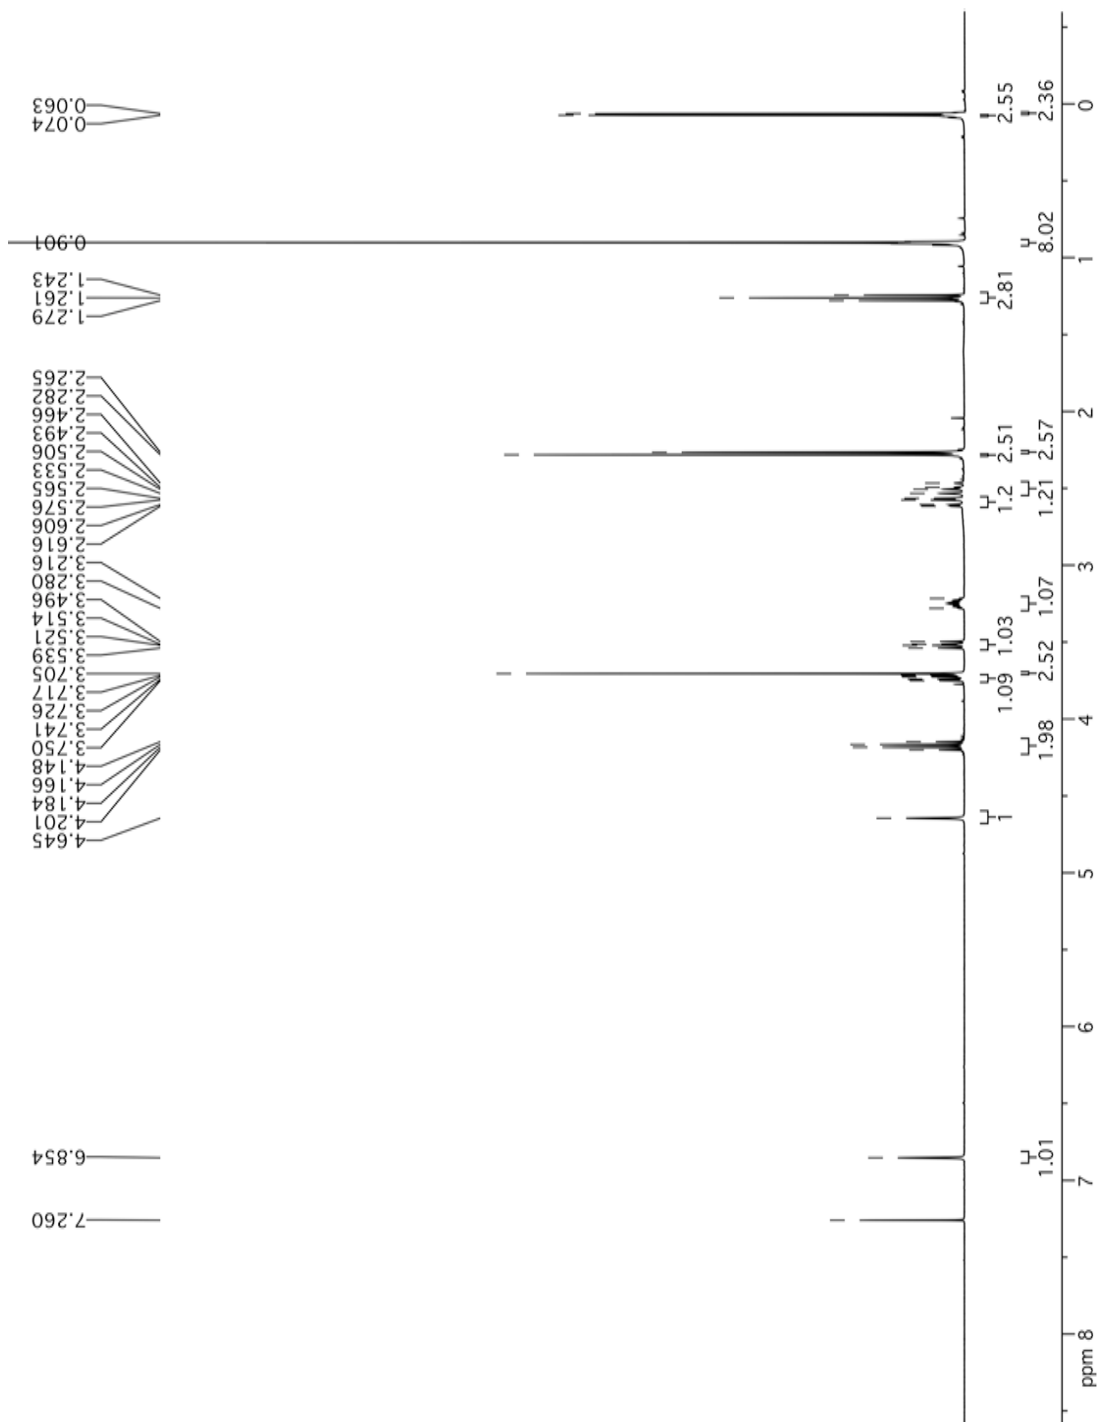

<sup>1</sup>H-NMR spectrum of compound 12 (400 MHz, CDCl<sub>3</sub>)

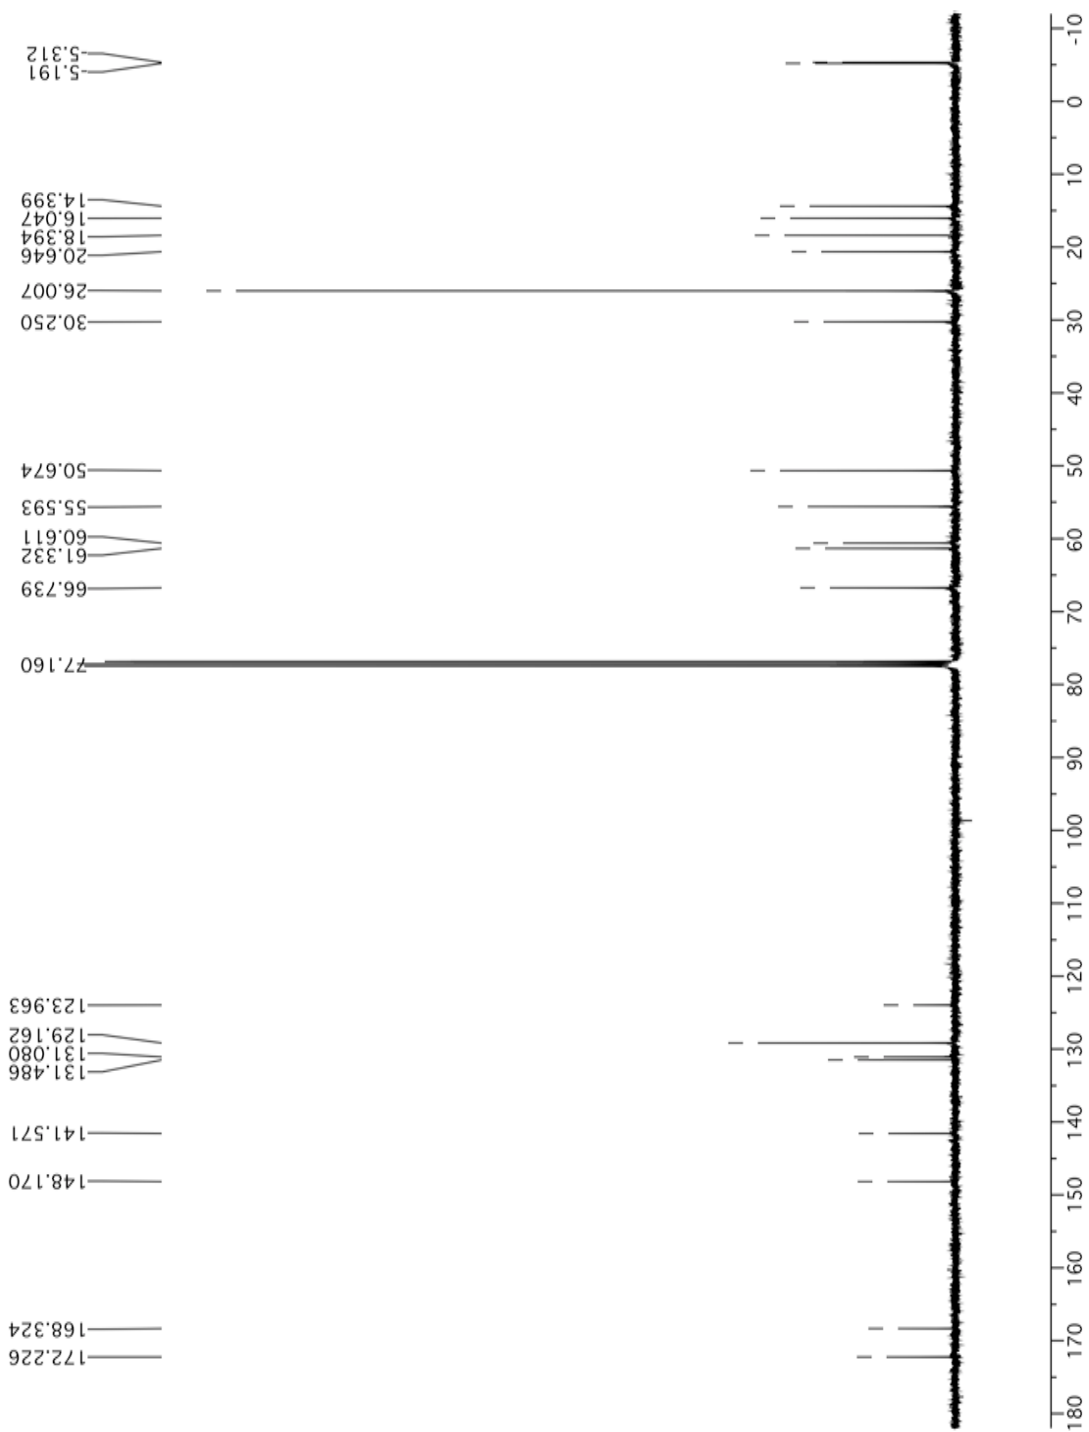

**<sup>13</sup>C-NMR spectrum of compound 12 (101 MHz, CDCl<sub>3</sub>)**

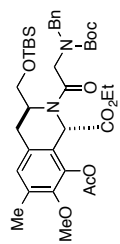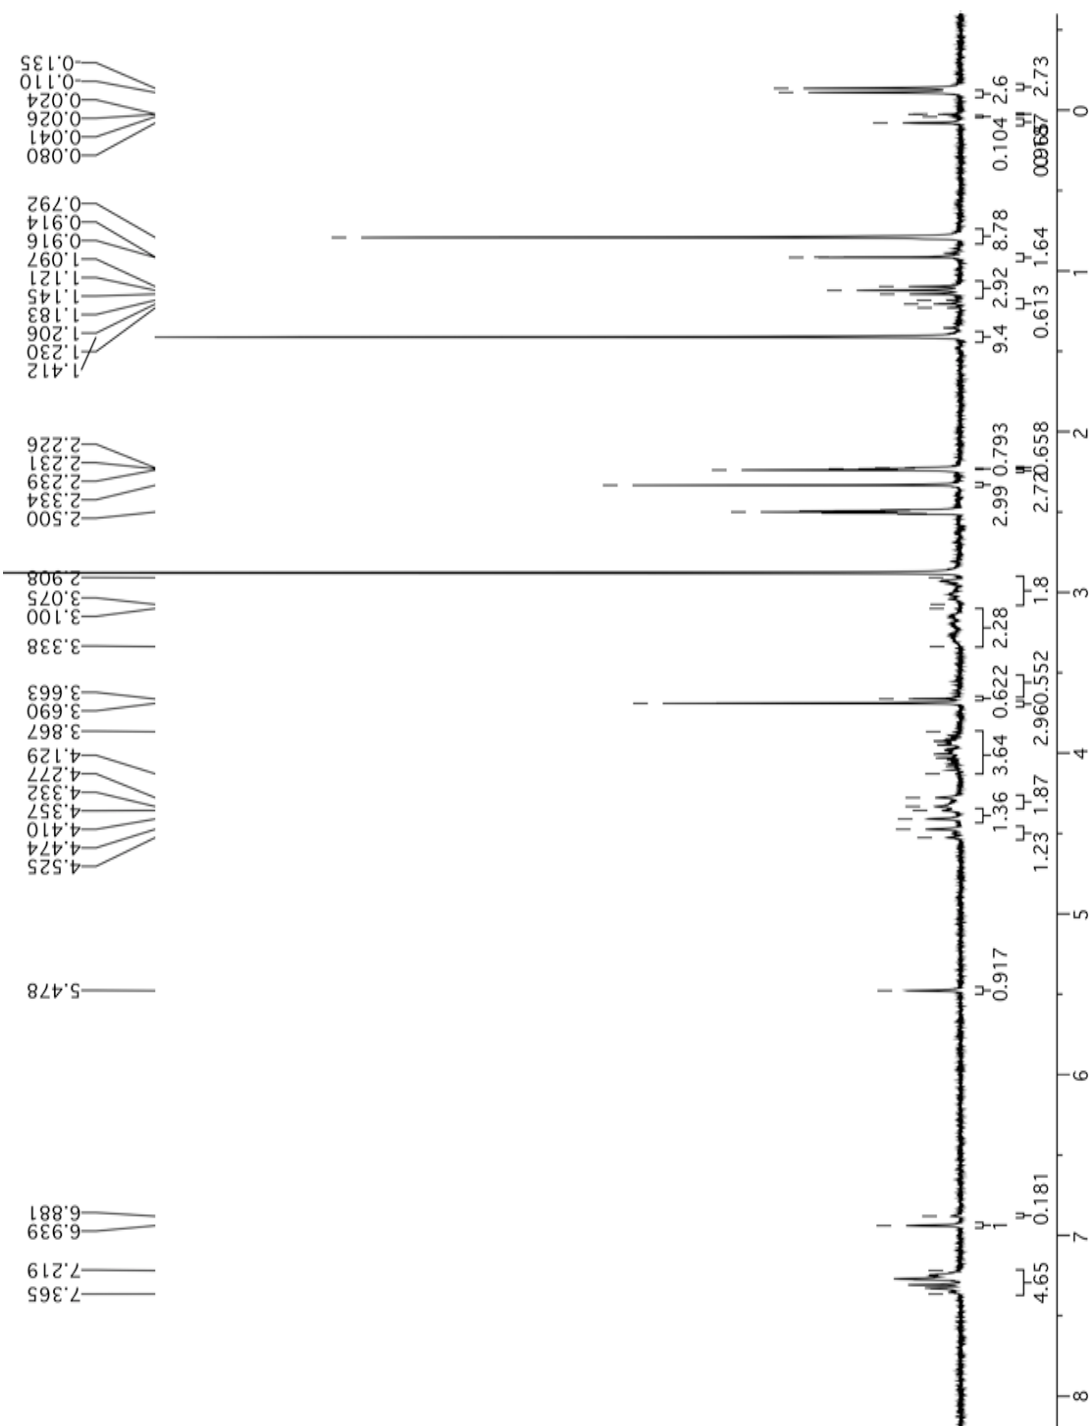

<sup>1</sup>H-NMR spectrum of compound 13 (400 MHz, DMSO-d<sub>6</sub>, 393K)

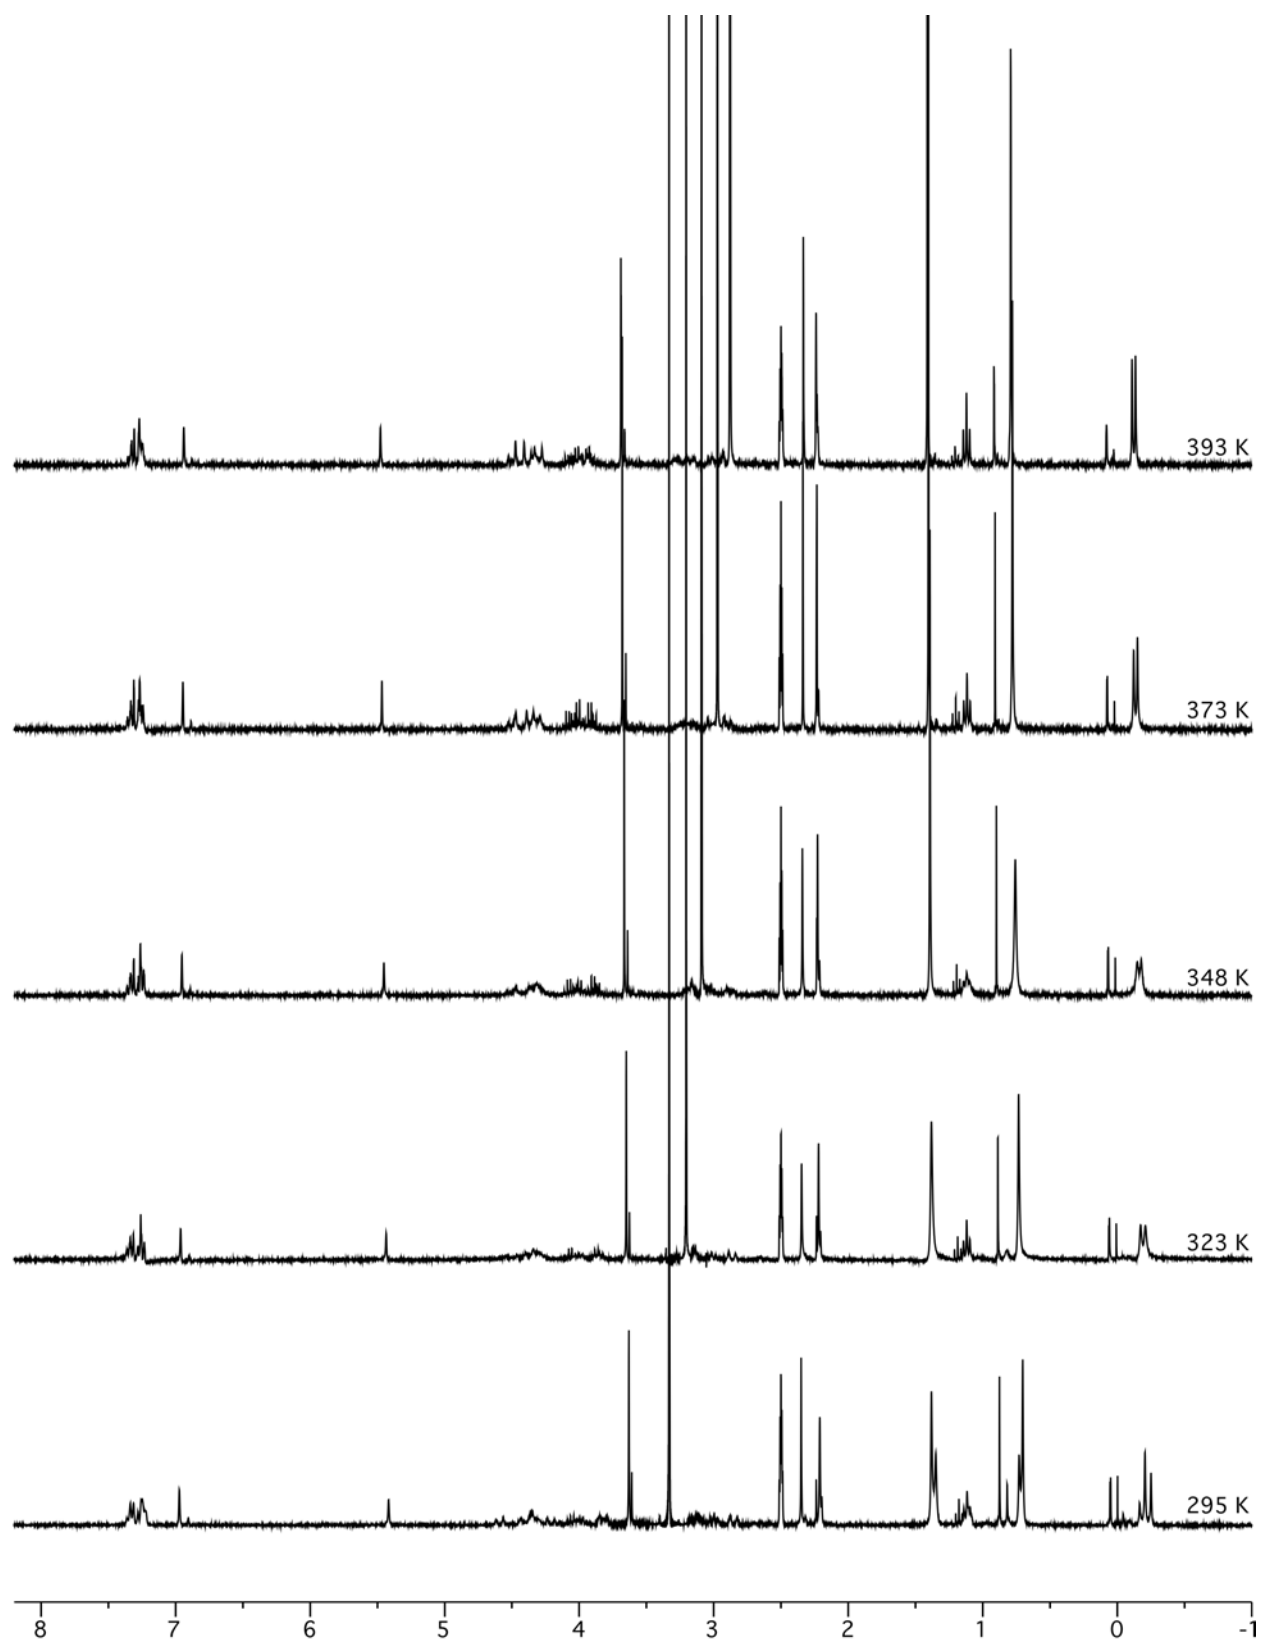

**$^1\text{H-NMR}$  spectra of compound 13 (400 MHz,  $\text{DMSO-d}_6$ , 295, 323, 348, 373 and 393K)**

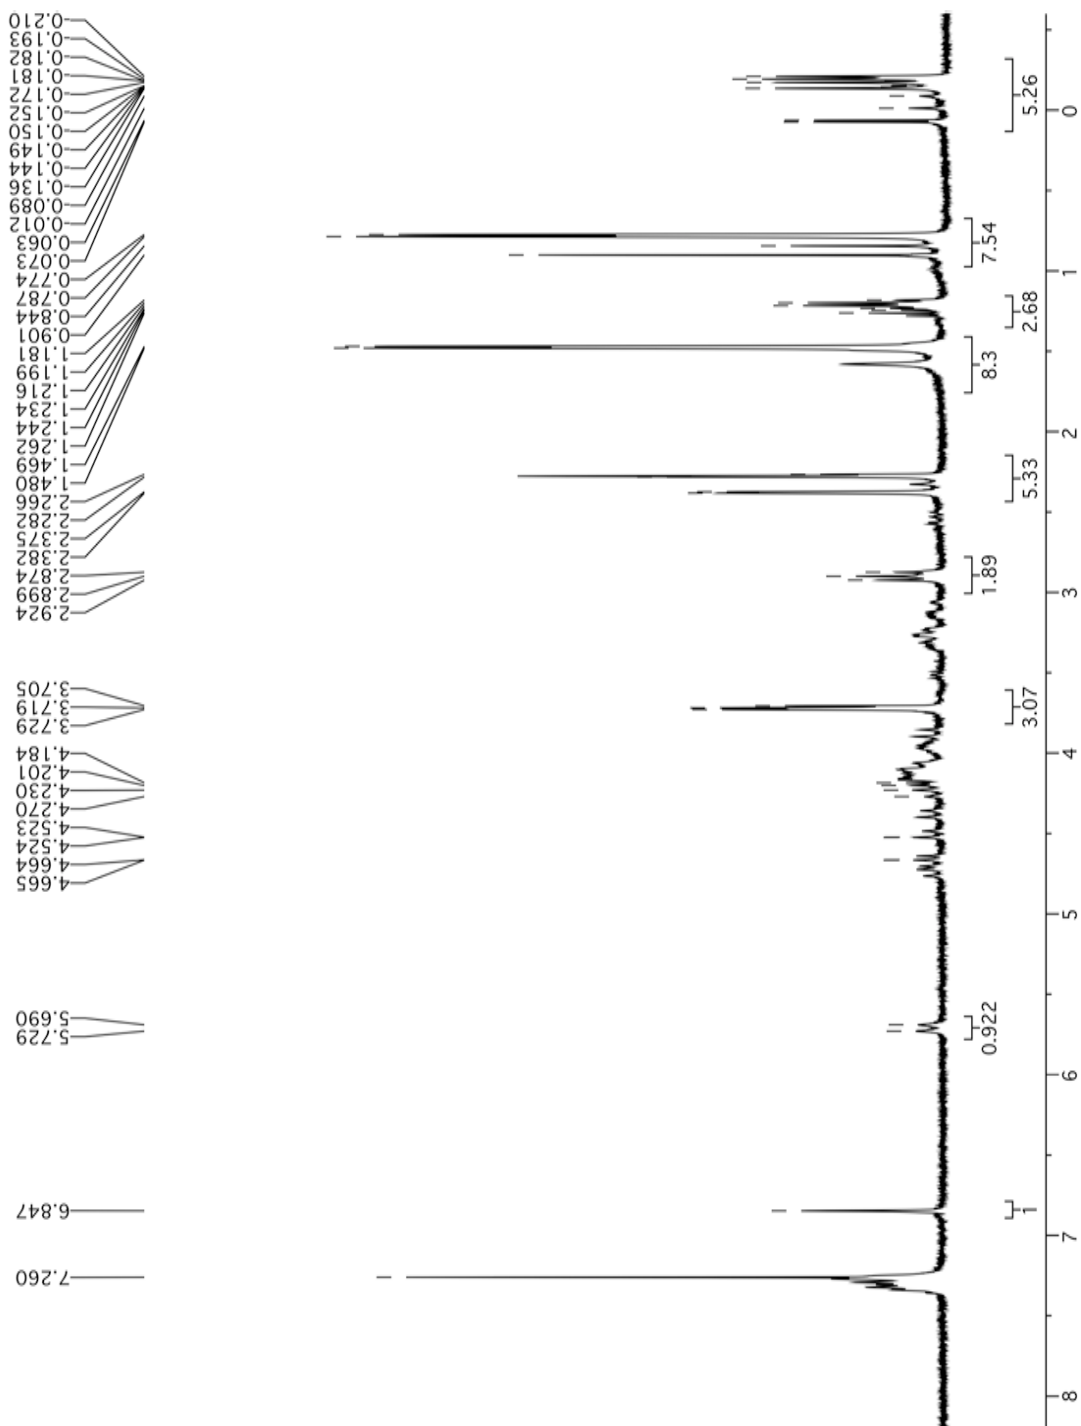

<sup>1</sup>H-NMR spectrum of compound 13 (400 MHz, CDCl<sub>3</sub>)



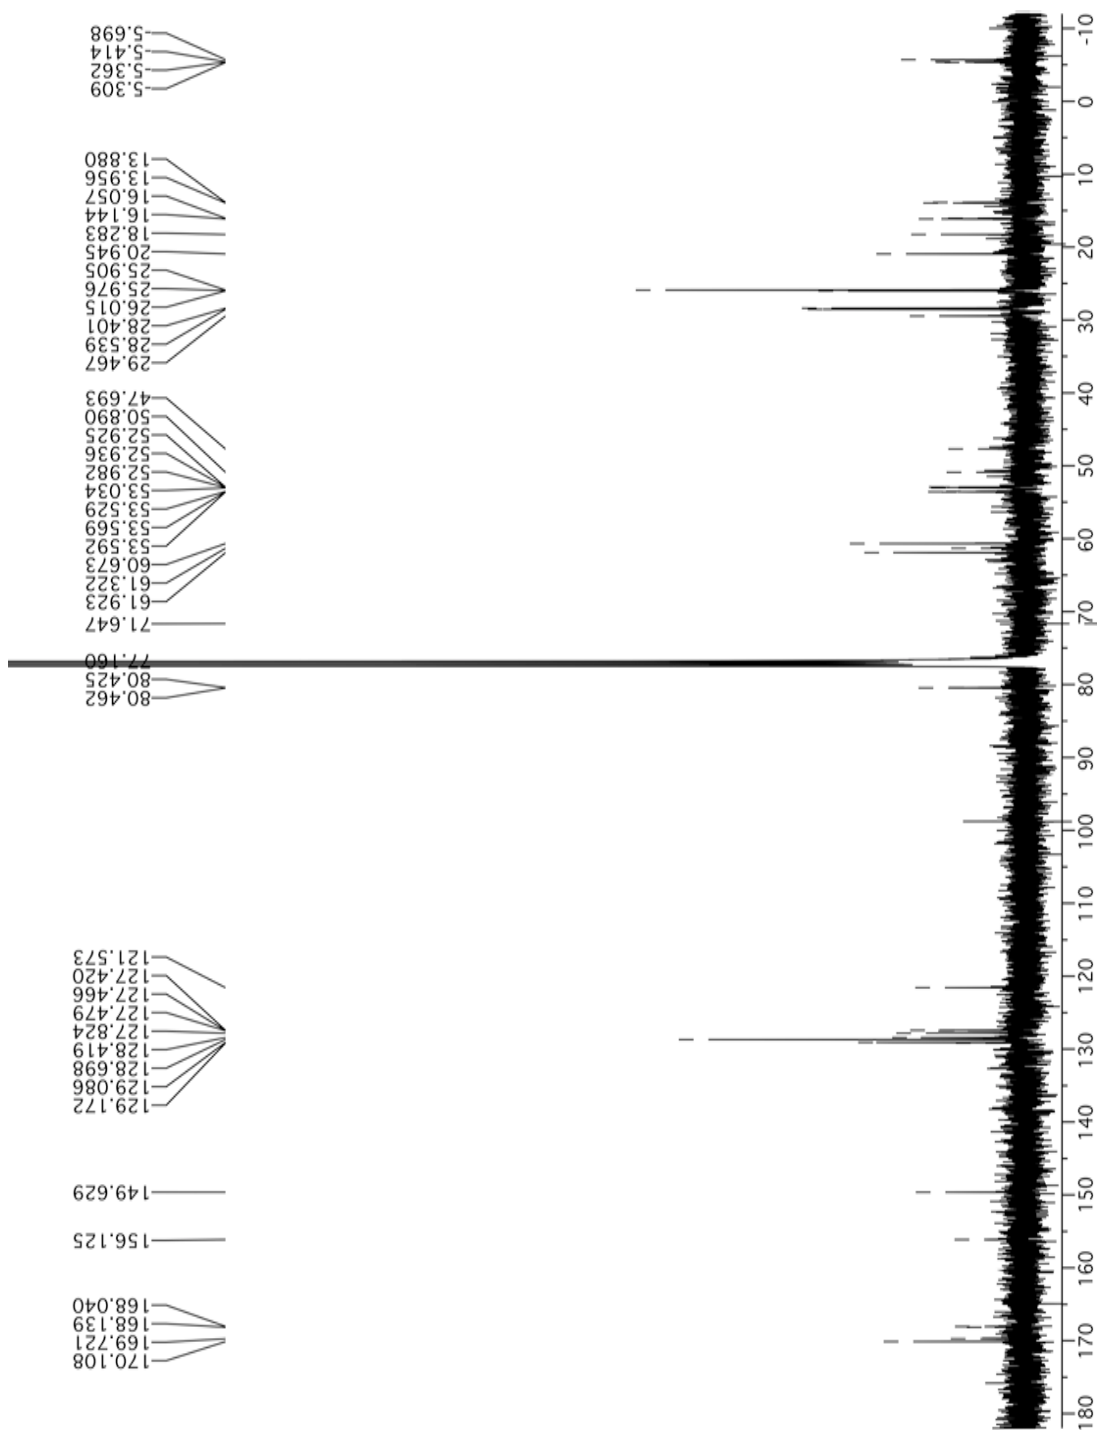

<sup>13</sup>C-NMR spectrum of compound 13 (101 MHz, CDCl<sub>3</sub>)

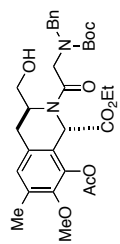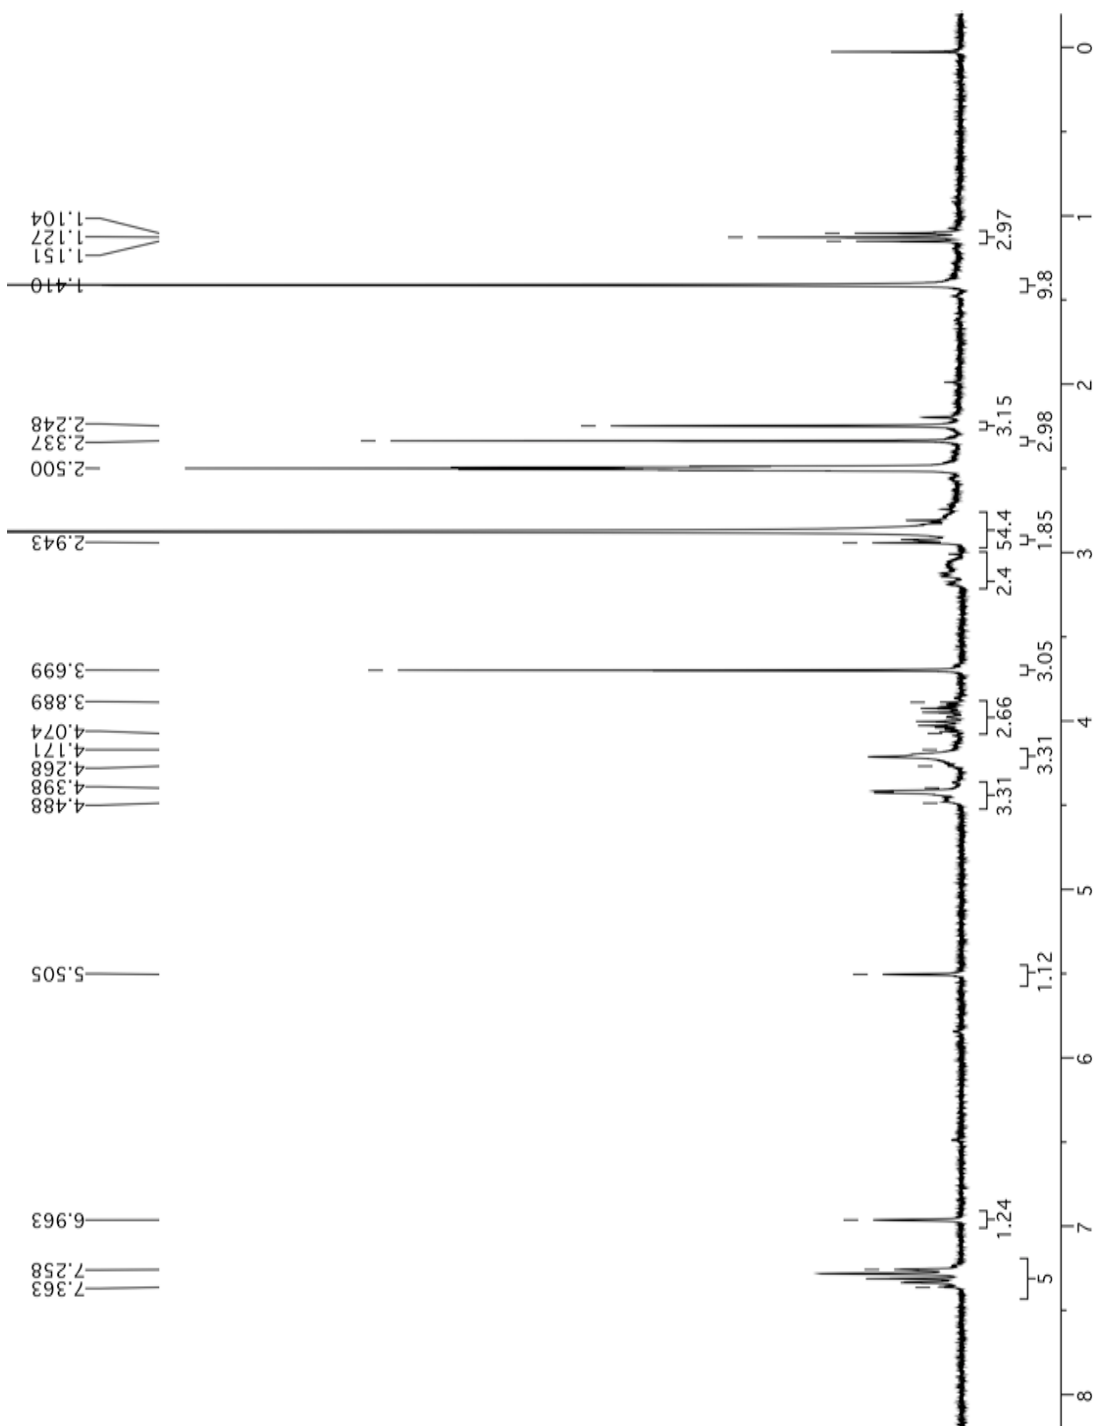

<sup>1</sup>H-NMR spectrum of compound 14 (400 MHz, DMSO-d<sub>6</sub>, 393K)

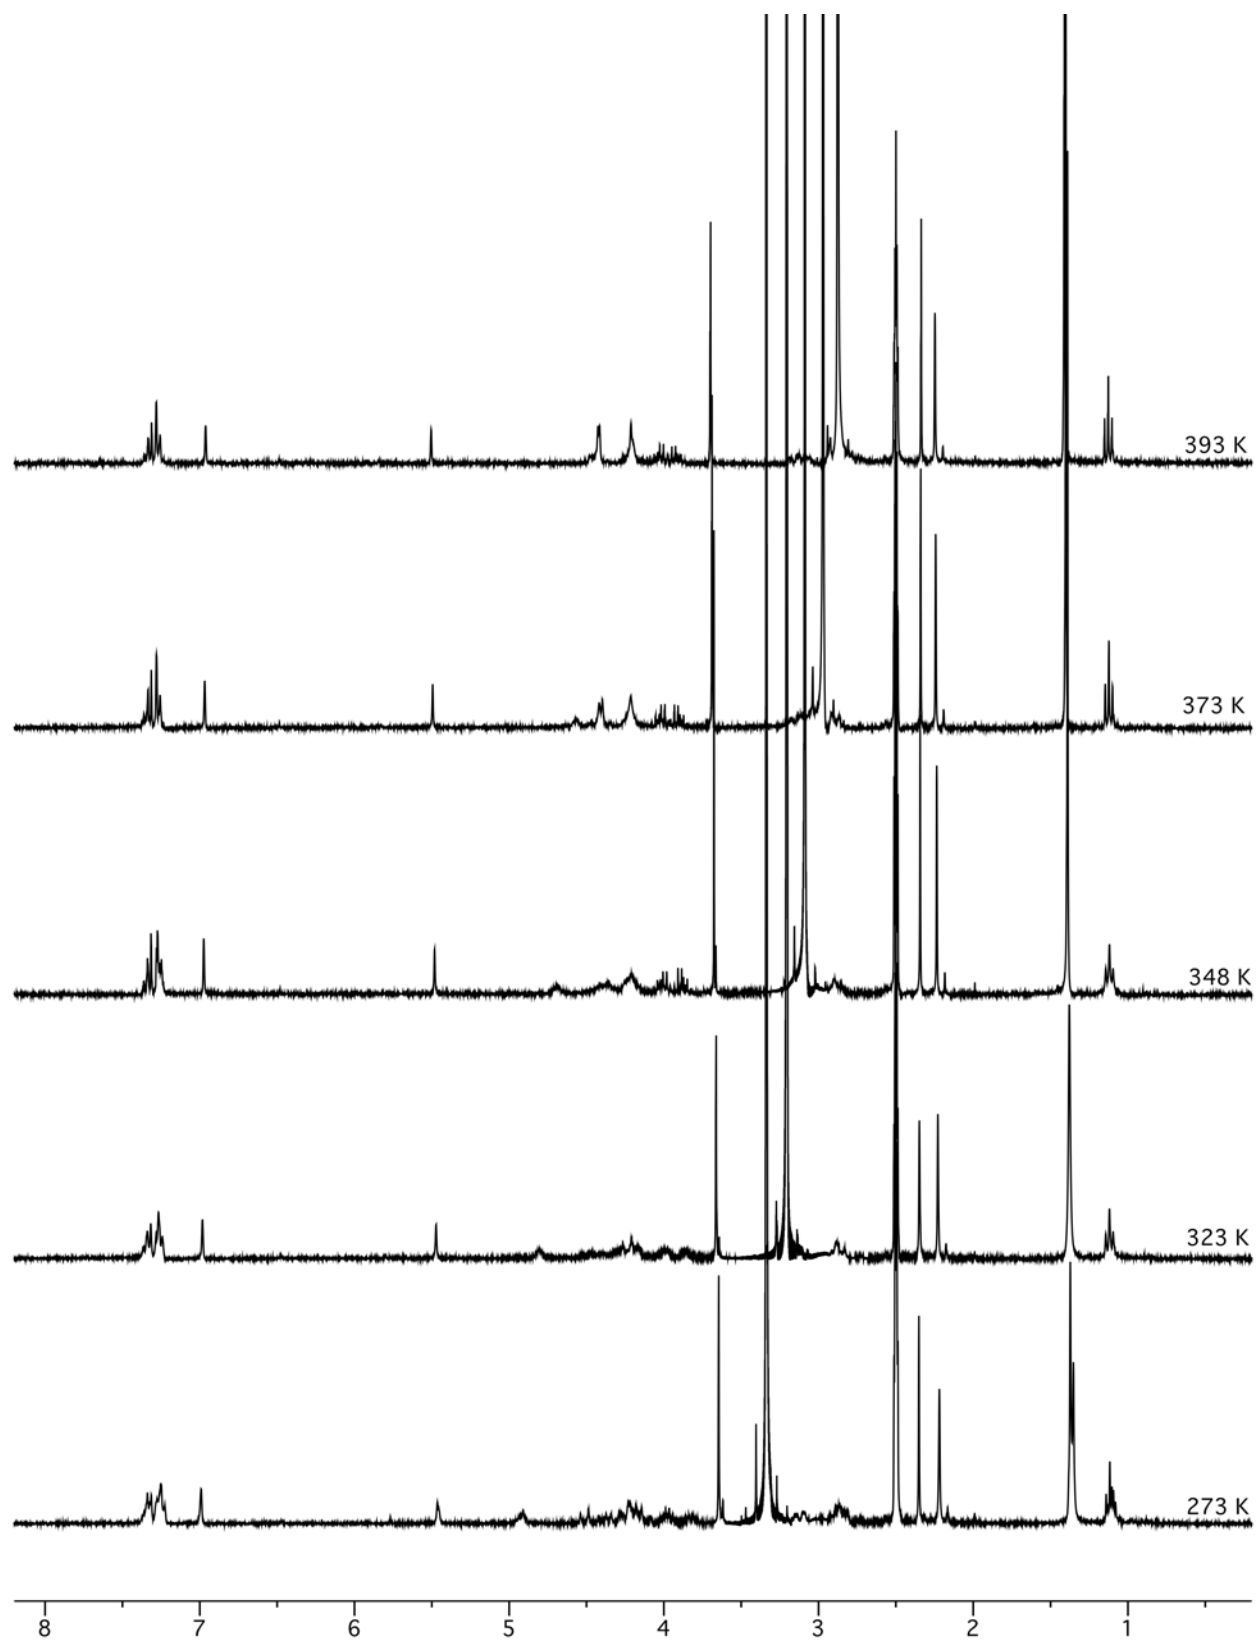

**<sup>1</sup>H-NMR spectra of compound 14 (400 MHz, DMSO-d<sub>6</sub>, 295, 323, 348, 373 and 393K)**

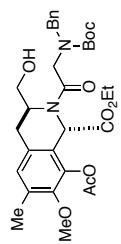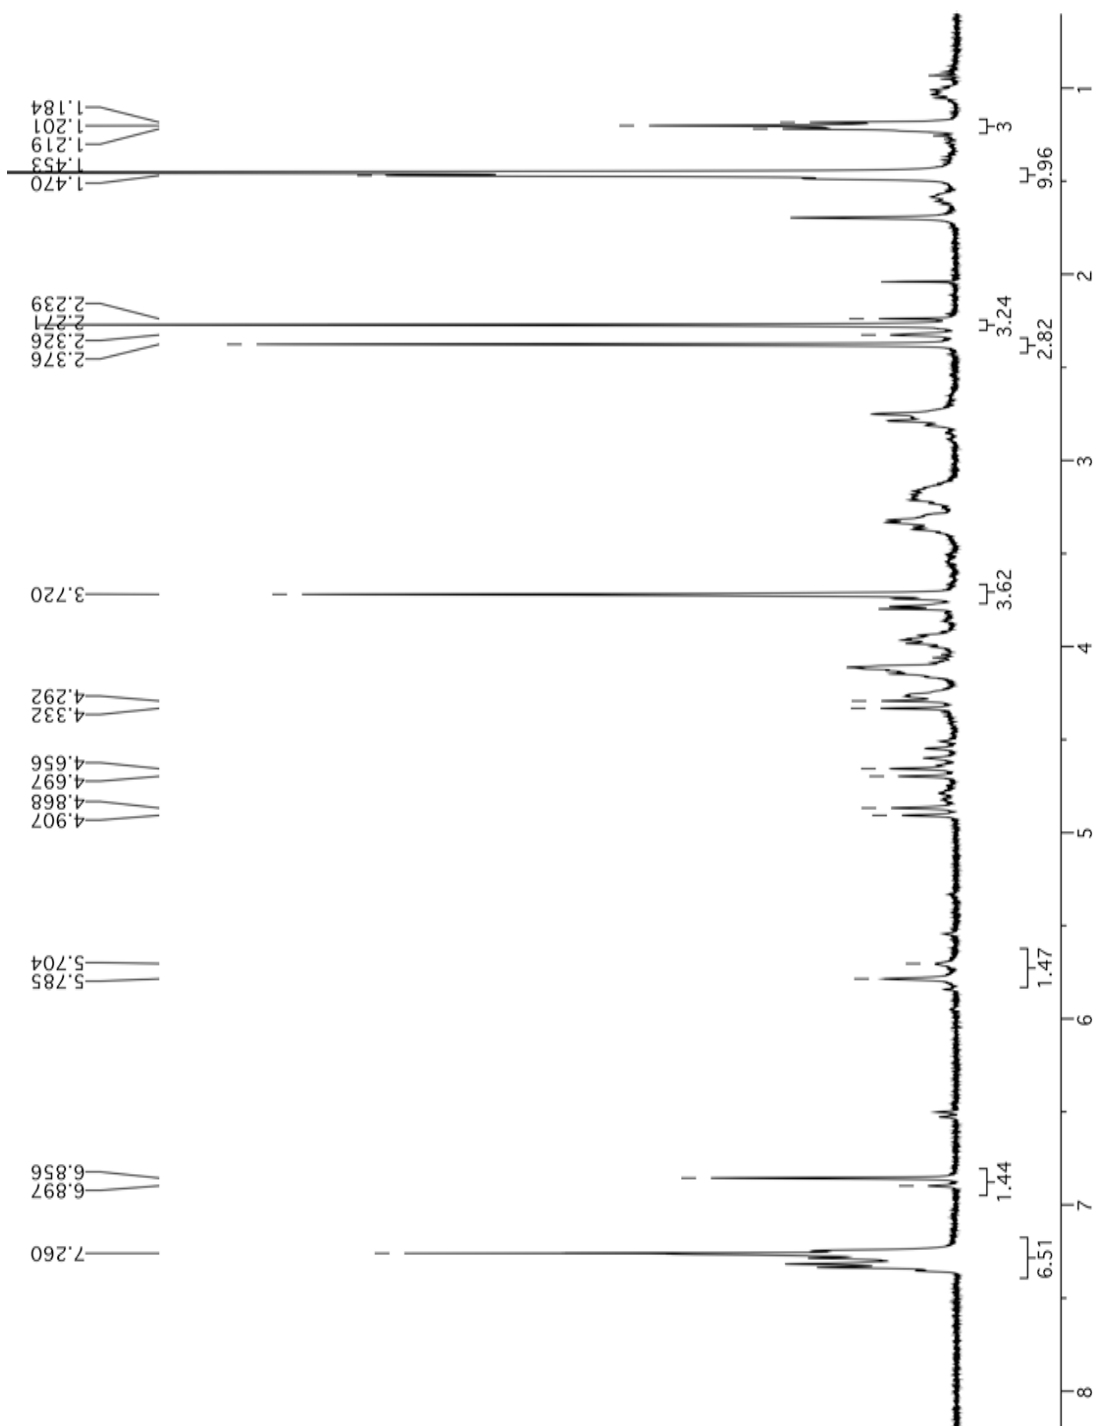

<sup>1</sup>H-NMR spectrum of compound 14 (400 MHz, CDCl<sub>3</sub>)

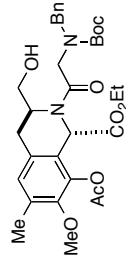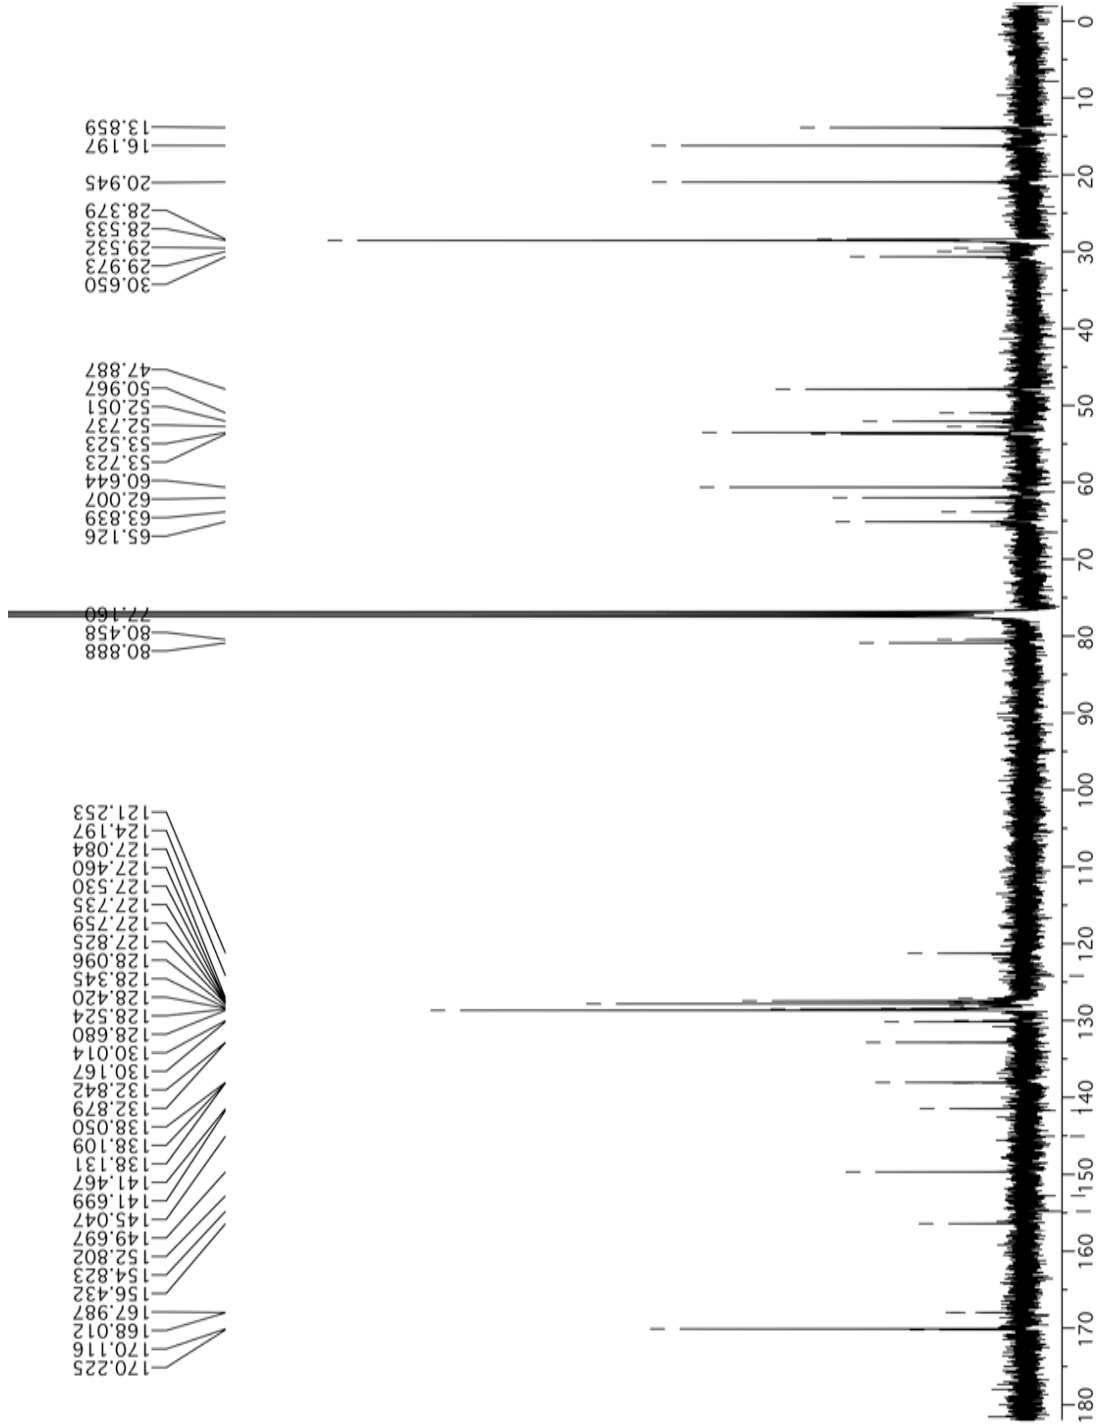

<sup>13</sup>C-NMR spectrum of compound 14 (101 MHz, CDCl<sub>3</sub>)

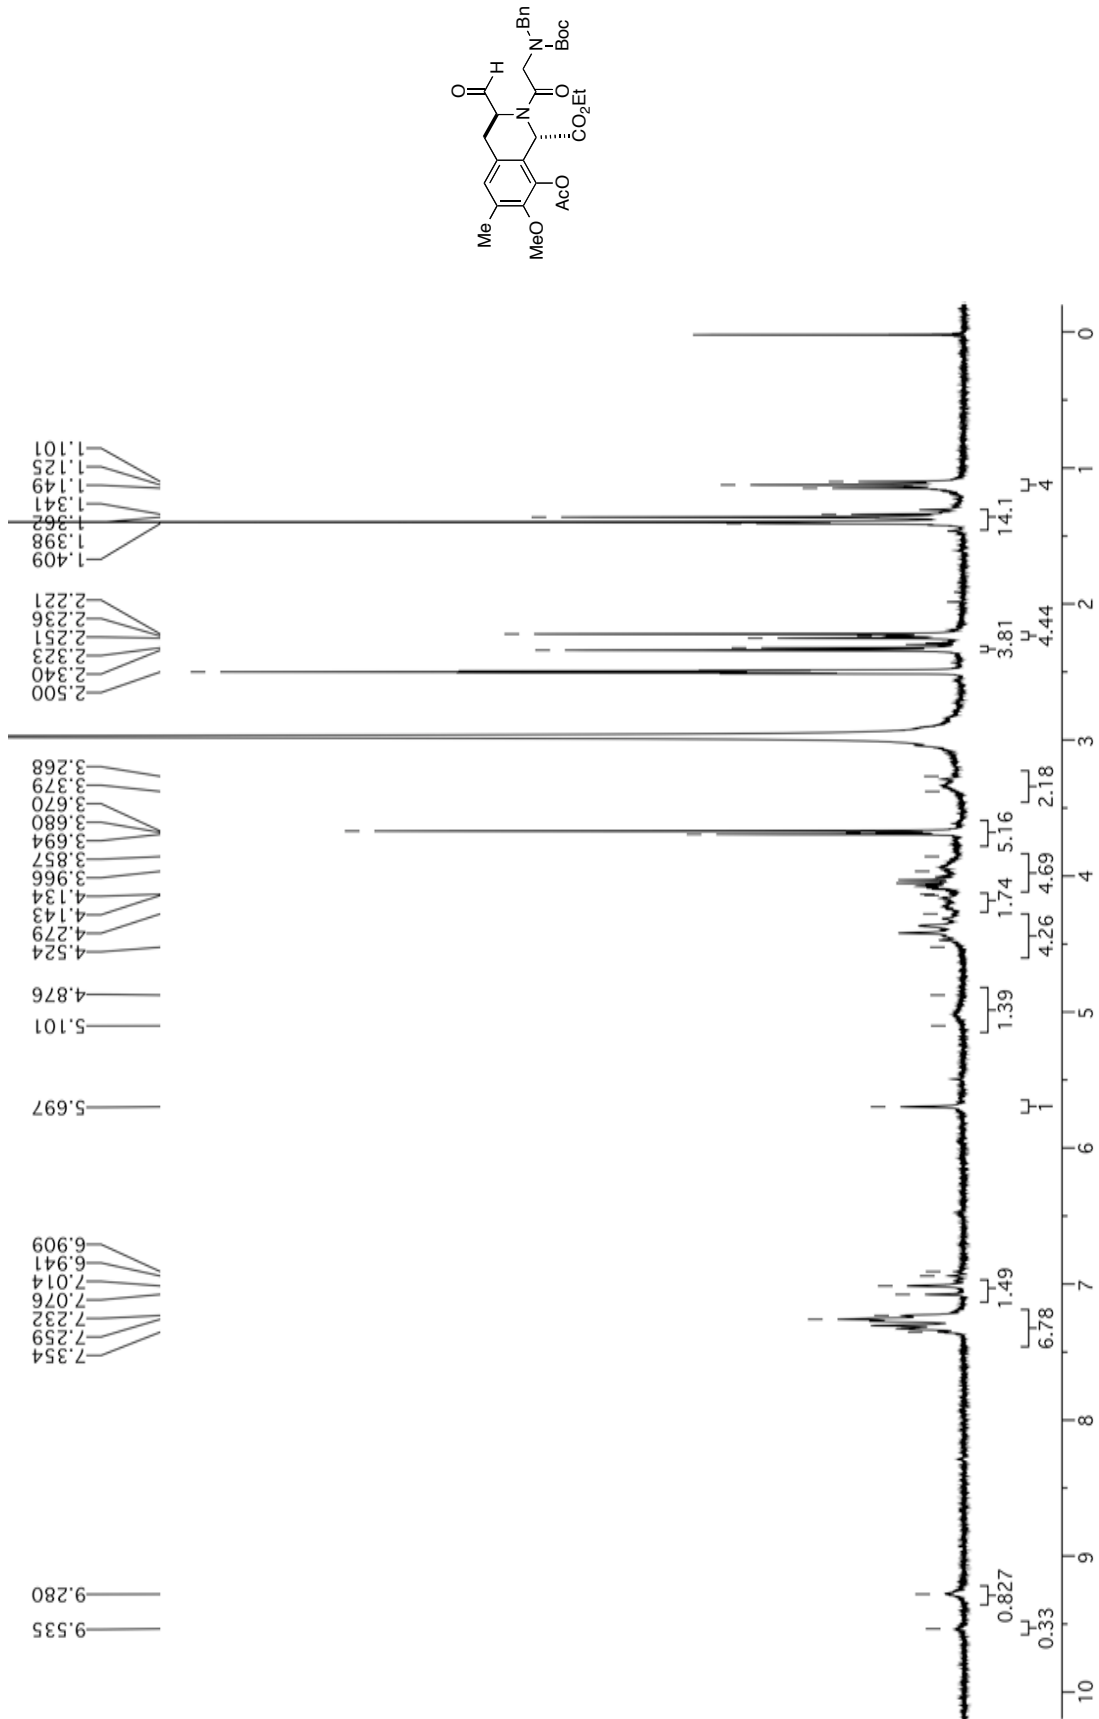

<sup>1</sup>H-NMR spectrum of compound 15 (400 MHz, DMSO-d<sub>6</sub>, 373K)

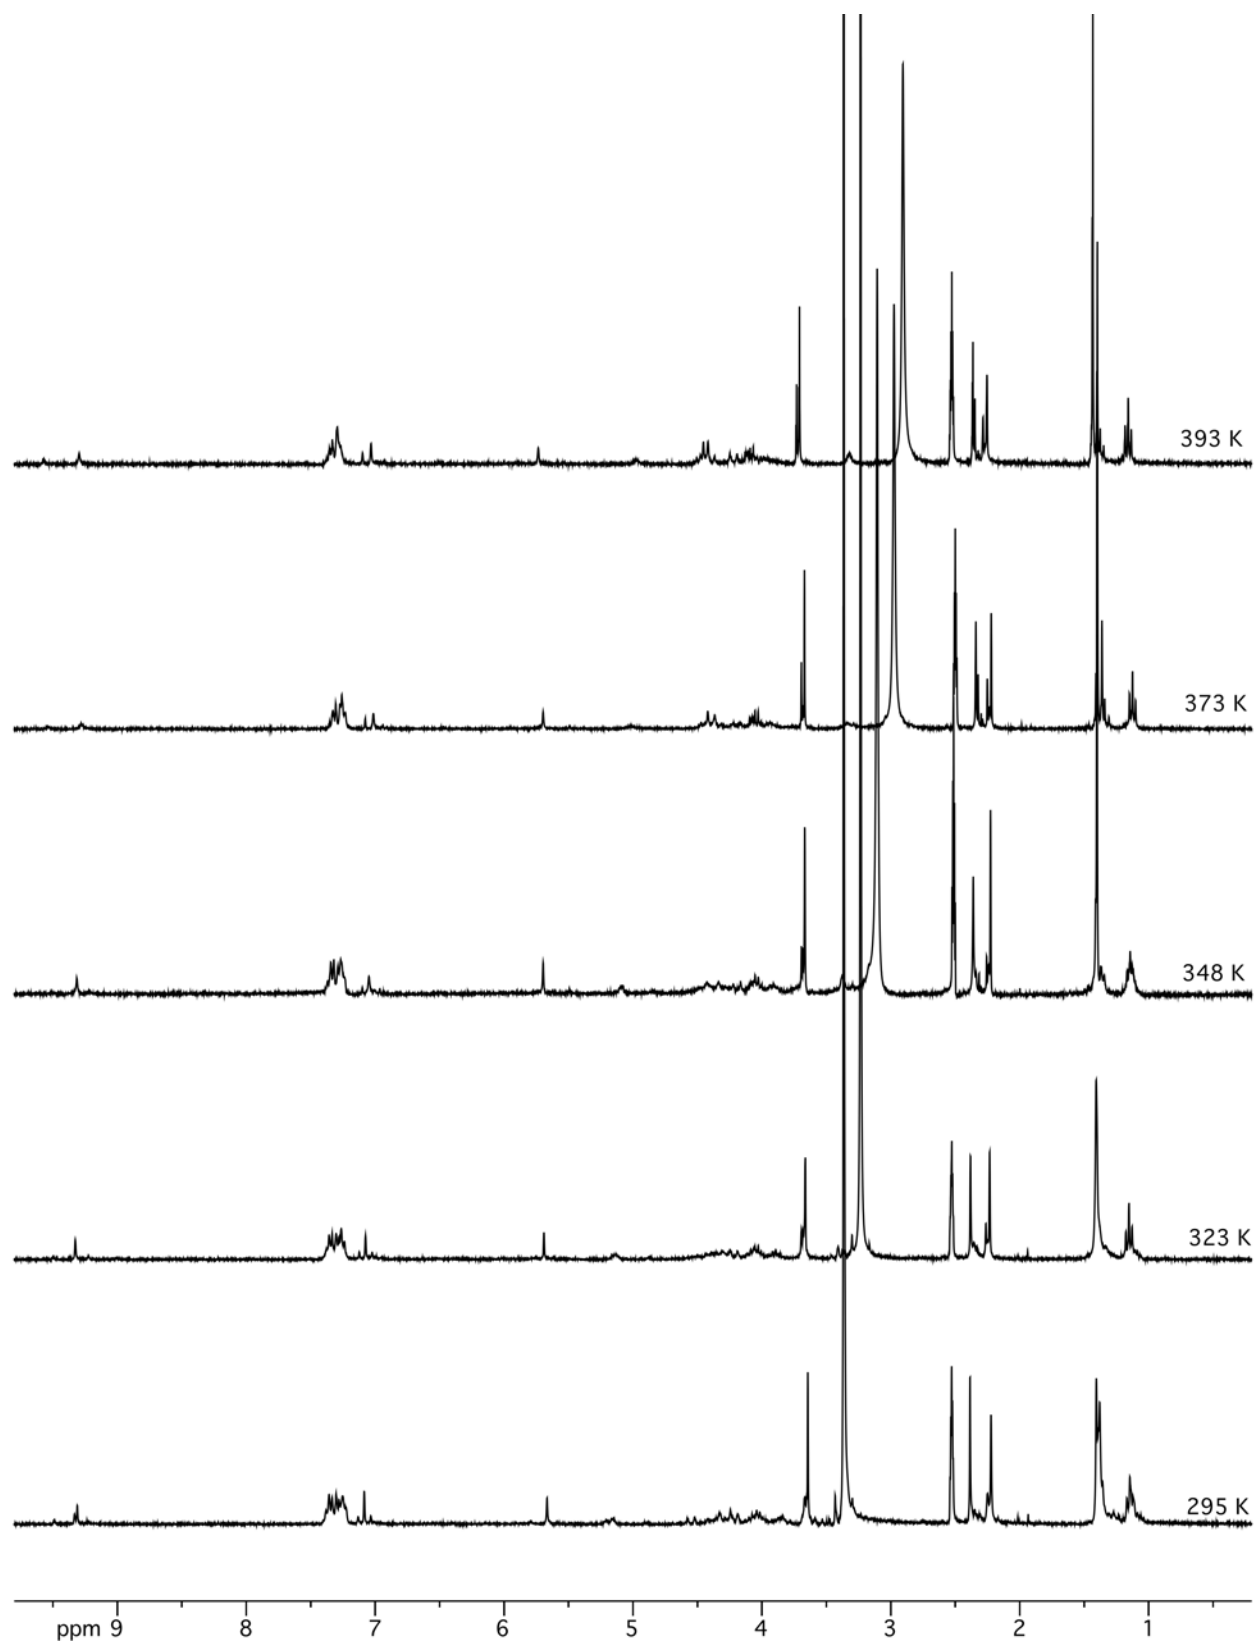

**<sup>1</sup>H-NMR spectra of compound 15 (400 MHz, DMSO-d<sub>6</sub>, 295, 323, 348, 373 and 393K)**

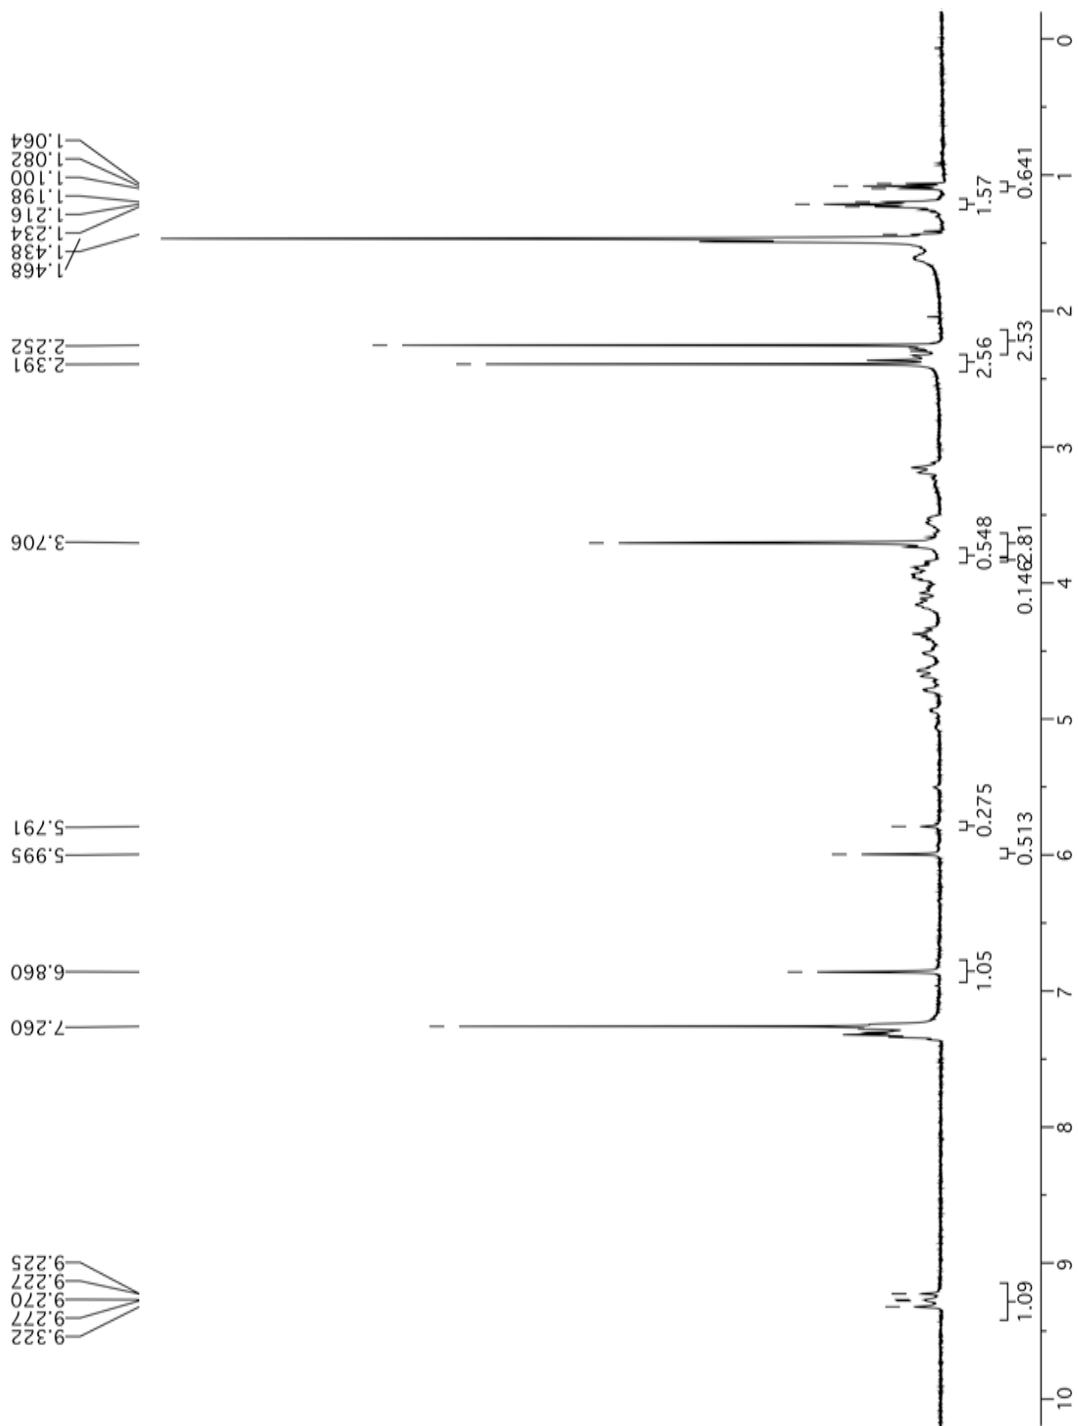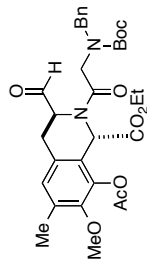

<sup>1</sup>H-NMR spectrum of compound 15 (400 MHz, CDCl<sub>3</sub>)



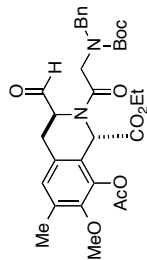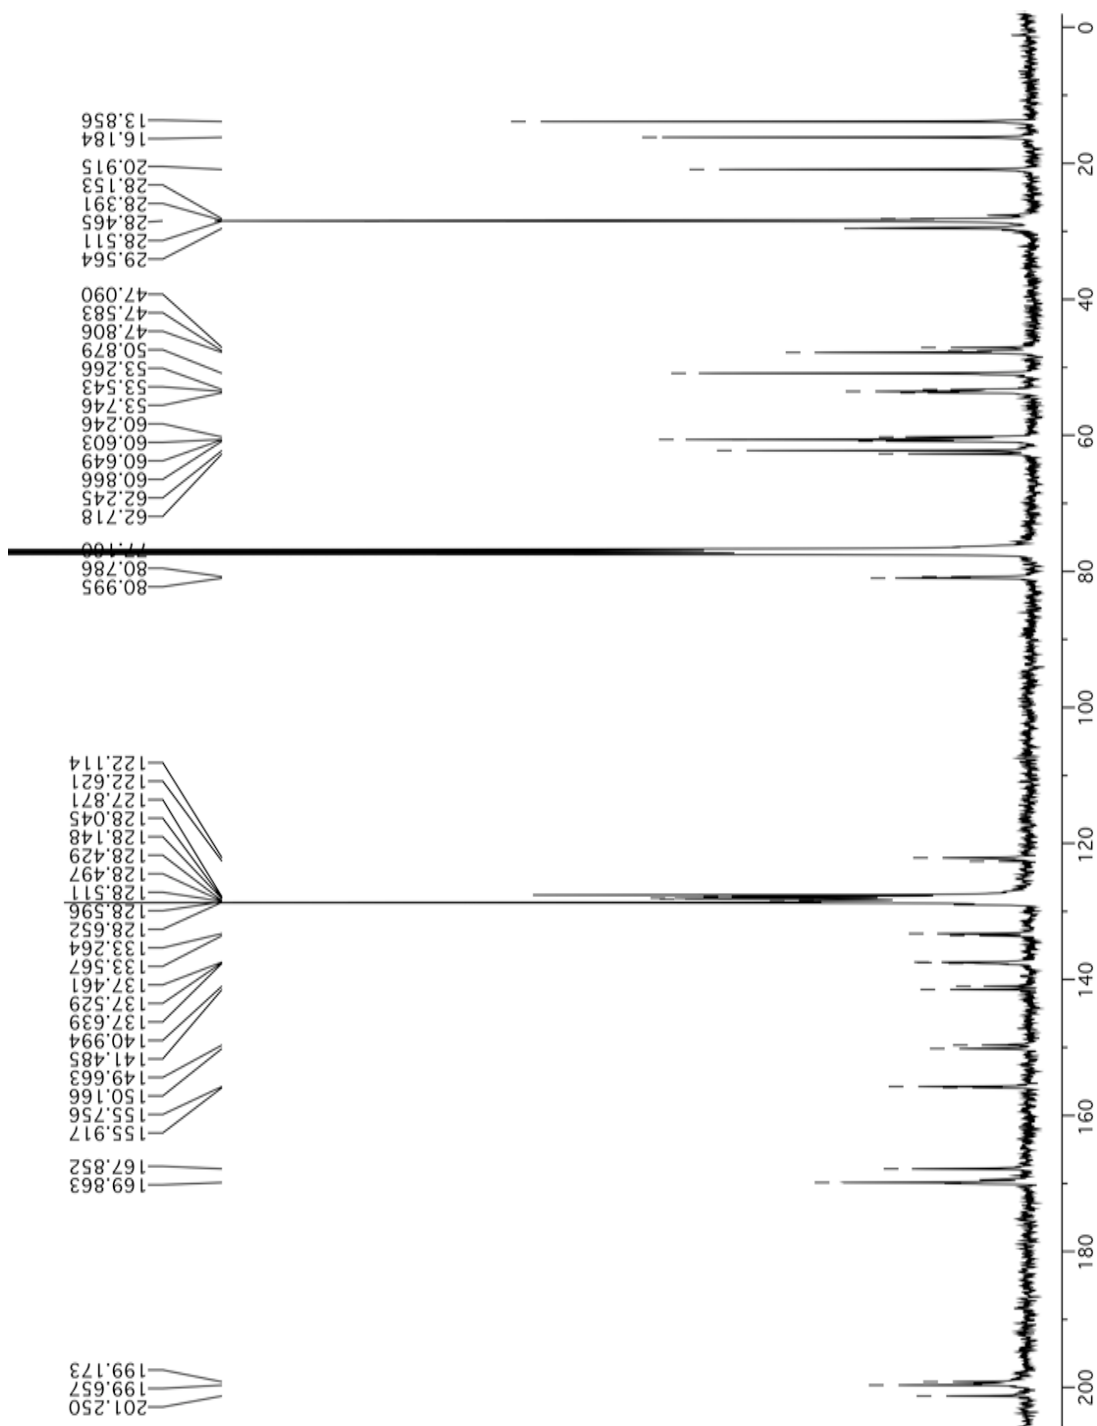

<sup>13</sup>C-NMR spectrum of compound 15 (101 MHz, CDCl<sub>3</sub>)

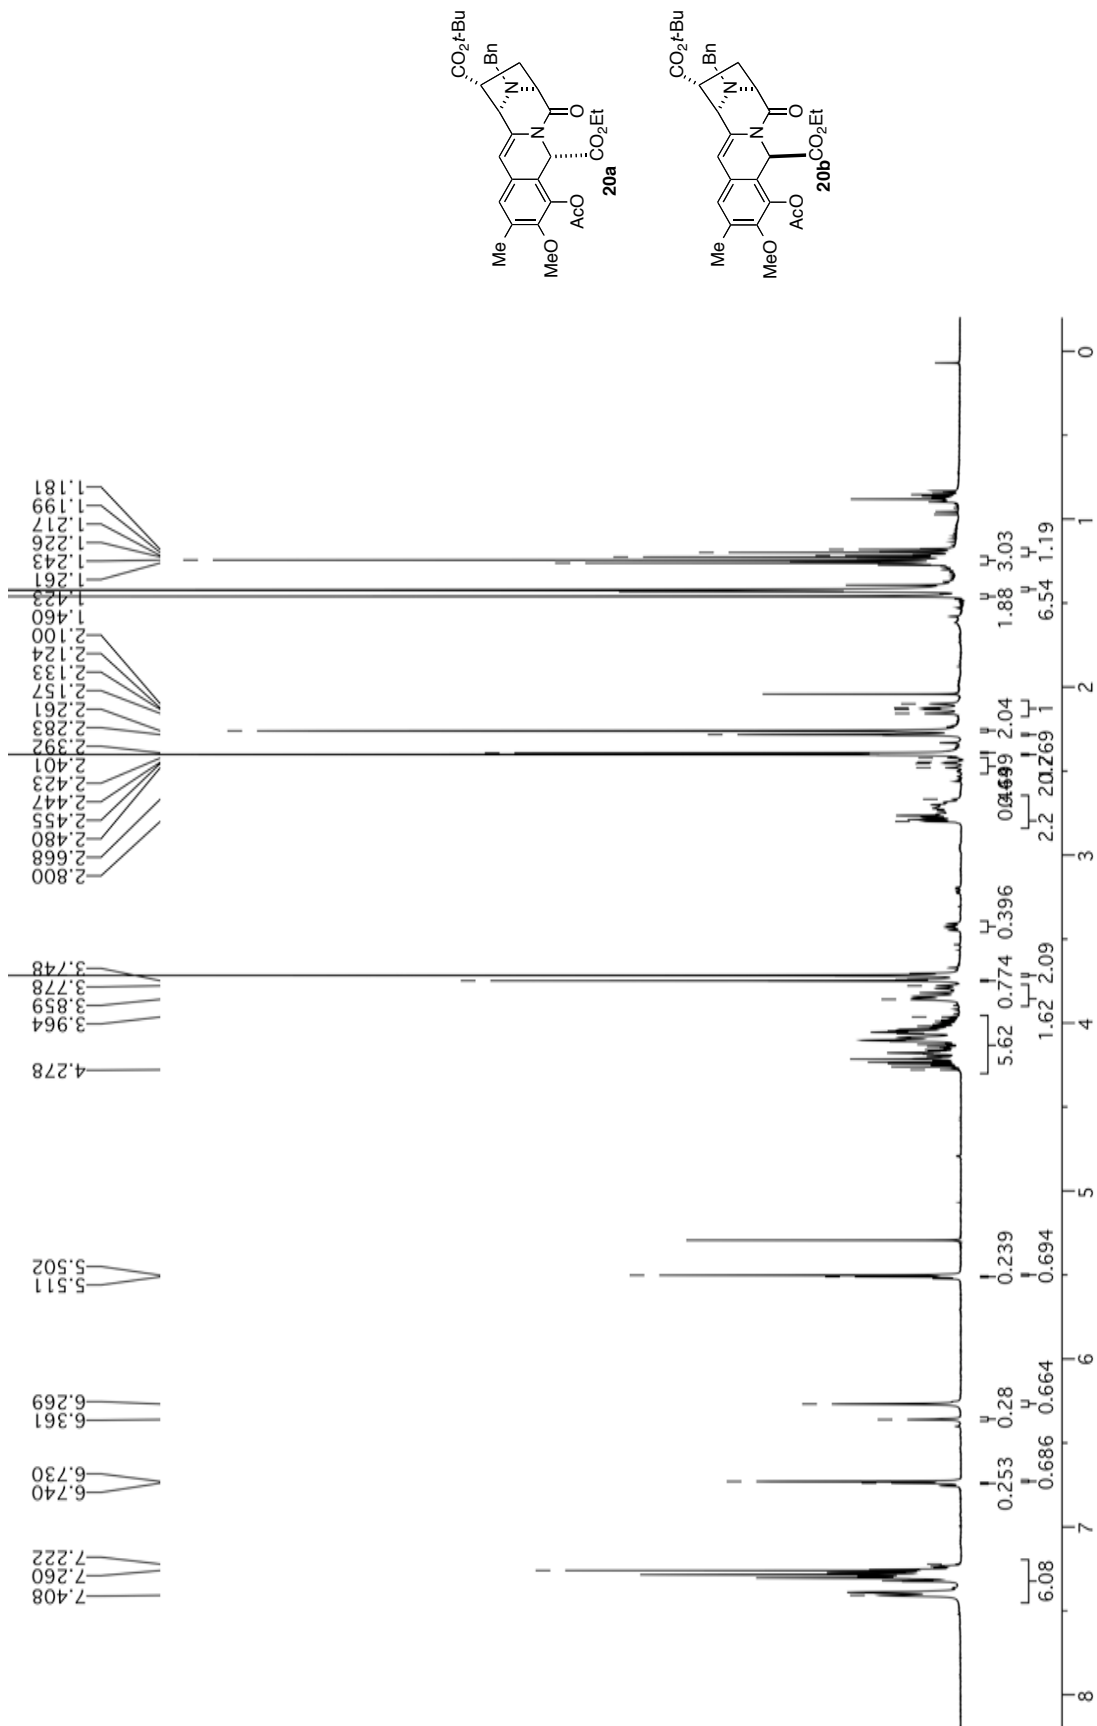

**<sup>1</sup>H-NMR spectrum of a 2.4:1 mixture of compounds 20a and 20b (400 MHz, CDCl<sub>3</sub>)**

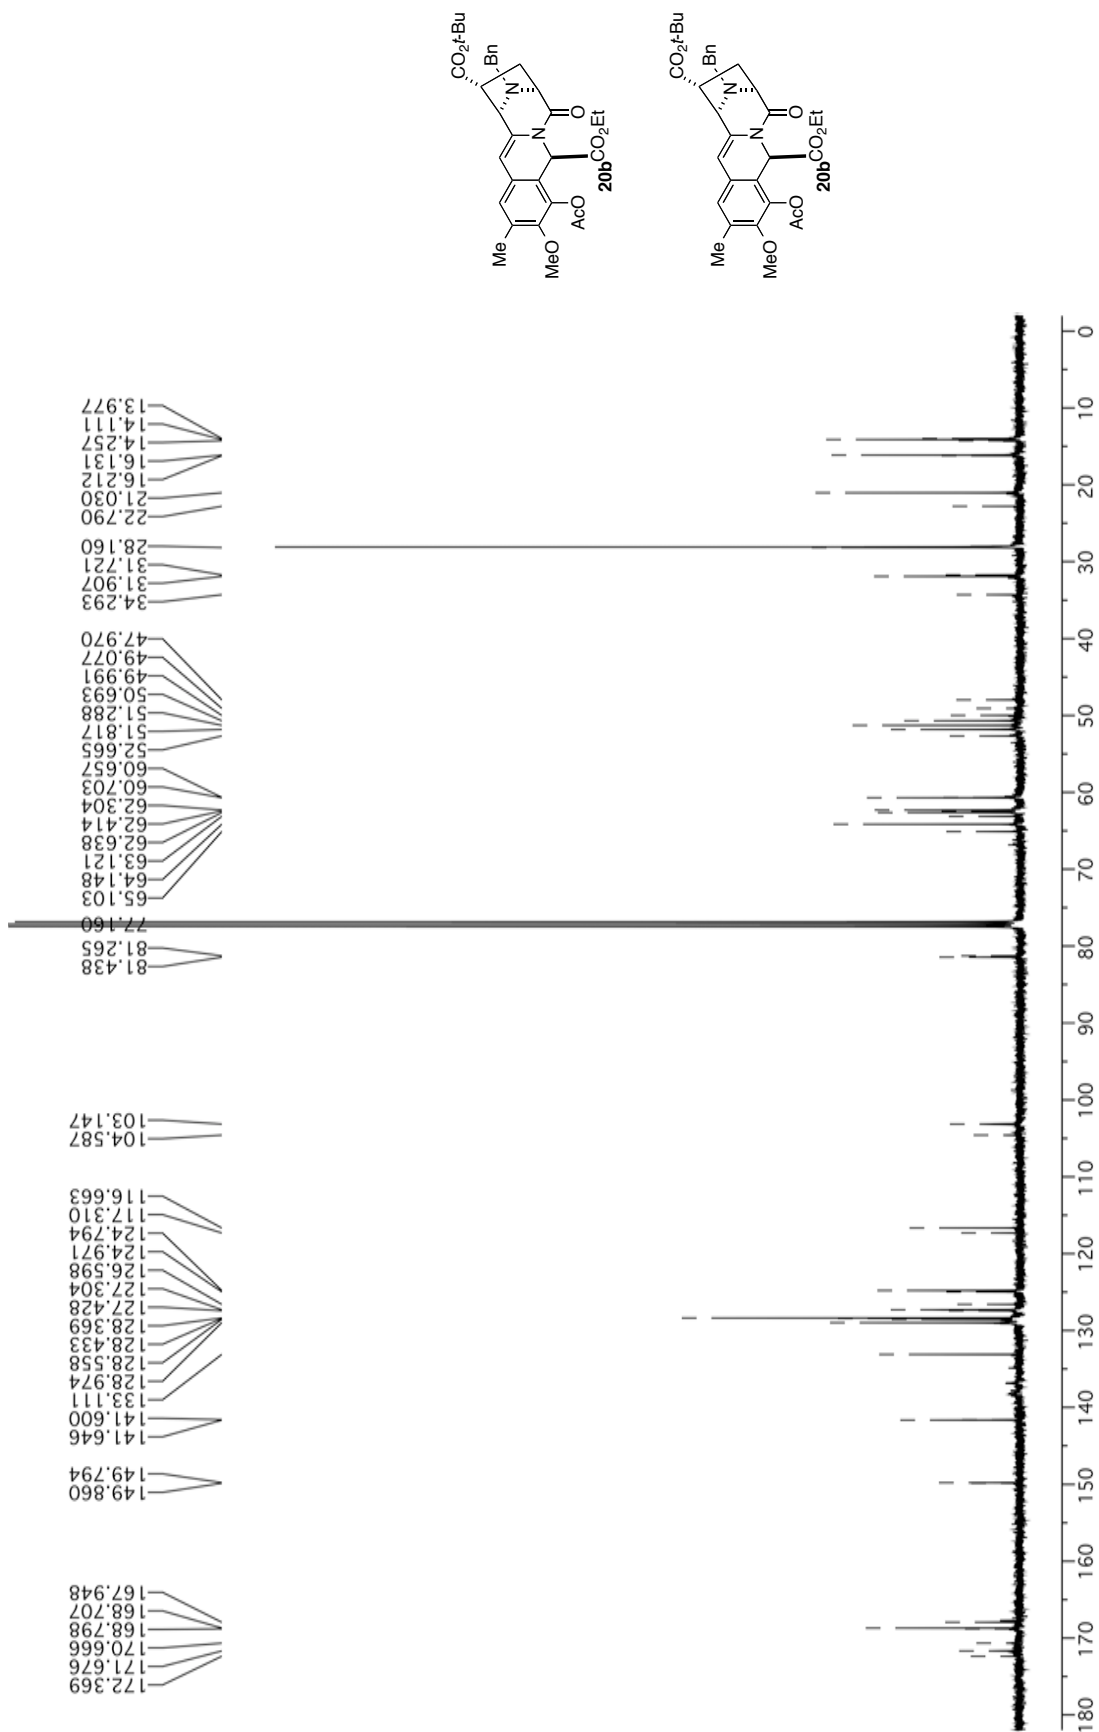

<sup>13</sup>C-NMR spectrum of a 2.4:1 mixture of compounds 20a and 20b (101 MHz, CDCl<sub>3</sub>)

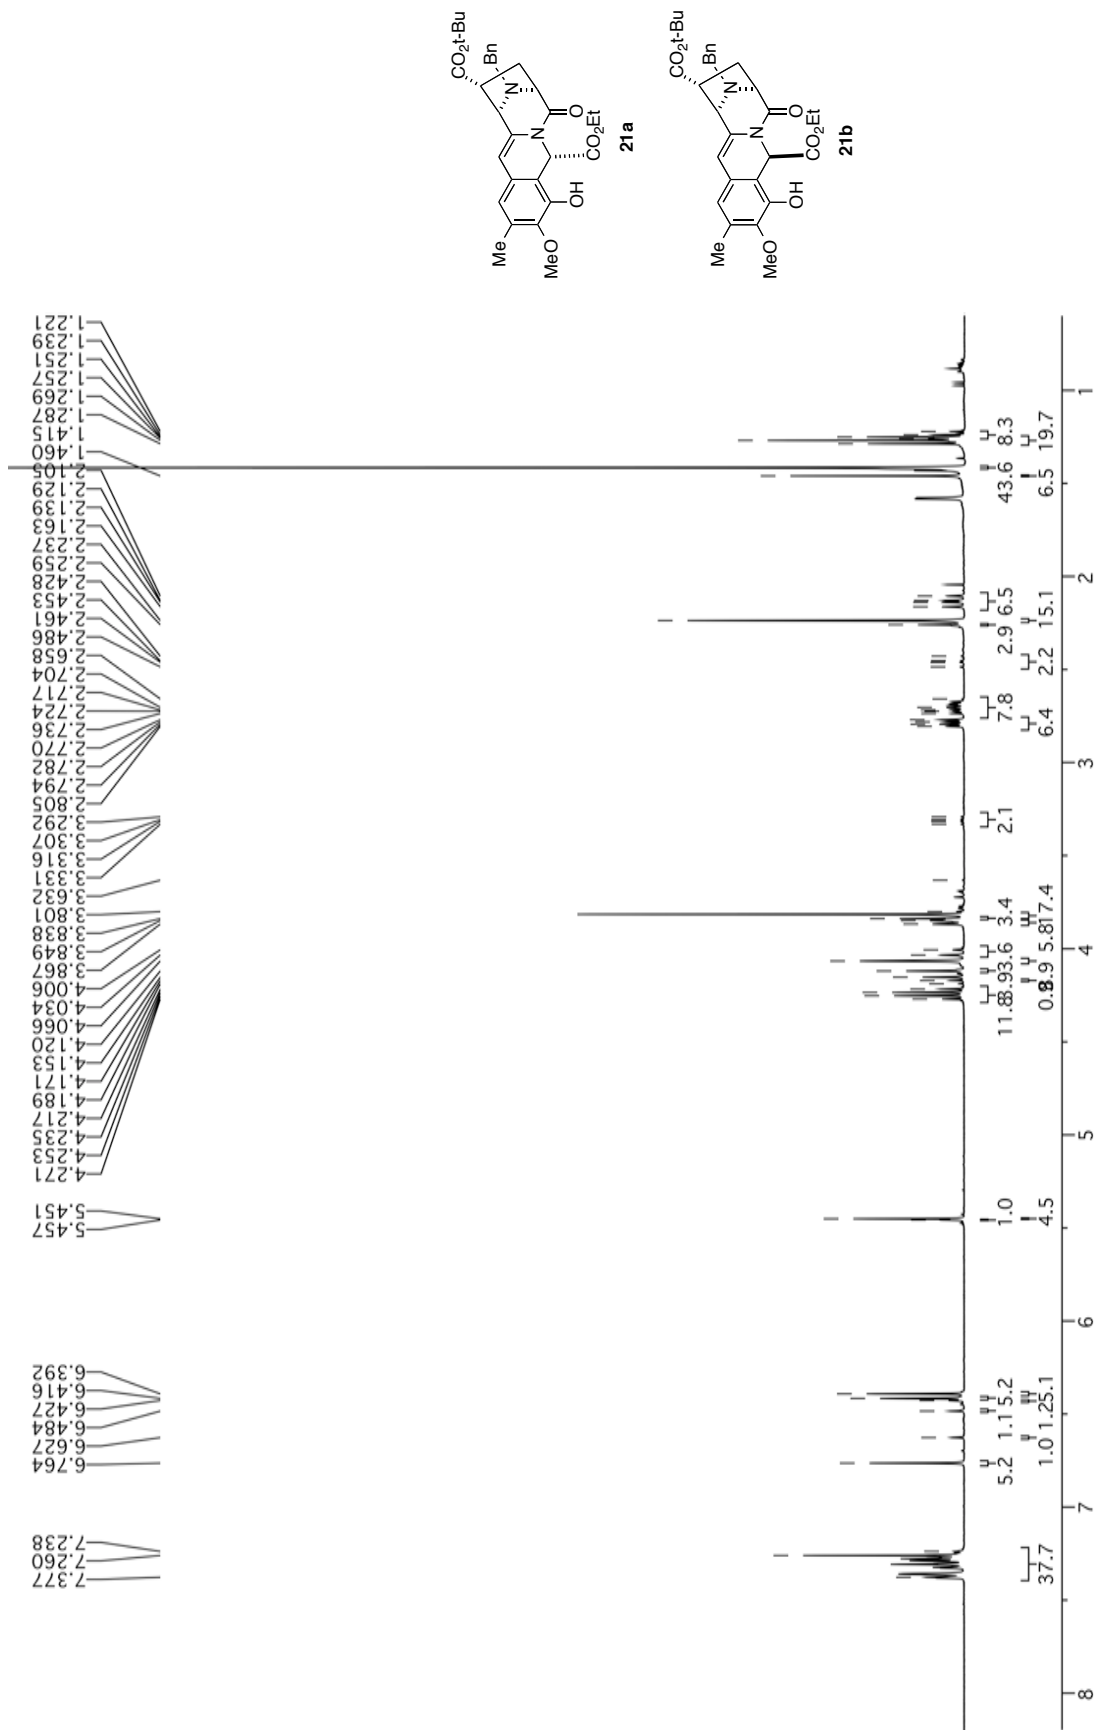

**<sup>1</sup>H-NMR spectrum of a 5:1 mixture of compounds 21a and 21b (400 MHz, CDCl<sub>3</sub>)**

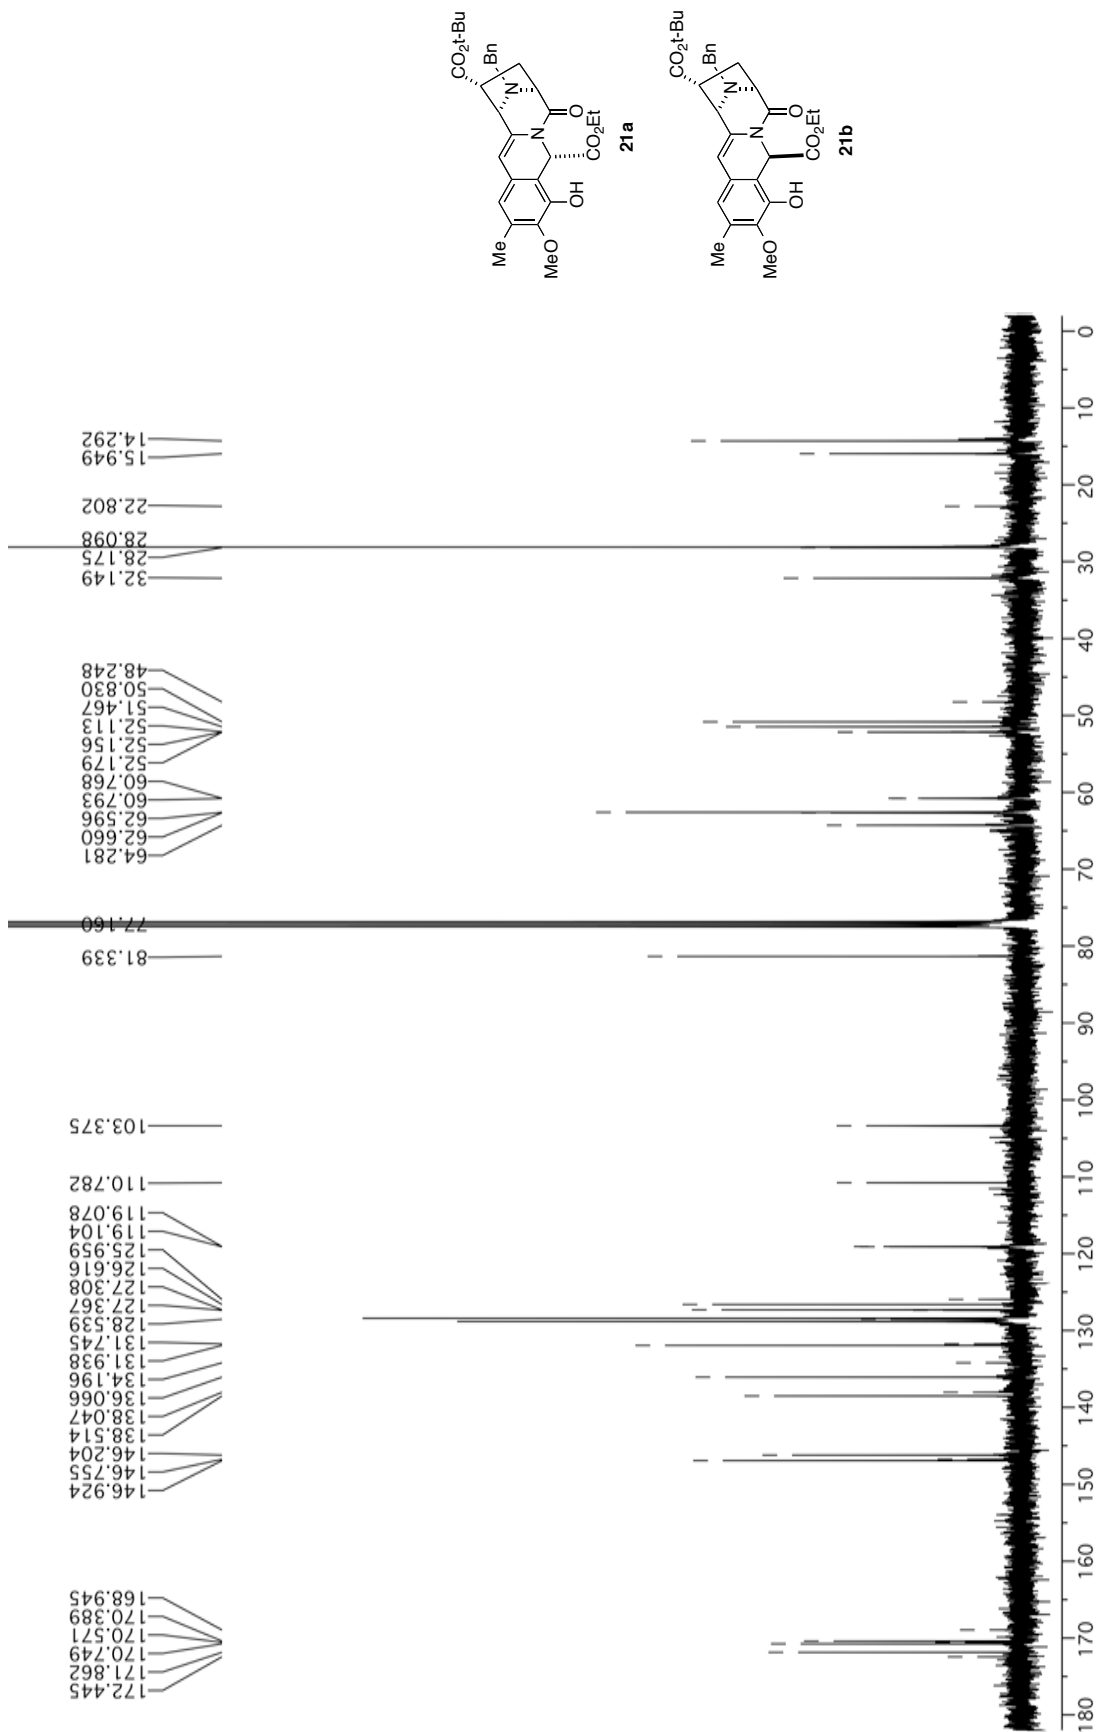

<sup>13</sup>C-NMR spectrum of a 5:1 mixture of compounds 21a and 21b (101 MHz, CDCl<sub>3</sub>)

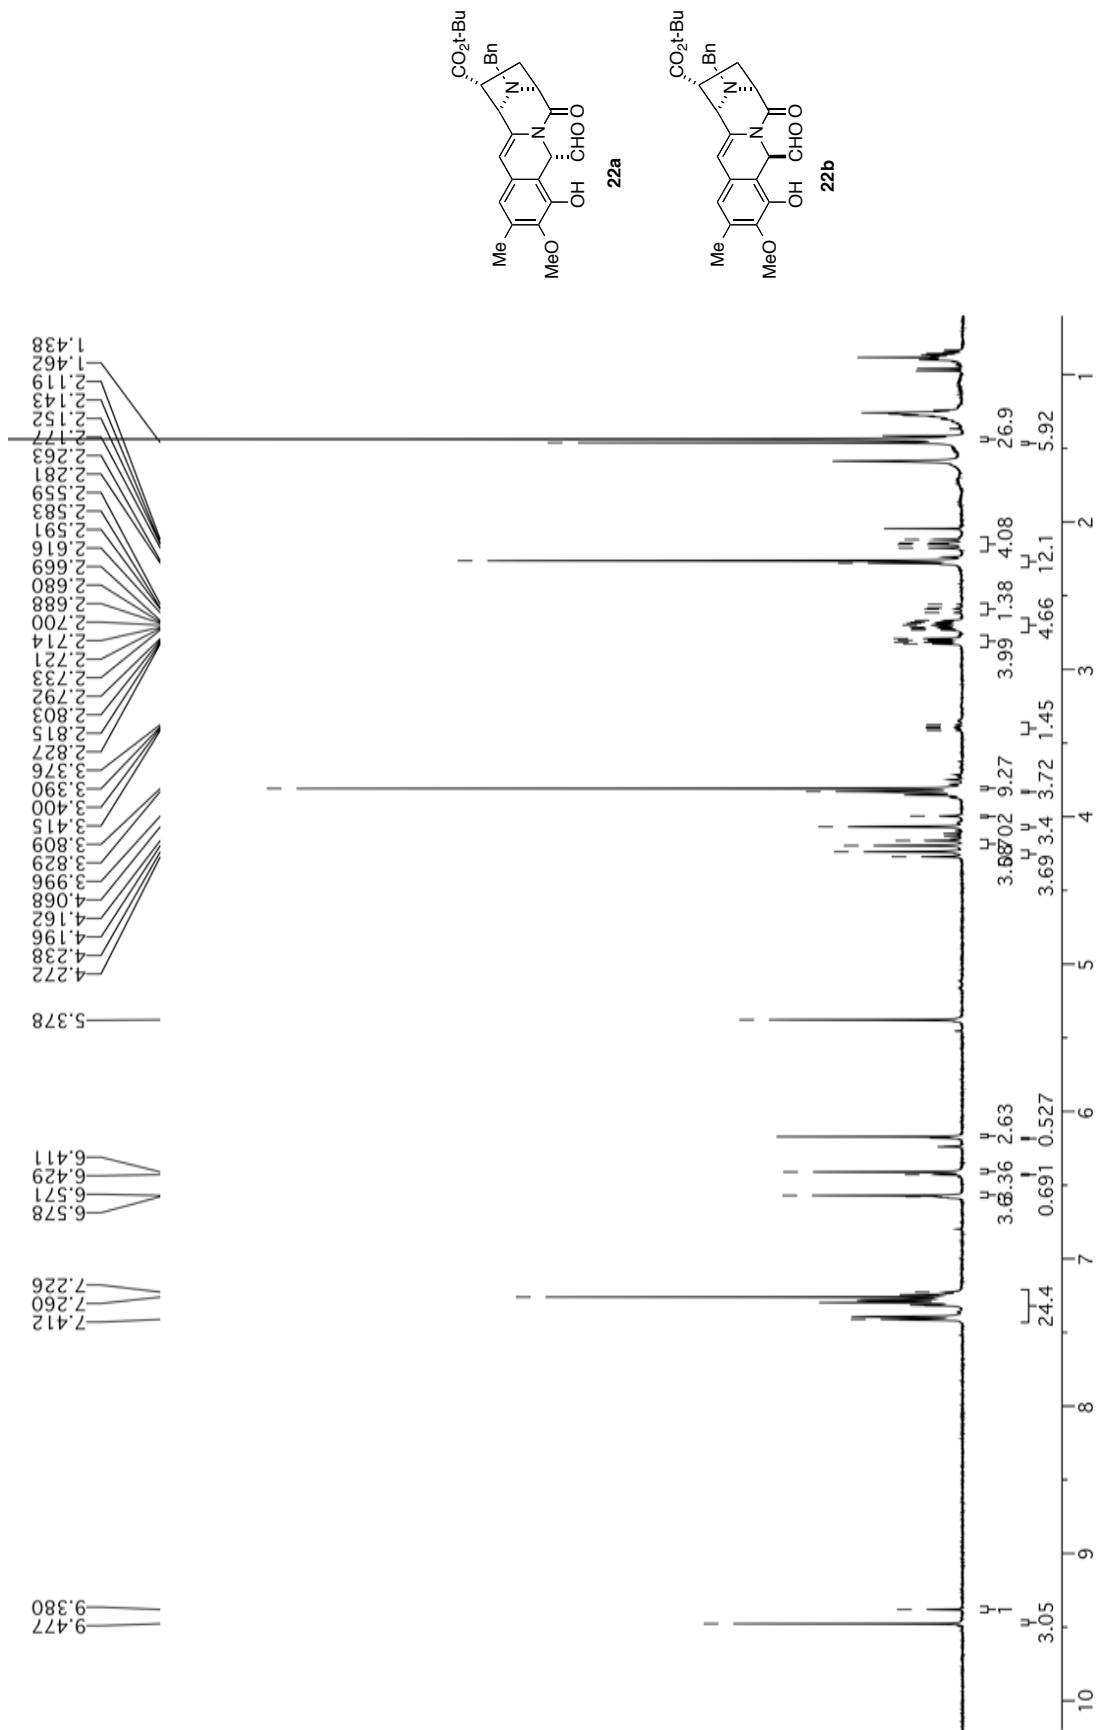

<sup>1</sup>H-NMR spectrum of a 3:1 mixture of compounds 22a and 22b (400 MHz, CDCl<sub>3</sub>)

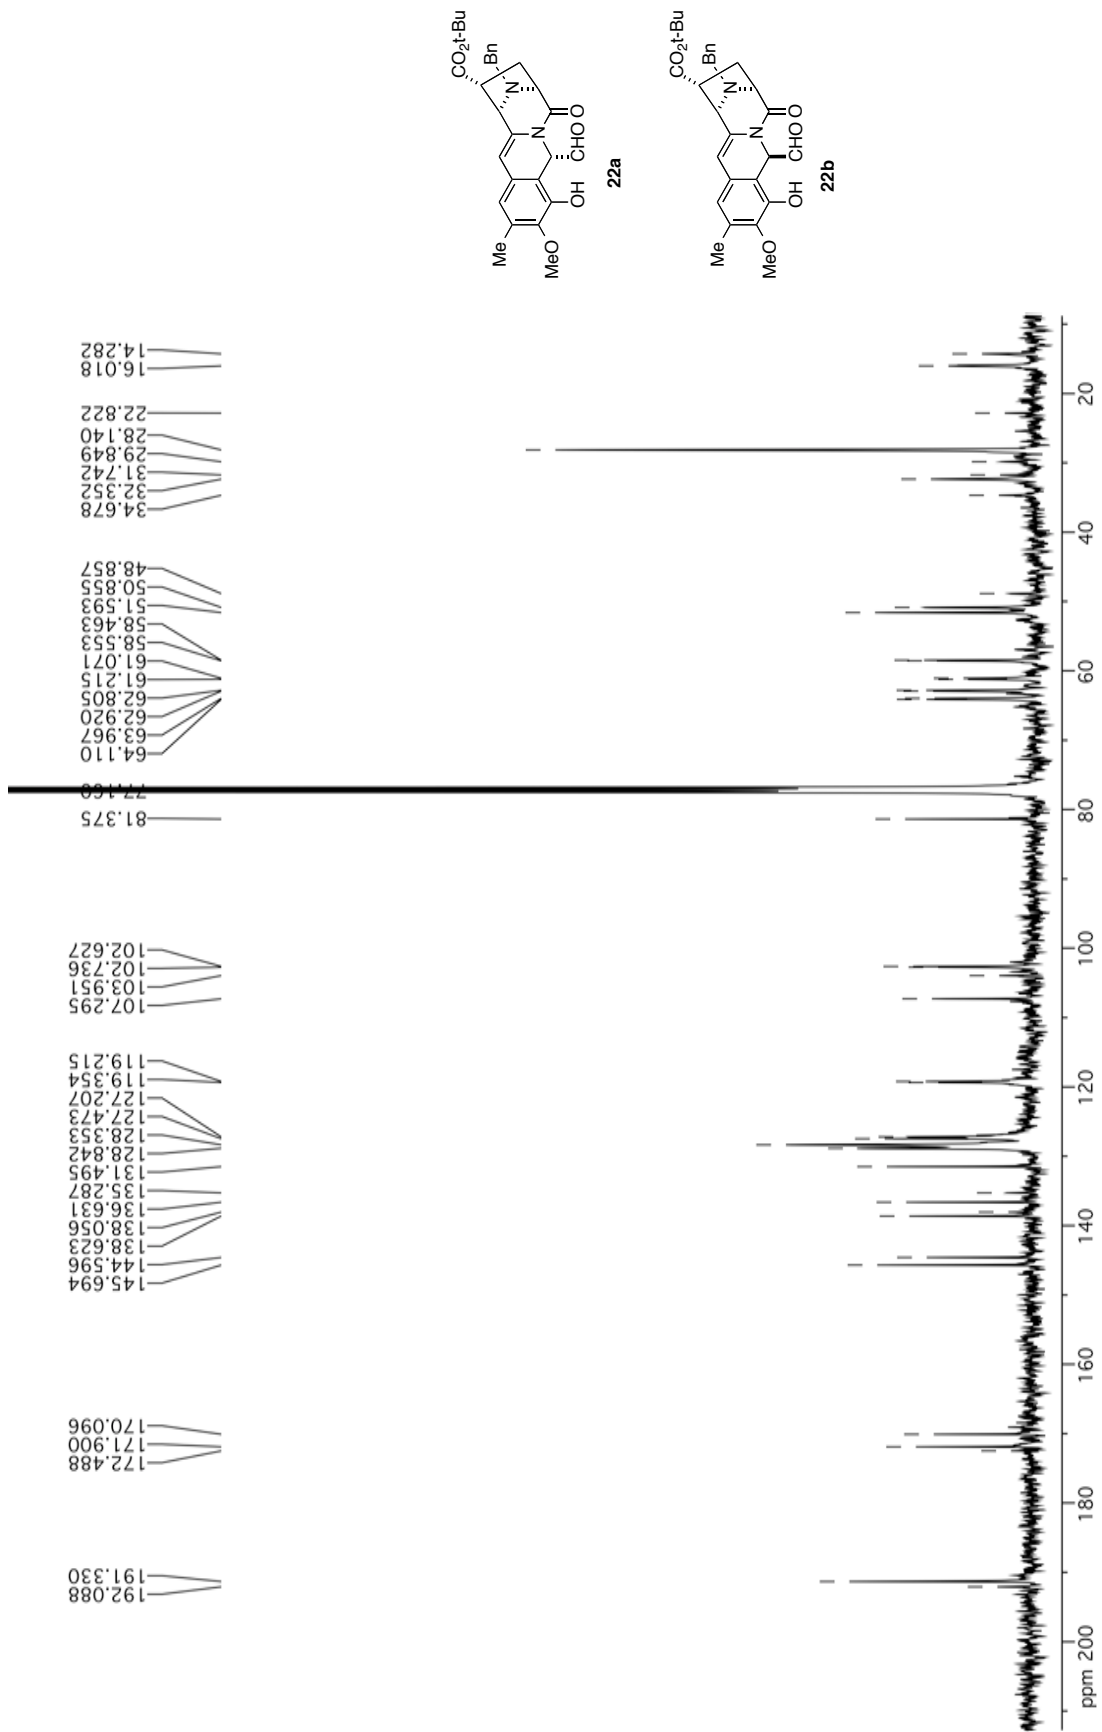

<sup>13</sup>C-NMR spectrum of a 3:1 mixture of compounds 22a and 22b (101 MHz, CDCl<sub>3</sub>)

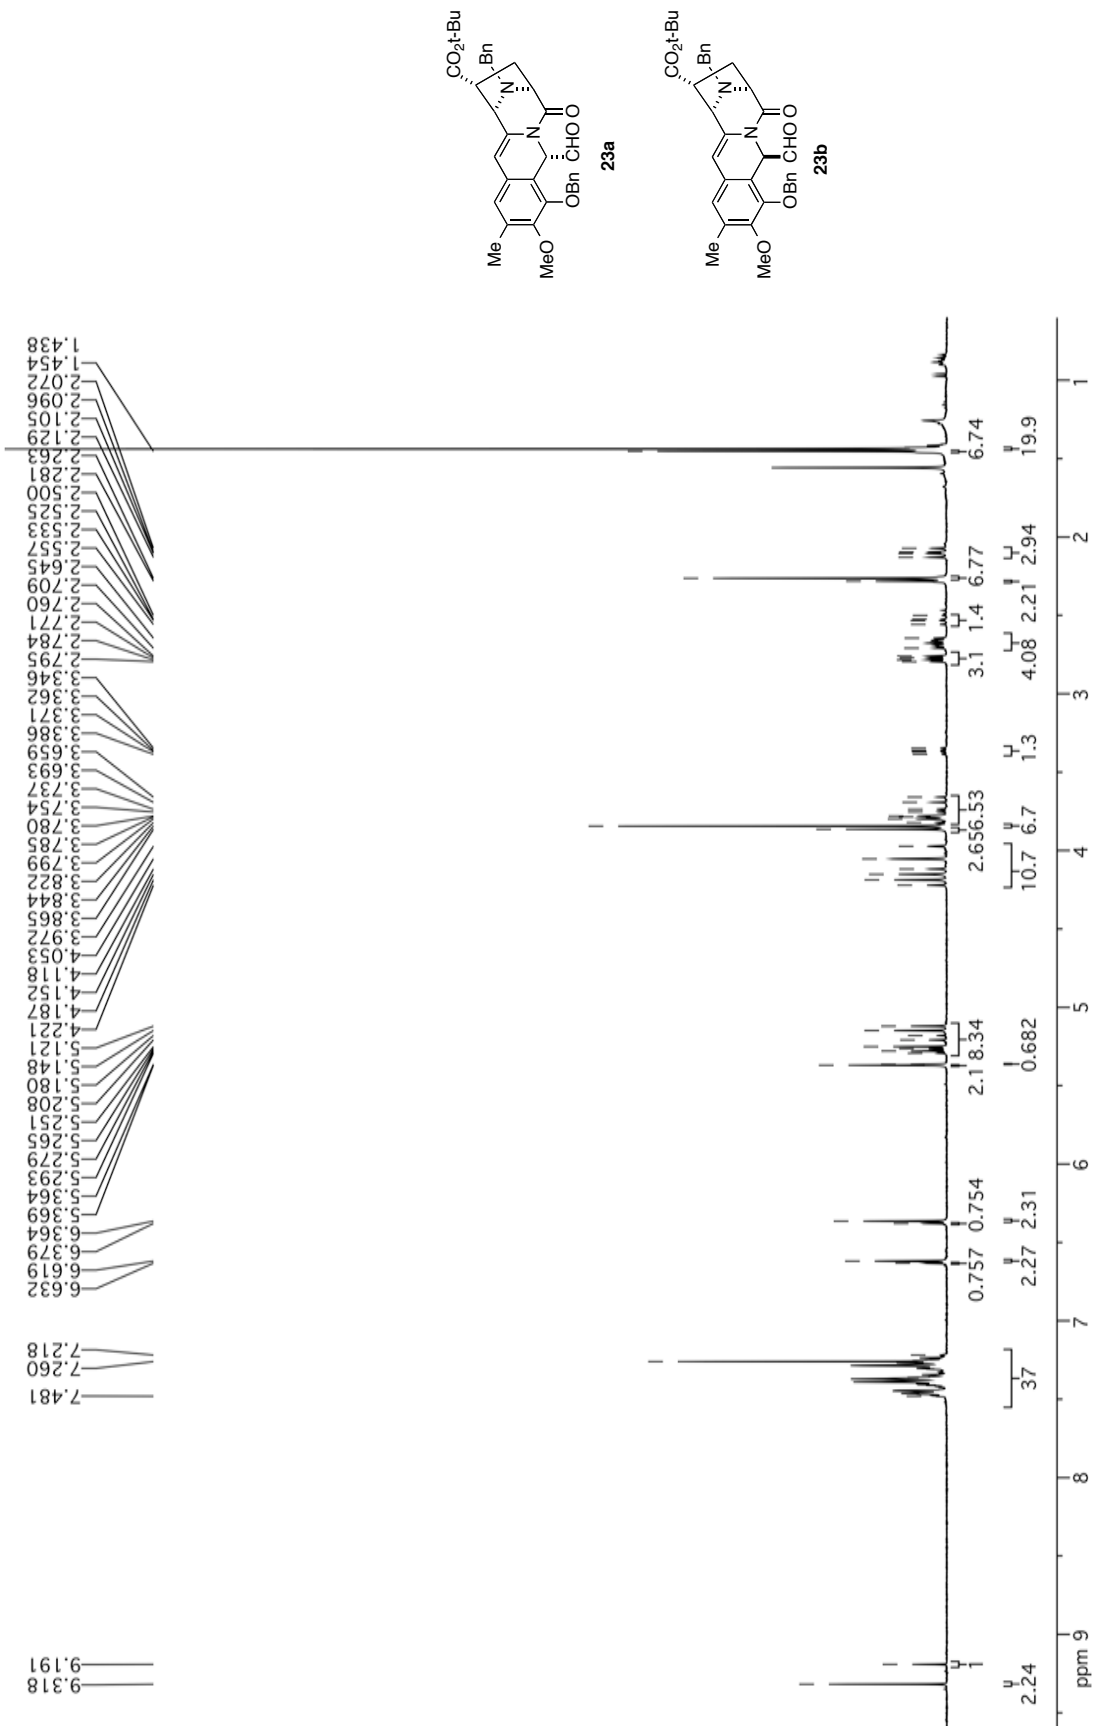

**<sup>1</sup>H-NMR spectrum of a 2.2:1 mixture of compounds 23a and 23b (400 MHz, CDCl<sub>3</sub>)**



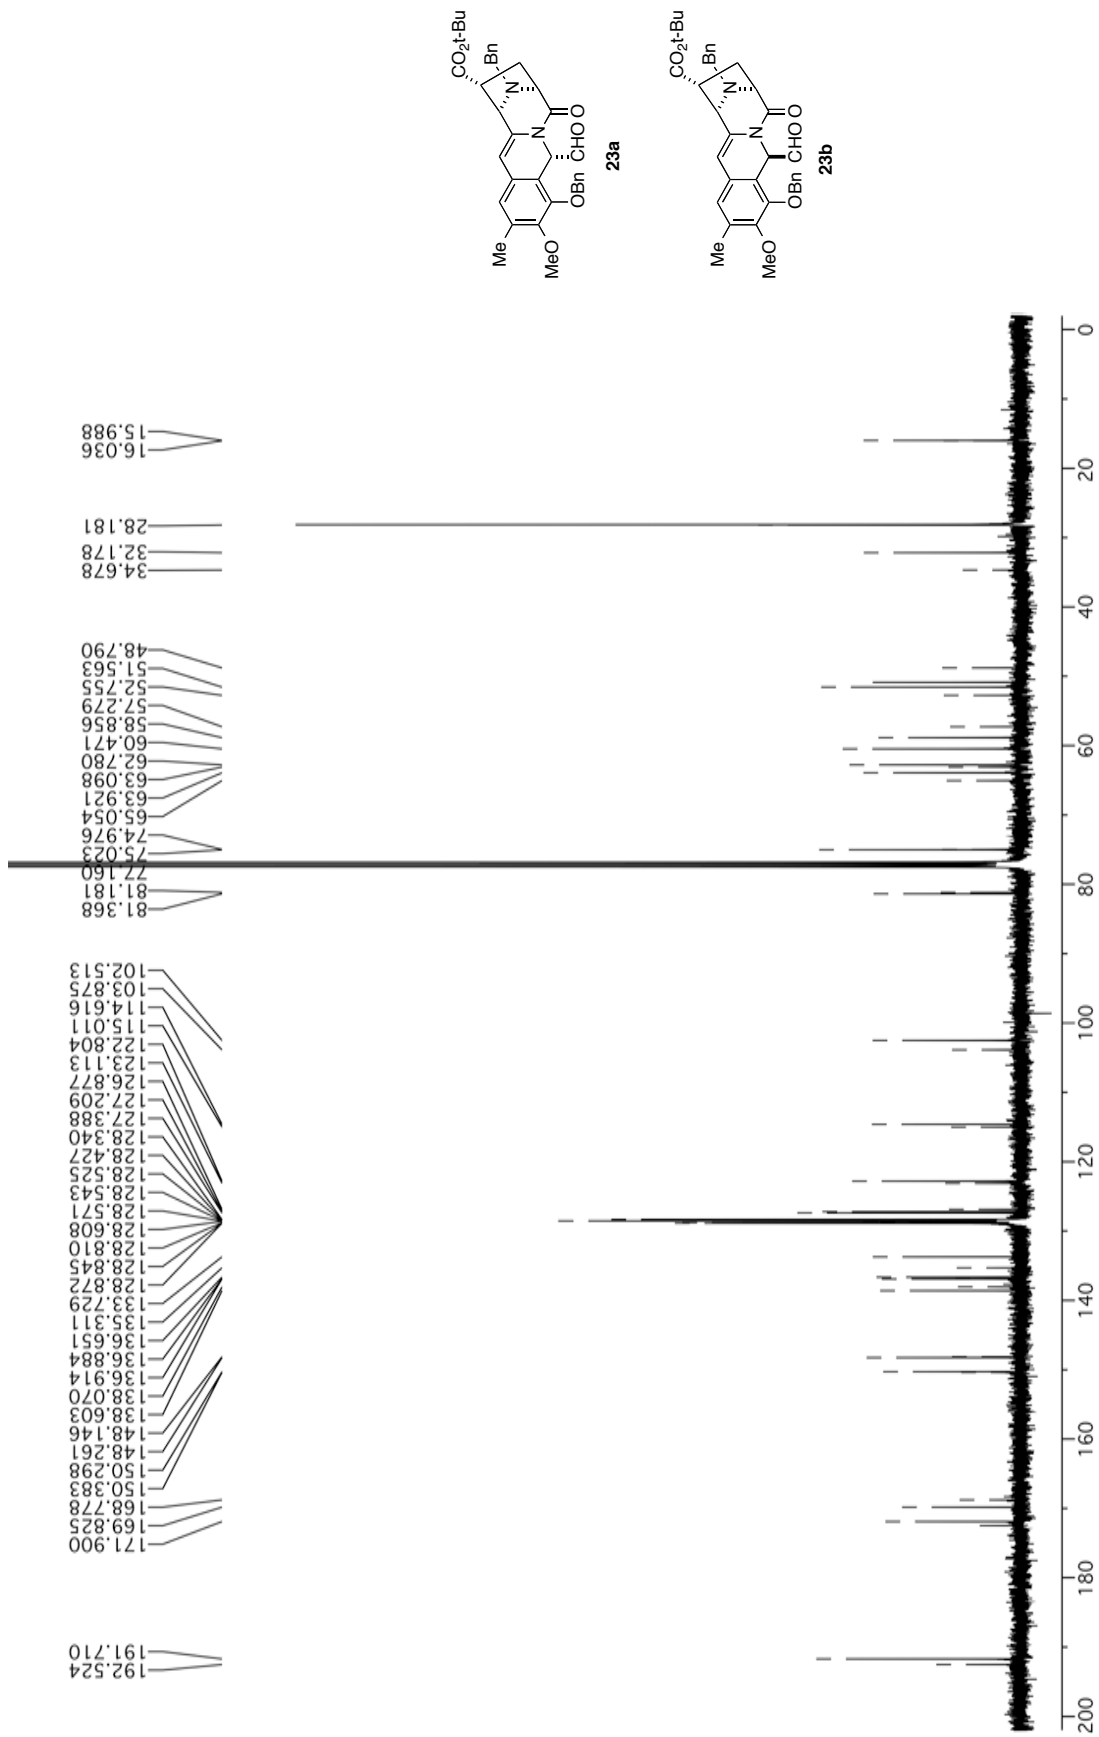

<sup>13</sup>C-NMR spectrum of a 2.2:1 mixture of compounds 23a and 23b (101 MHz, CDCl<sub>3</sub>)

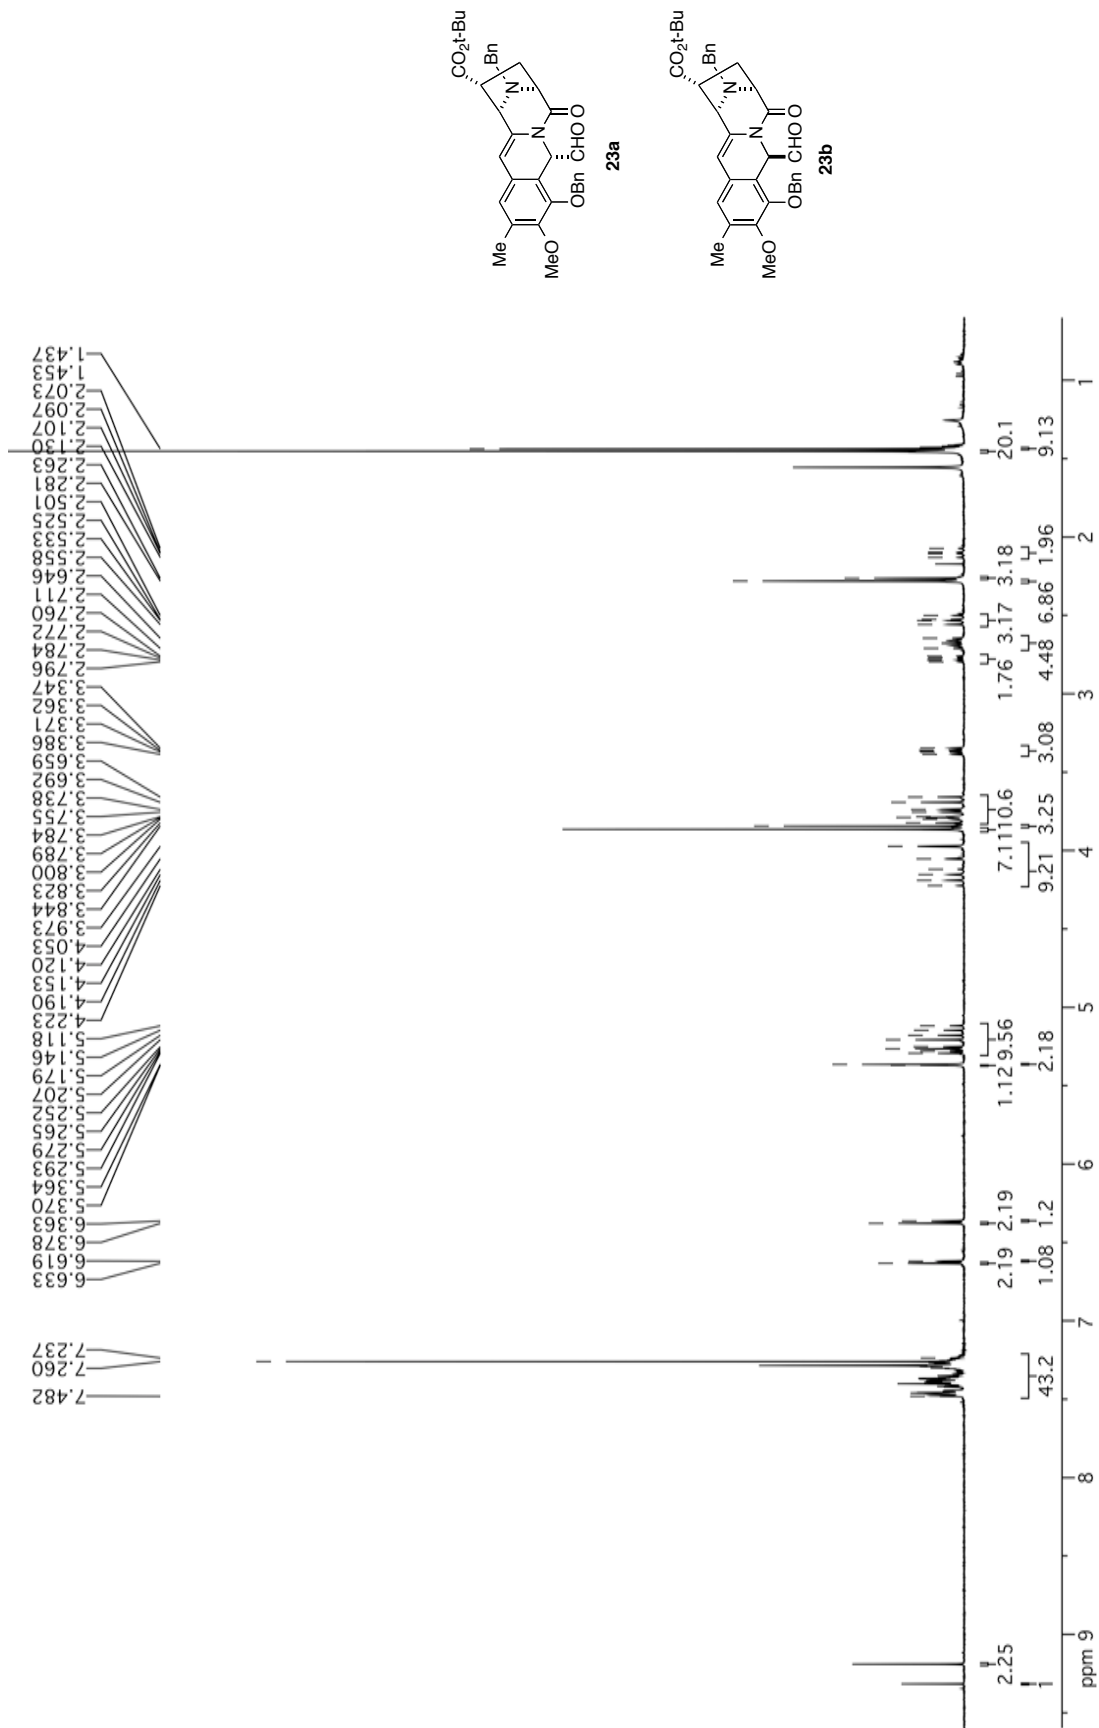

**<sup>1</sup>H-NMR spectrum of a 1:2:2 mixture of compounds 23a and 23b (400 MHz, CDCl<sub>3</sub>)**

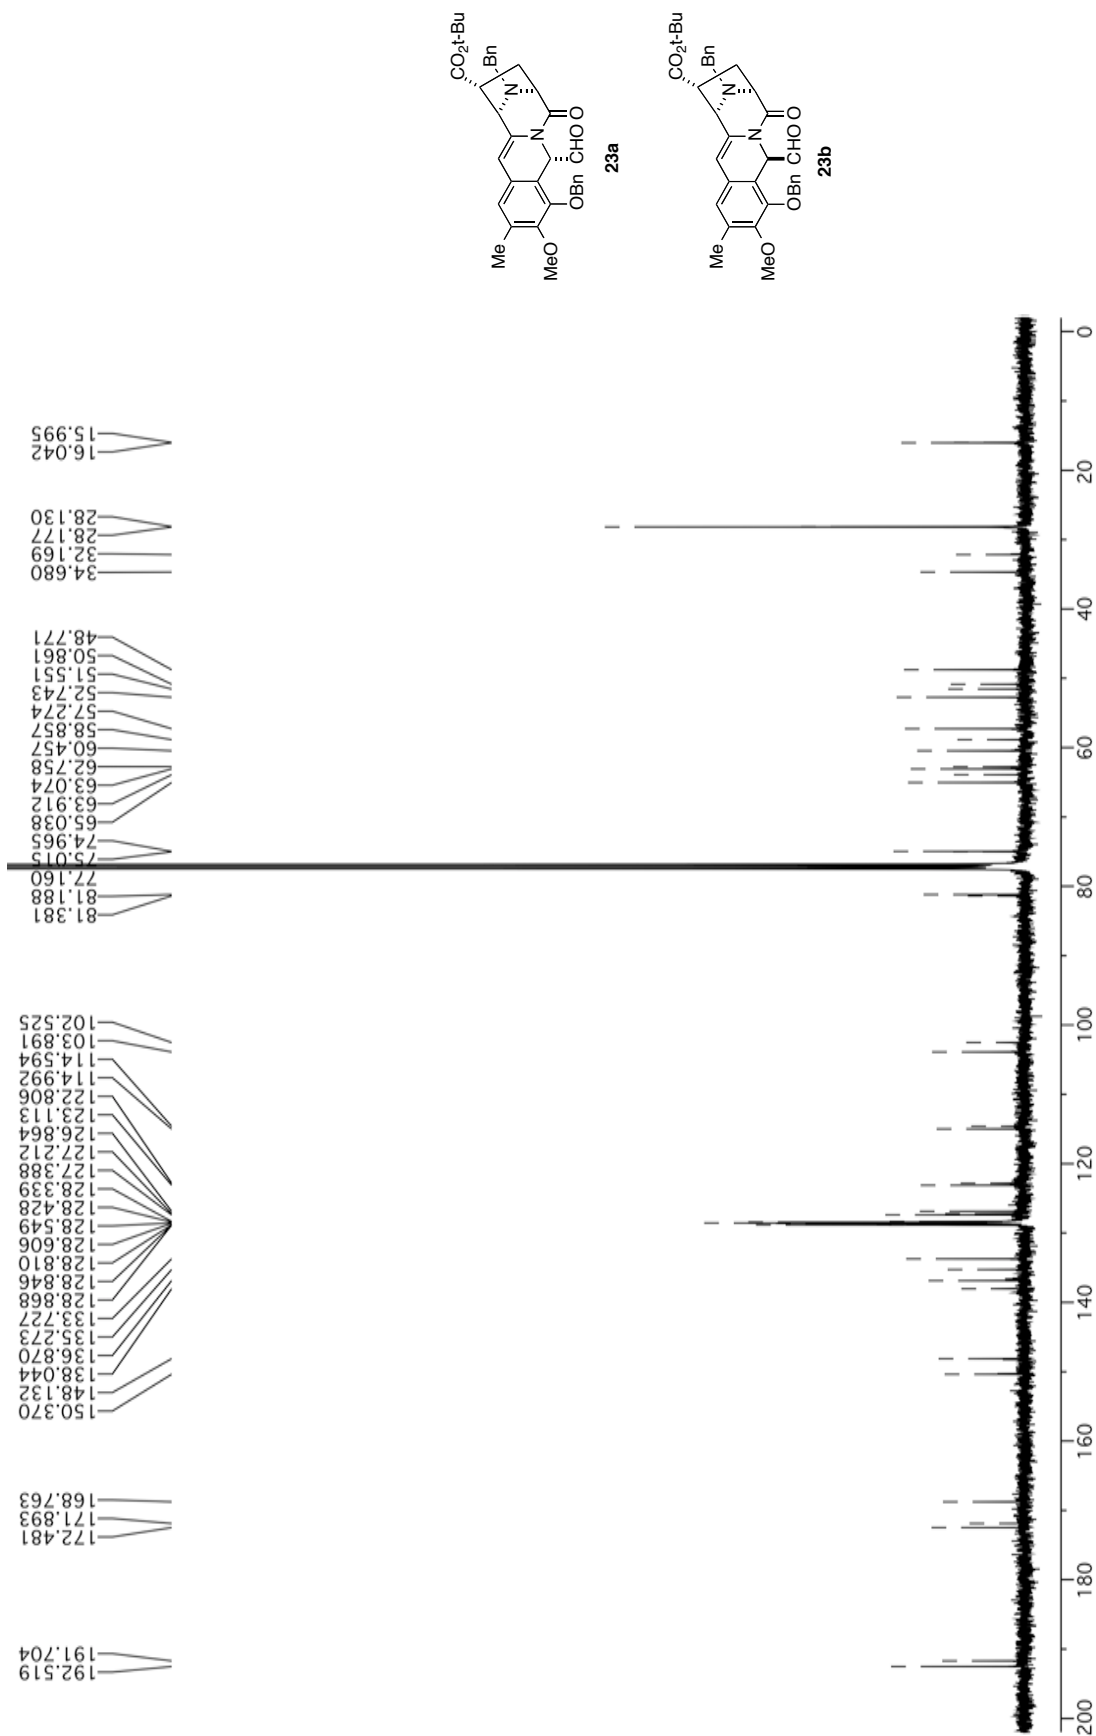

<sup>13</sup>C-NMR spectrum of a 1:2:2 mixture of compounds 23a and 23b (101 MHz, CDCl<sub>3</sub>)

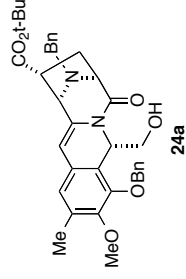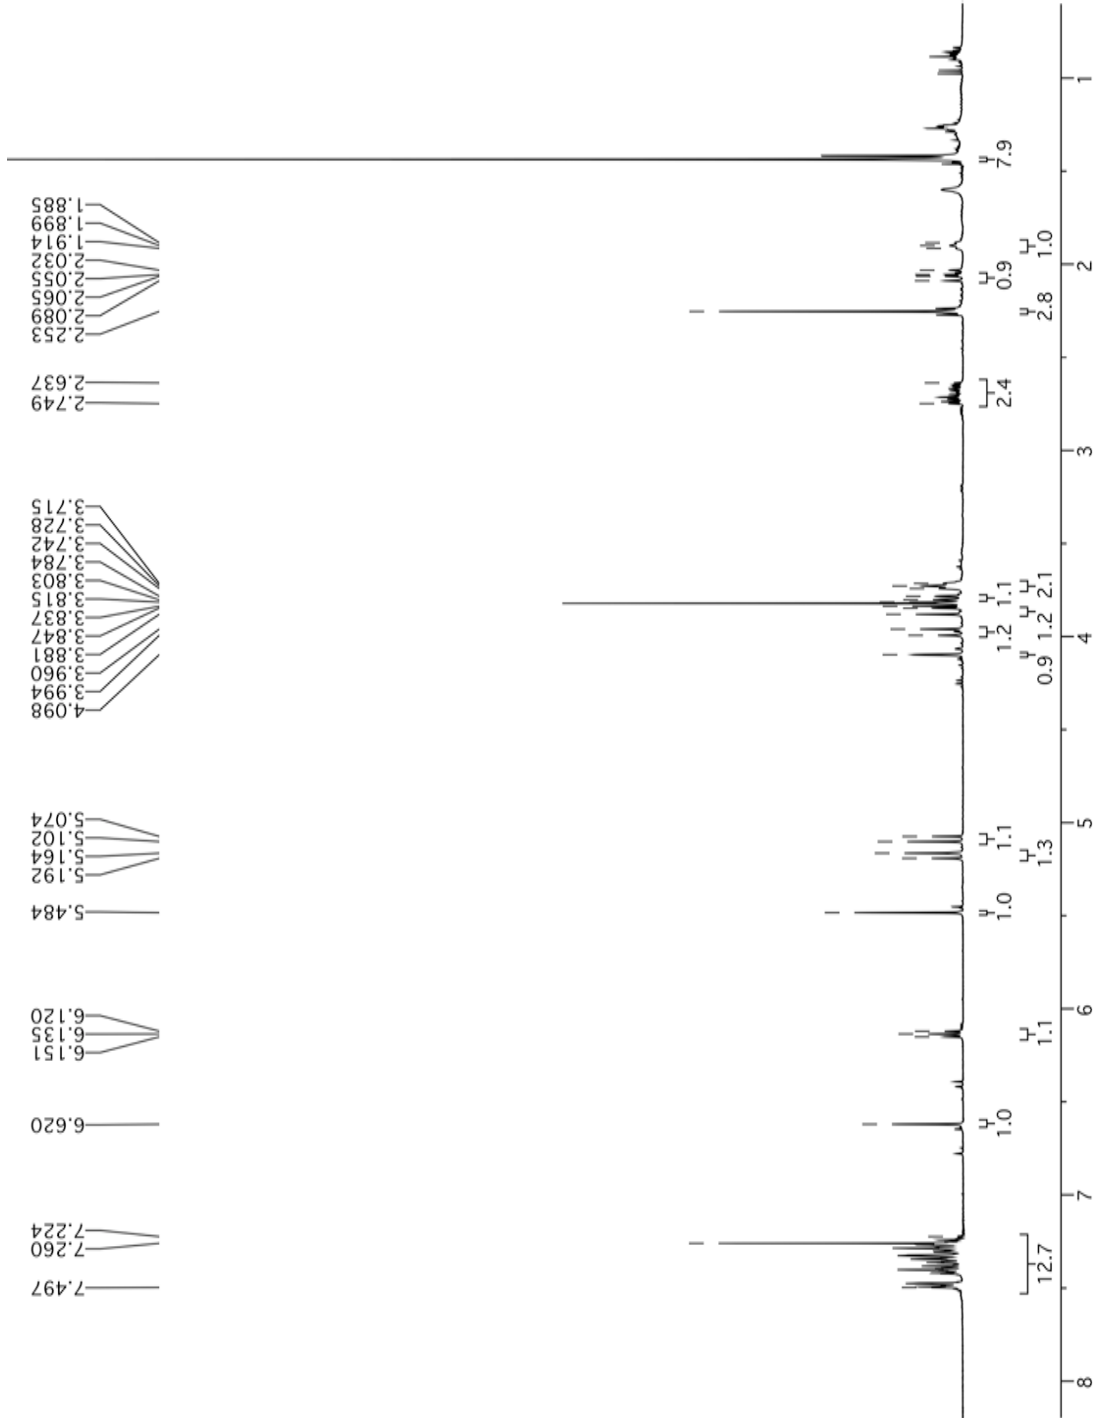

<sup>1</sup>H-NMR spectrum of compound 24a (400 MHz, CDCl<sub>3</sub>)

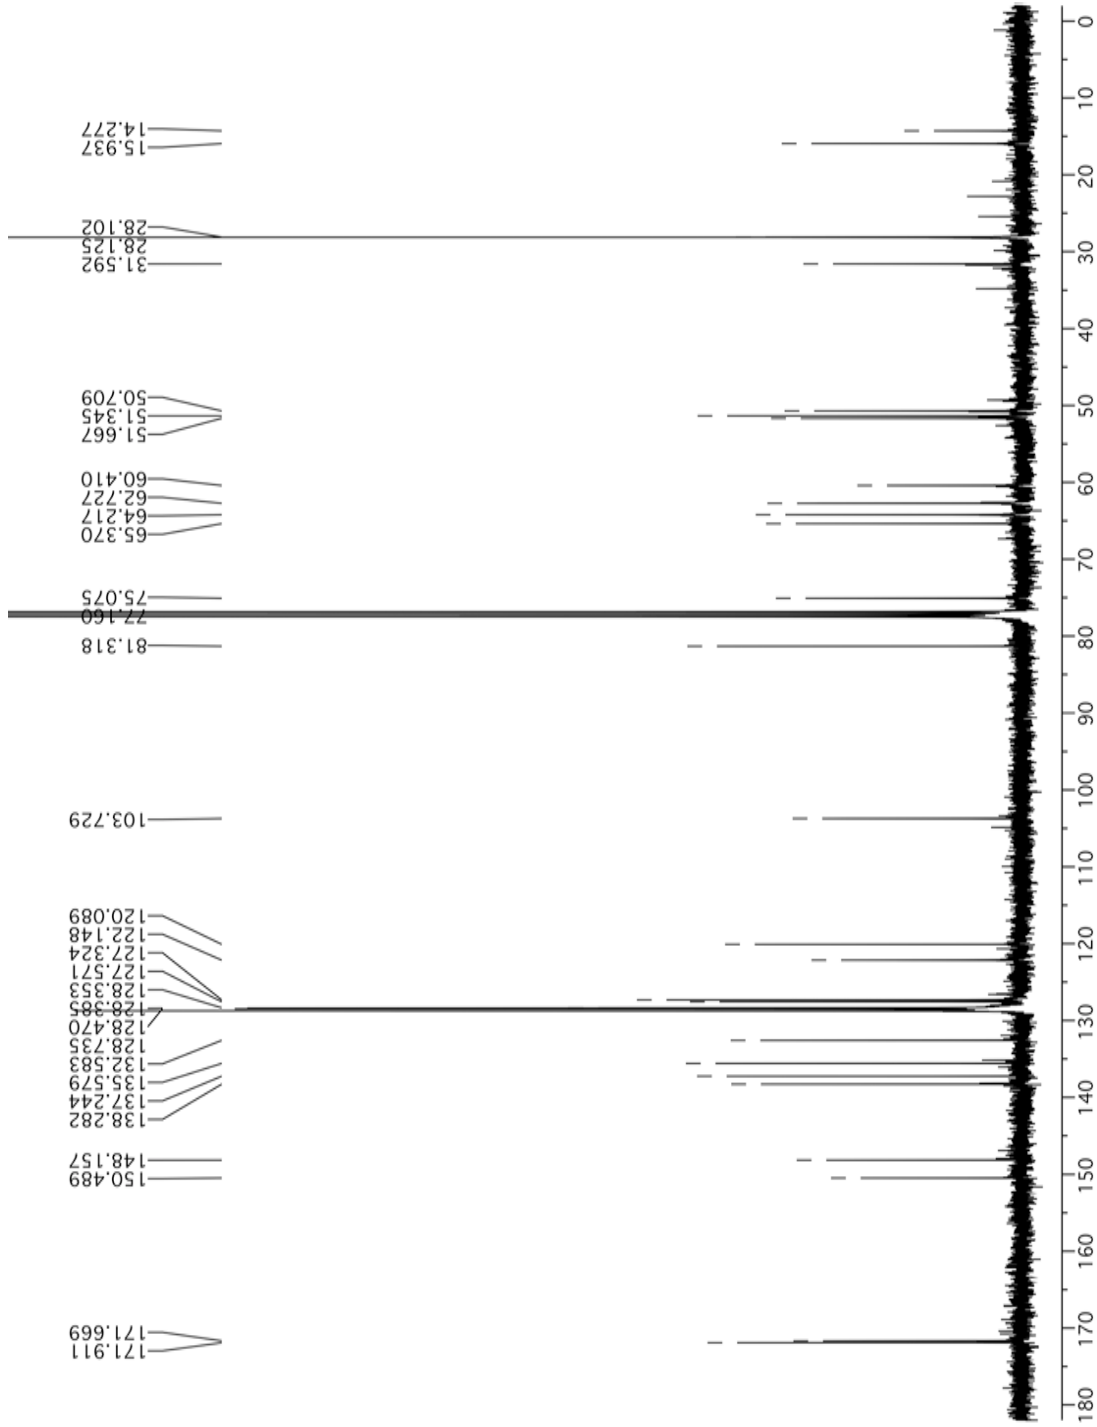

<sup>13</sup>C-NMR spectrum of compound 25a (101 MHz, CDCl<sub>3</sub>)

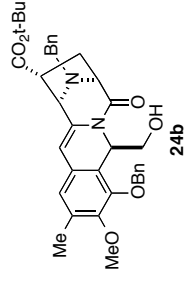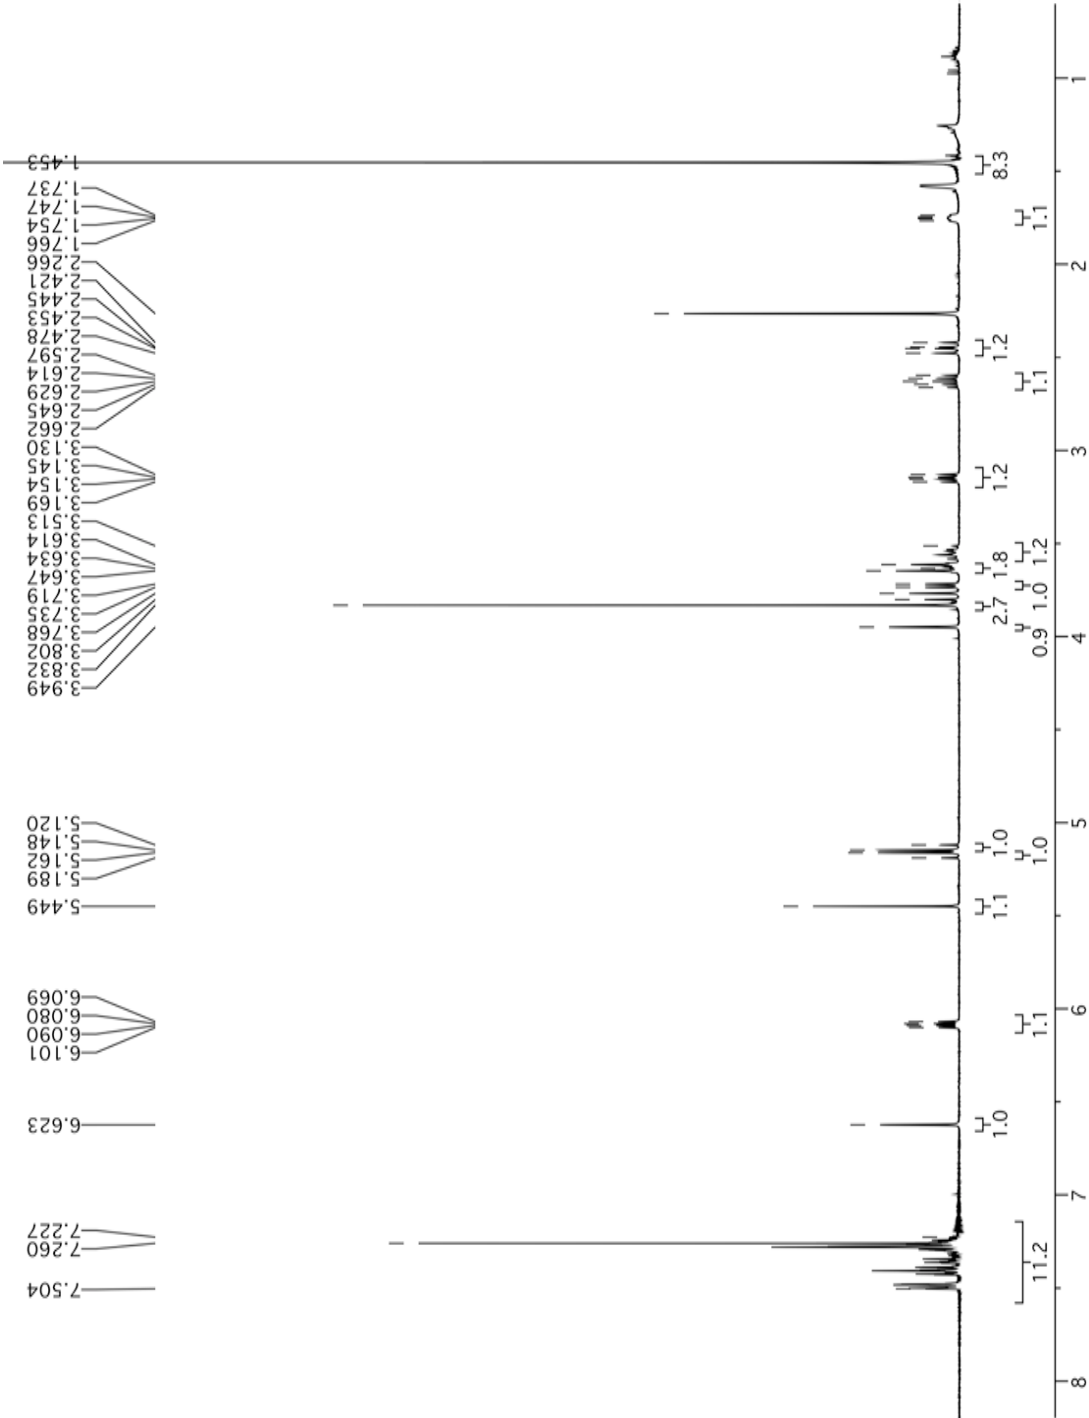

<sup>1</sup>H-NMR spectrum of compound 24b (400 MHz, CDCl<sub>3</sub>)

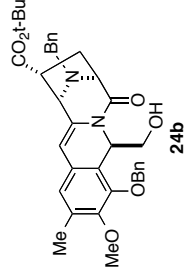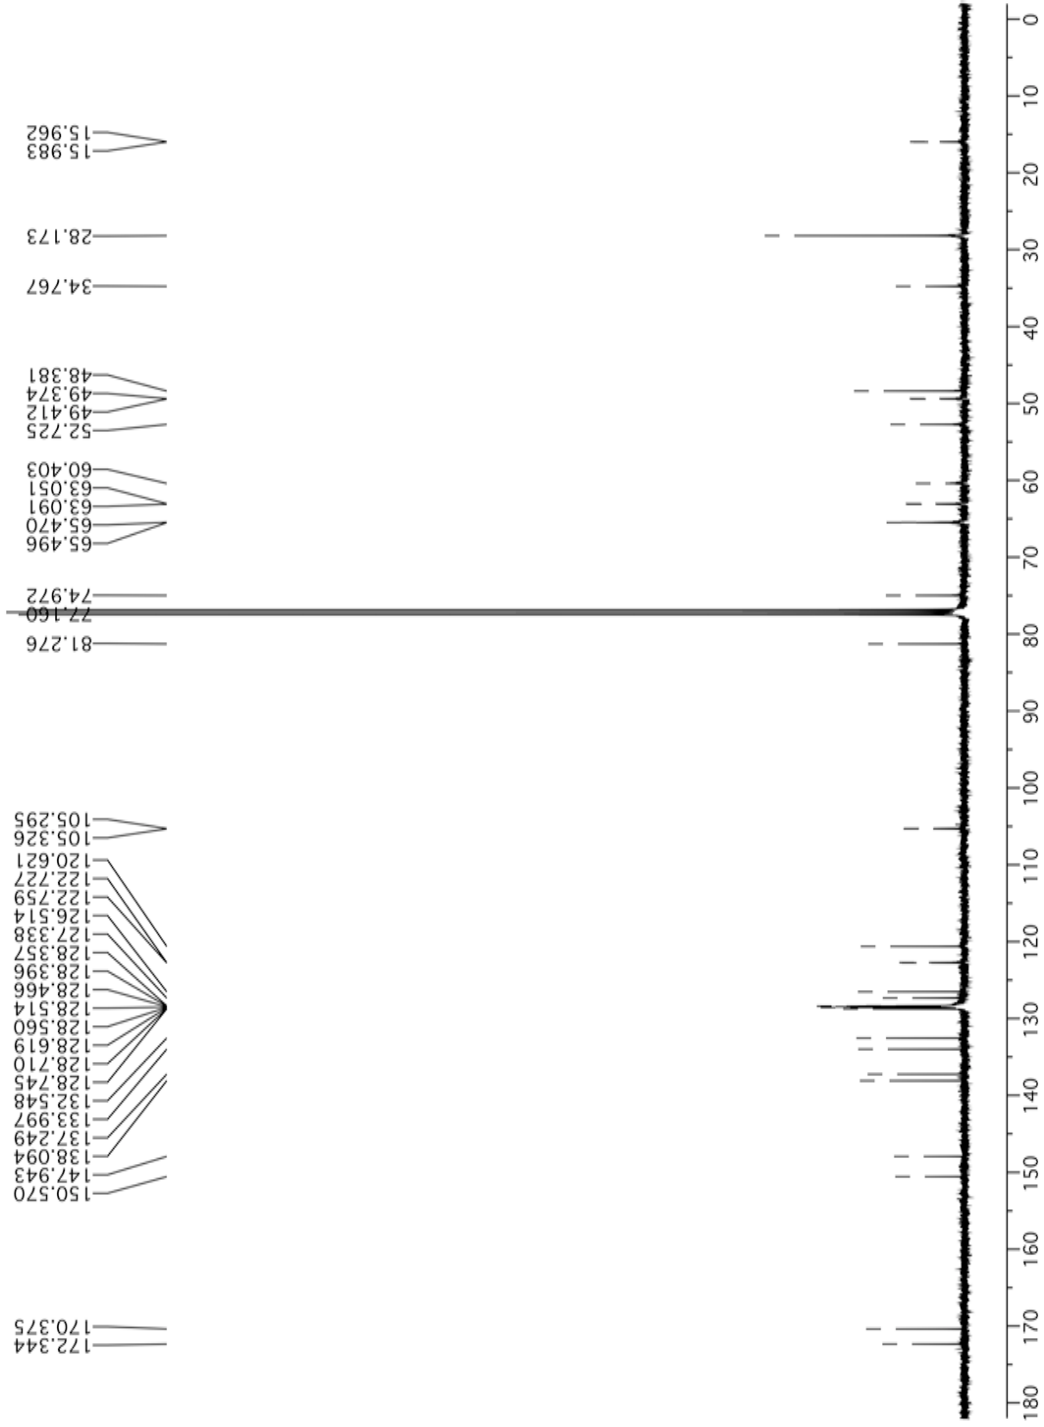

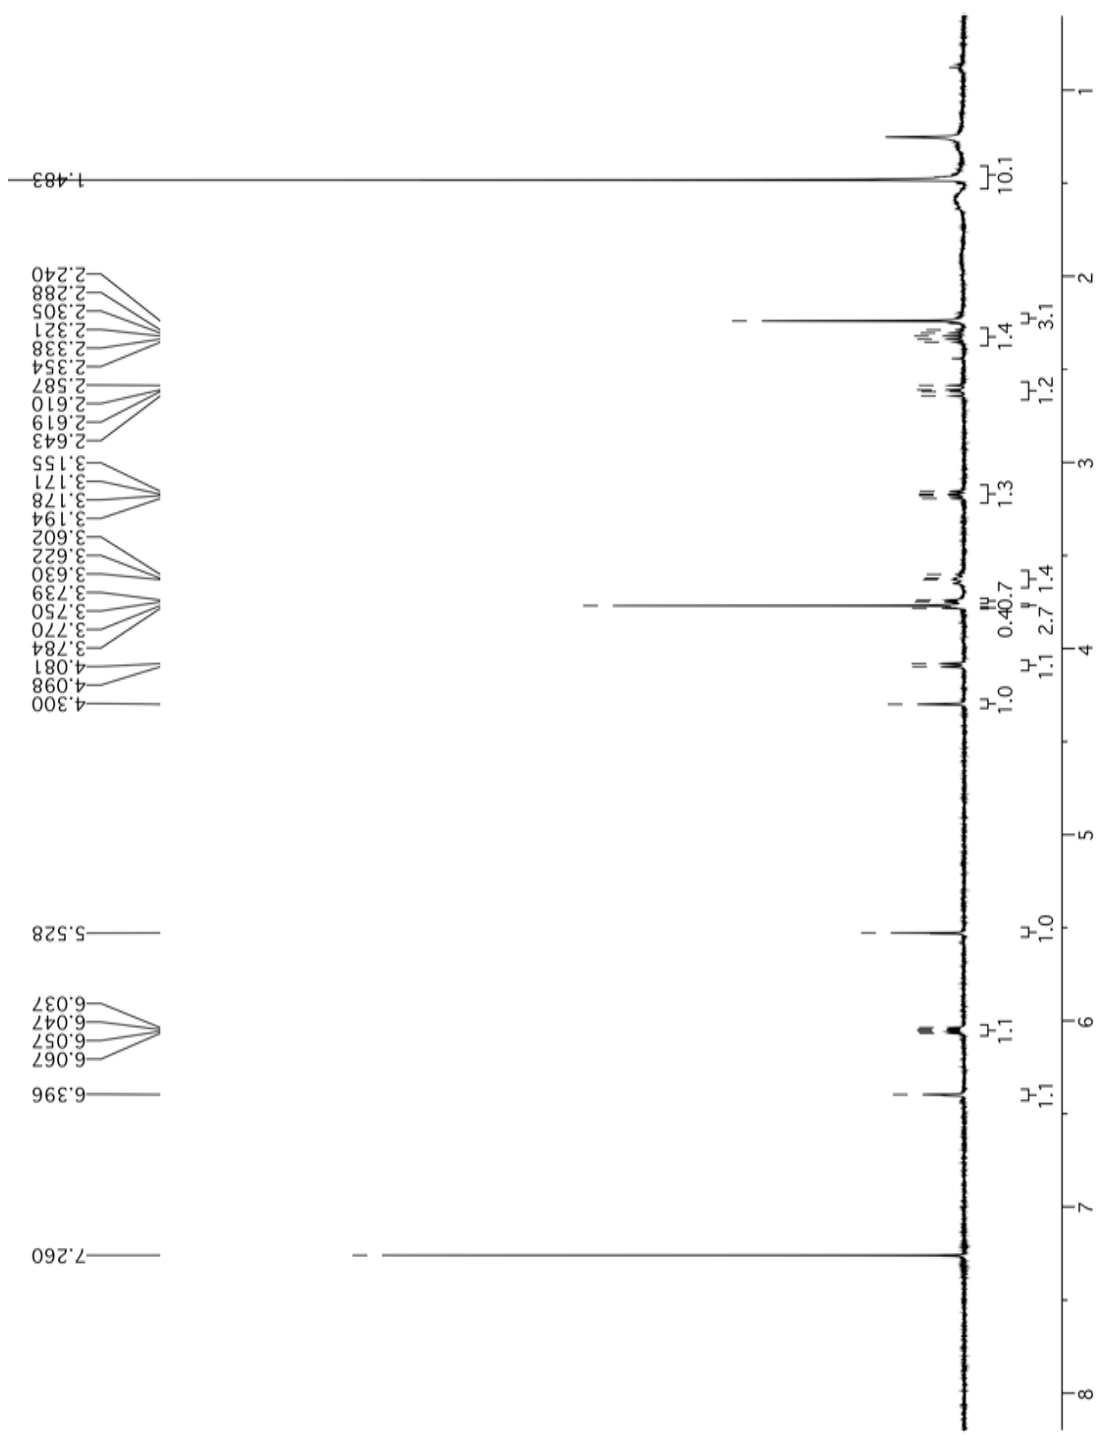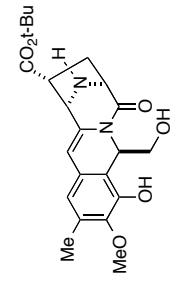

<sup>1</sup>H-NMR spectrum of compound 25 (400 MHz, CDCl<sub>3</sub>)



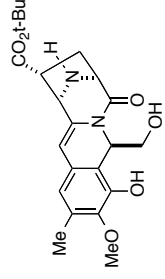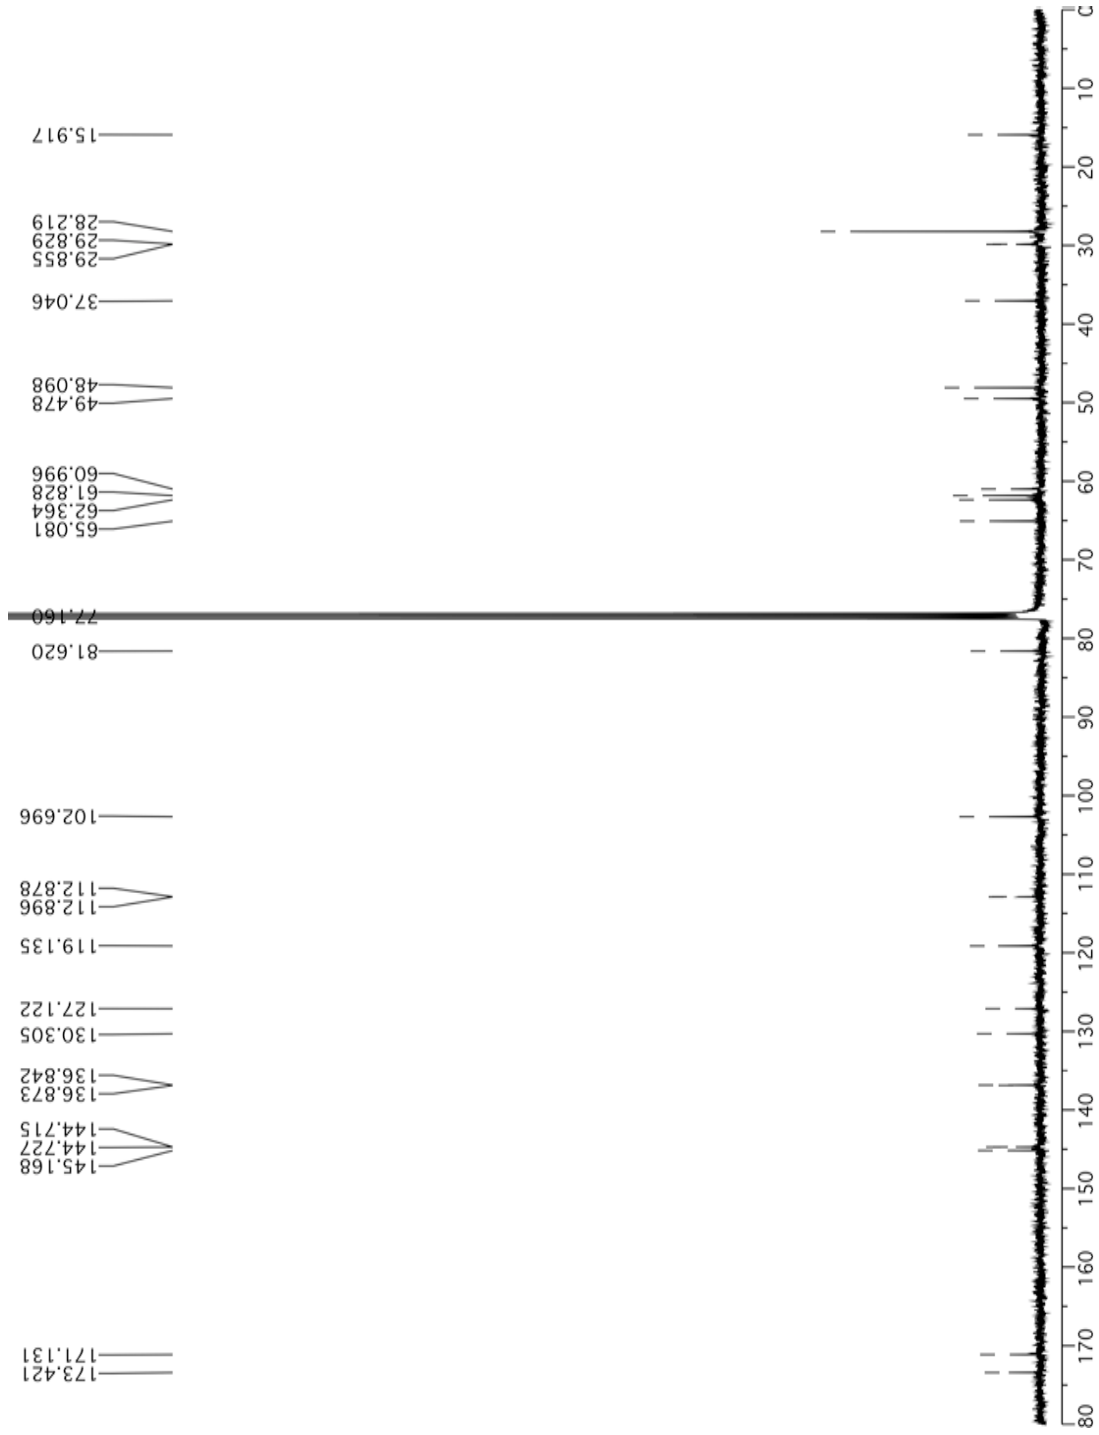

<sup>13</sup>C-NMR spectrum of compound 25 (101 MHz, CDCl<sub>3</sub>)

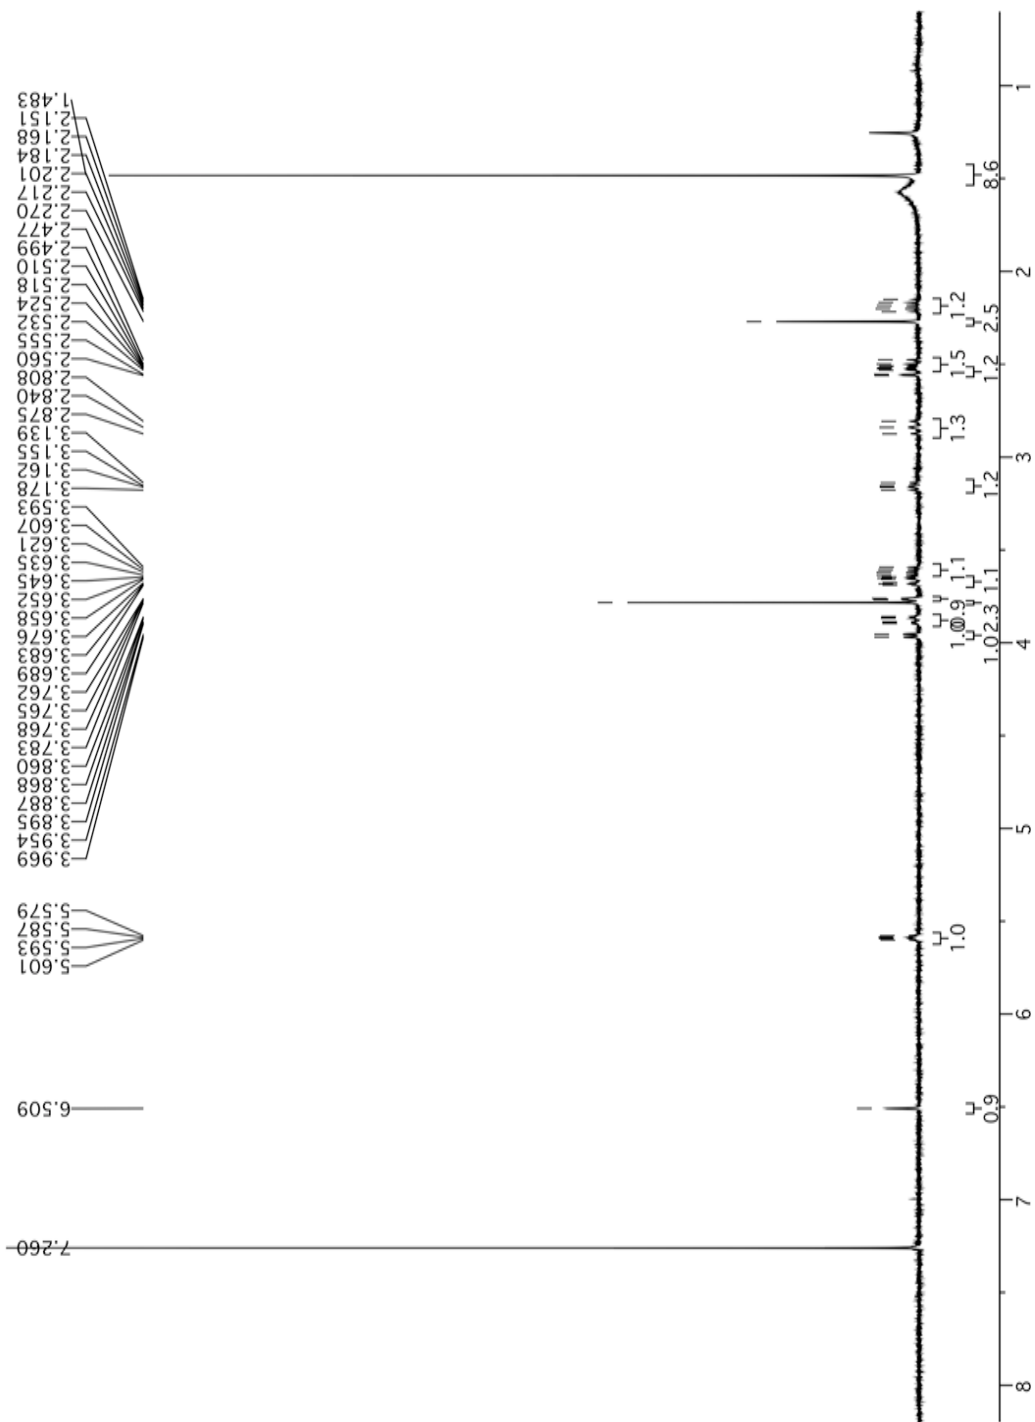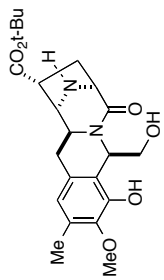

<sup>1</sup>H-NMR spectrum of compound 26 (400 MHz, CDCl<sub>3</sub>)

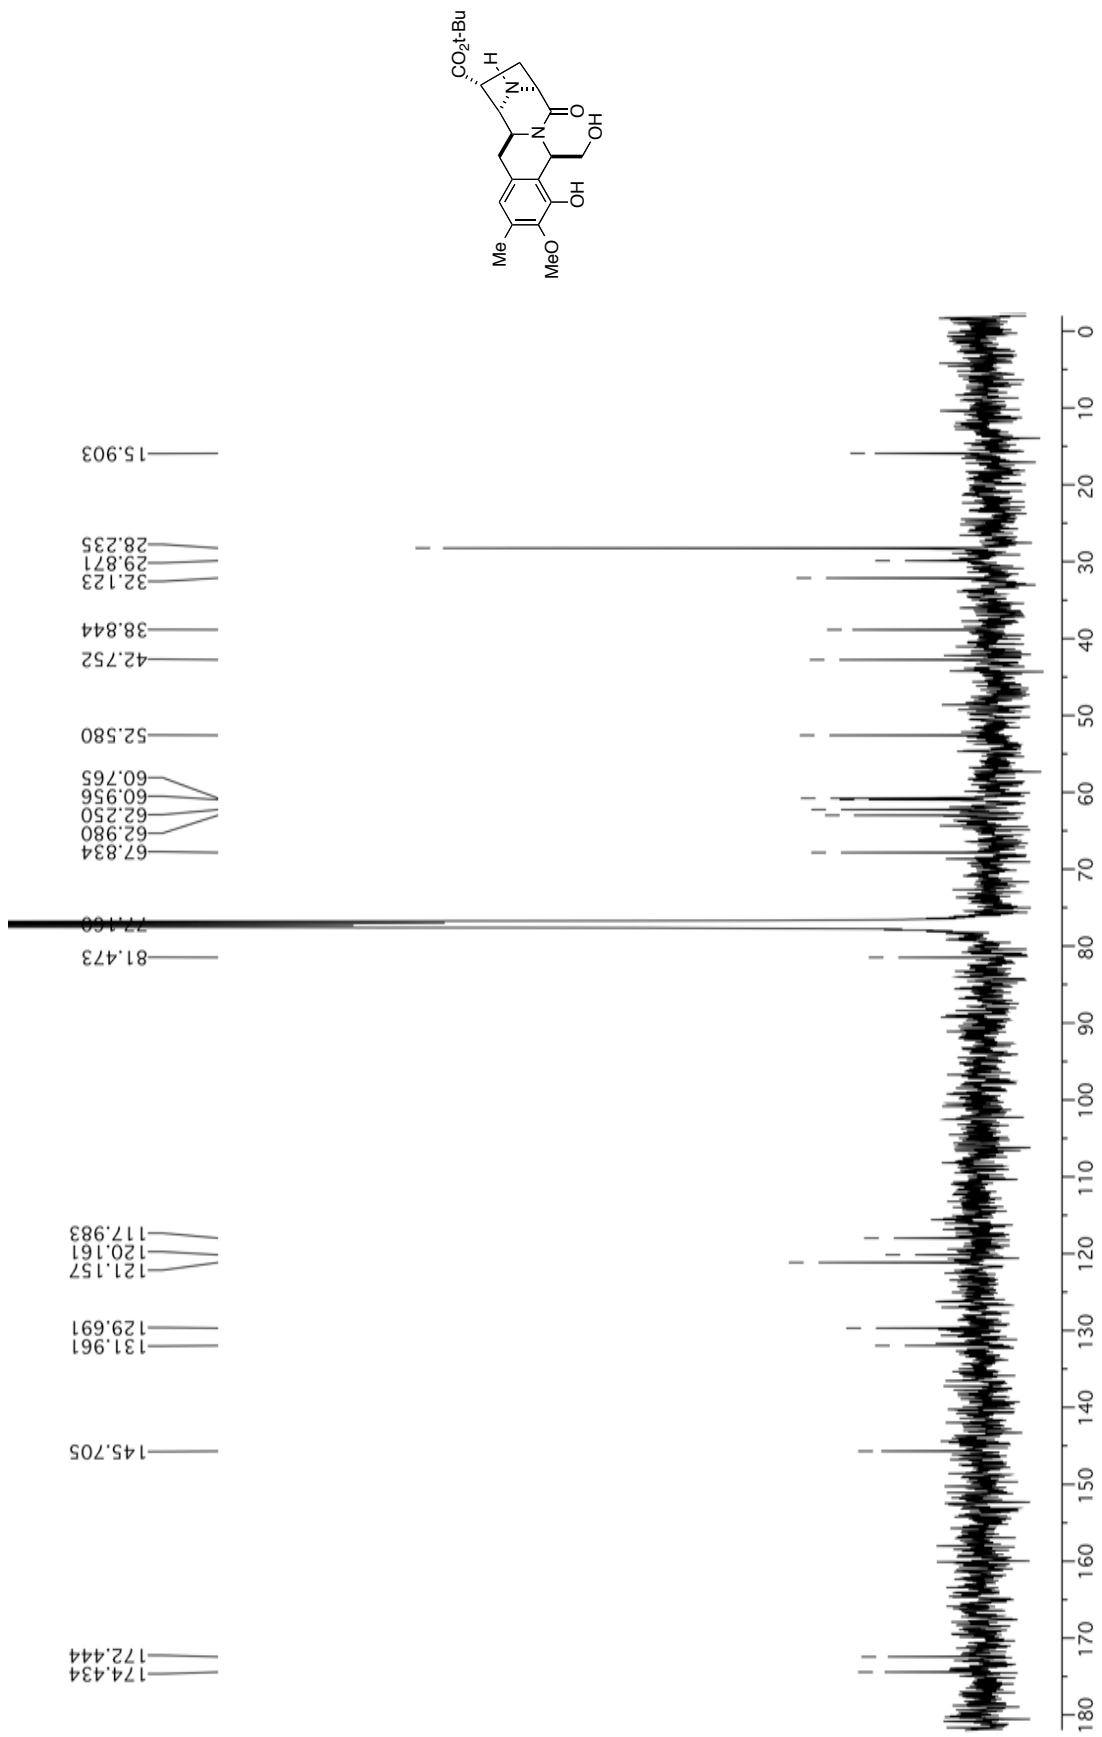

Supplement: NIHMS560612-supplement-supp_data.pdf [file NIHMS560612-supplement-supp_data.pdf]
